# Supplementary material for: Two distinct Sertoli cell states are regulated via germ cell crosstalk†
Source: Oxford University Press journal article supplement (doi:10.1093/biolre/ioab160), 2021-09-07
Supplement: supplementary_file_sertoli_6_21_ioab160.xlsx [file supplementary_file_sertoli_6_21_ioab160.xlsx]

## Sheet: Contents
Tab	Description
sc DEGs	List of DEGs from scRNA-seq of two main Sertoli cell clusters
sc DEGs Neg	List of DEGs from scRNA-seq of negatively selected Sertoli cells
A Max	List of DEGs that have maximum values in Group A RFPxAMH-Cre Sertoli cells
B Max	List of DEGs that have maximum values in Group B RFPxAMH-Cre Sertoli cells
C Max	List of DEGs that have maximum values in Group C RFPxAMH-Cre Sertoli cells
D Max	List of DEGs that have maximum values in Group D RFPxAMH-Cre Sertoli cells
E Max	List of DEGs that have maximum values in Group E RFPxAMH-Cre Sertoli cells
NANOS2 KO DEGs	List of DEGs seen across the length of one cycle of the seminiferous epithelium in NANOS2 KO mice
D>A	List of DEGs with higher expression in Group D tubules compared to Group A tubules from RFPxAMH-Cre Sertoli cells
A>D	List of DEGs with higher expression in Group A tubules compared to Group D tubules from RFPxAMH-Cre Sertoli cells

## Sheet: sc DEGs
gene	cluster	Fold Change	avgerage log(fold change)	pct.1	pct.2	p-value	p-value (adjusted
Dhcr24	1	0.259915	-1.3474	0.016	0.568	2.88571e-78	8.0794e-74
Serpina3a	1	0.110911	-2.19902	0.171	0.947	9.33101e-73	2.6125e-68
Gm14226	1	0.156717	-1.85331	0.119	0.842	1.31056e-70	3.66932e-66
Myl6b	1	0.154989	-1.8644	0.147	0.874	5.02516e-65	1.40694e-60
Aqp8	1	0.16823	-1.78243	0.188	0.895	3.40372e-56	9.52975e-52
Gm37350	1	0.119247	-2.12656	0.222	0.884	7.97213e-56	2.23204e-51
Prnp	1	0.194464	-1.63751	0.105	0.695	7.67882e-53	2.14991e-48
Gsta2	1	0.204381	-1.58777	0.086	0.674	1.36462e-52	3.82067e-48
Rhox5	1	0.232337	-1.45957	0.327	0.895	8.40577e-42	2.35345e-37
S100a1	1	0.152678	-1.87942	0.094	0.589	1.19565e-41	3.34758e-37
Defb36	1	3.11745	1.13701	0.984	0.884	7.09378e-36	1.98612e-31
1700031F05Rik	1	0.516961	-0.659787	0.008	0.263	8.25701e-35	2.3118e-30
Ndrg4	1	0.504581	-0.684027	0.014	0.295	1.73664e-34	4.86225e-30
Lgals1	1	15.1505	2.71803	0.797	0.158	2.33691e-33	6.54287e-29
Igfbp7	1	0.282192	-1.26517	0.443	0.926	1.01977e-32	2.85515e-28
Ttc9b	1	0.415055	-0.879343	0.01	0.253	3.96373e-32	1.10977e-27
Stmn1	1	0.34971	-1.05065	0.598	0.989	1.11815e-31	3.13059e-27
Ctsl	1	0.318118	-1.14533	0.951	0.989	6.08566e-31	1.70386e-26
Rhox8	1	0.401991	-0.911326	0.892	1	6.75398e-31	1.89098e-26
Slc26a10	1	0.493269	-0.7067	0.026	0.326	1.82041e-30	5.09679e-26
6030408B16Rik	1	0.375075	-0.98063	0.109	0.558	2.32597e-29	6.51226e-25
Olfml3	1	0.396309	-0.925561	0.085	0.505	4.57657e-29	1.28135e-24
Ly6c1	1	0.516975	-0.65976	0.008	0.221	4.24304e-28	1.18797e-23
Mfge8	1	0.270106	-1.30894	0.332	0.8	2.81074e-27	7.86951e-23
Serpina5	1	0.352376	-1.04306	0.469	0.905	3.00461e-26	8.41231e-22
Ndrg1	1	0.454356	-0.788874	0.064	0.421	3.4377e-26	9.62486e-22
Oat	1	0.375466	-0.979587	0.188	0.642	4.16132e-25	1.16509e-20
Drd4	1	0.331368	-1.10452	0.165	0.611	4.42173e-25	1.238e-20
Naglu	1	0.38438	-0.956123	0.105	0.495	1.16329e-24	3.25699e-20
Fkbp4	1	3.35872	1.21156	0.82	0.516	1.29182e-24	3.61684e-20
S100b	1	0.559802	-0.580172	0.004	0.168	7.18627e-24	2.01201e-19
Cdc42ep4	1	0.488431	-0.716557	0.04	0.326	7.58983e-24	2.125e-19
Corin	1	0.342539	-1.07137	0.131	0.526	7.87182e-24	2.20395e-19
Gng8	1	0.387616	-0.947741	0.019	0.242	2.06975e-23	5.79488e-19
Yipf1	1	0.421438	-0.864083	0.263	0.768	2.54313e-23	7.12025e-19
Cdo1	1	0.448971	-0.800797	0.074	0.411	2.73462e-23	7.65639e-19
Gpd1	1	0.445862	-0.807745	0.104	0.484	4.30386e-23	1.205e-18
Eppin	1	0.433808	-0.835154	0.615	0.968	7.34863e-23	2.05747e-18
U90926	1	0.516337	-0.660996	0.04	0.316	1.88566e-22	5.27947e-18
H2-K1	1	0.431984	-0.839368	0.326	0.789	2.75267e-22	7.70692e-18
Ivd	1	0.431313	-0.84092	0.079	0.411	2.86104e-22	8.01033e-18
Mif4gd	1	0.383906	-0.957356	0.19	0.621	2.89086e-22	8.09383e-18
Gstm6	1	0.430943	-0.841779	0.461	0.905	2.94907e-22	8.25681e-18
Elovl2	1	0.449059	-0.800601	0.195	0.653	9.19386e-22	2.5741e-17
Mapre2	1	0.630278	-0.461594	0.008	0.179	1.73485e-21	4.85724e-17
Id2	1	0.437503	-0.826671	0.108	0.474	2.48721e-21	6.9637e-17
Chchd10	1	2.02182	0.703999	0.967	0.937	3.13686e-21	8.78258e-17
Uchl1	1	5.19747	1.64817	0.644	0.158	7.62224e-21	2.13407e-16
Slc16a3	1	0.570997	-0.560371	0.011	0.189	7.95342e-21	2.2268e-16
Hmgn3	1	0.380507	-0.96625	0.224	0.632	9.83309e-21	2.75307e-16
Ms4a18	1	0.620143	-0.477806	0.001	0.126	3.57779e-20	1.00171e-15
Mt1	1	0.560314	-0.579257	0.963	1	3.72858e-20	1.04393e-15
Ano1	1	0.555313	-0.588223	0.027	0.253	4.55762e-20	1.27604e-15
Pbk	1	0.533086	-0.629073	0.078	0.4	6.68306e-20	1.87112e-15
Tpx2	1	0.414895	-0.87973	0.083	0.4	8.24292e-20	2.30785e-15
Fxyd6	1	3.74088	1.31932	0.67	0.179	9.57677e-20	2.6813e-15
Actn3	1	0.463933	-0.768016	0.065	0.358	1.05014e-19	2.94018e-15
Shf	1	0.575999	-0.55165	0.02	0.221	1.4471e-19	4.05159e-15
Hmgb3	1	0.471312	-0.752234	0.447	0.874	1.59809e-19	4.47433e-15
Ptgds	1	0.303203	-1.19335	0.656	0.874	1.96143e-19	5.49162e-15
Arhgap31	1	0.59164	-0.524857	0.011	0.179	2.43882e-19	6.82822e-15
Scara3	1	0.588269	-0.530571	0.02	0.221	3.51464e-19	9.84028e-15
Psap	1	0.430038	-0.843882	0.696	0.958	4.05127e-19	1.13427e-14
Chchd2	1	1.87653	0.629422	0.984	0.989	5.95016e-19	1.66593e-14
Tmem189	1	0.488361	-0.716701	0.041	0.284	6.79538e-19	1.90257e-14
Pros1	1	0.460463	-0.775523	0.164	0.558	7.53786e-19	2.11045e-14
Ndufv3	1	3.87132	1.3536	0.633	0.168	7.63522e-19	2.13771e-14
Galc	1	0.683139	-0.381057	0.014	0.189	8.73188e-19	2.44475e-14
Aspn	1	0.725721	-0.32059	0	0.105	1.03998e-18	2.91173e-14
Dpysl4	1	0.50173	-0.689693	0.06	0.337	1.17905e-18	3.30112e-14
8030411F24Rik	1	2.78933	1.0258	0.802	0.547	1.18737e-18	3.32441e-14
Nkpd1	1	0.608565	-0.496651	0.003	0.126	1.41456e-18	3.96048e-14
Fam110c	1	0.733901	-0.309381	0.001	0.116	1.88796e-18	5.28592e-14
Amy1	1	0.477507	-0.739177	0.042	0.284	2.26213e-18	6.33351e-14
Camk2n2	1	0.642625	-0.442193	0.012	0.179	2.86599e-18	8.0242e-14
Myh13	1	0.670046	-0.400409	0.008	0.158	3.0782e-18	8.61834e-14
Cd81	1	0.373847	-0.983909	0.559	0.895	3.67816e-18	1.02981e-13
Fuca1	1	0.435432	-0.831416	0.718	0.916	3.80941e-18	1.06656e-13
Tspan17	1	3.75998	1.32441	0.596	0.137	5.05454e-18	1.41517e-13
Art3	1	0.495416	-0.702358	0.117	0.463	6.68999e-18	1.87306e-13
Htatsf1	1	0.439424	-0.82229	0.254	0.663	7.4786e-18	2.09386e-13
Slc25a4	1	2.78339	1.02367	0.774	0.463	8.88026e-18	2.4863e-13
Spink8	1	0.561218	-0.577645	0.027	0.232	9.02122e-18	2.52576e-13
Tmed3	1	0.4954	-0.70239	0.613	0.916	9.81234e-18	2.74726e-13
Gpc4	1	0.419708	-0.868197	0.162	0.526	1.24842e-17	3.49532e-13
Sh2d4a	1	0.517876	-0.65802	0.06	0.326	1.6415e-17	4.59587e-13
Ptgr1	1	3.32567	1.20167	0.628	0.189	2.84108e-17	7.95445e-13
Adam8	1	0.593625	-0.521507	0.004	0.126	4.63542e-17	1.29783e-12
Slc7a4	1	0.444049	-0.811821	0.296	0.705	4.89368e-17	1.37013e-12
Amhr2	1	0.542112	-0.612282	0.903	1	5.19441e-17	1.45433e-12
Calr	1	0.466994	-0.761439	0.733	0.937	6.05549e-17	1.69541e-12
Gaa	1	0.469229	-0.756665	0.105	0.421	6.60383e-17	1.84894e-12
4930481A15Rik	1	0.671501	-0.39824	0.001	0.105	8.60782e-17	2.41002e-12
Ctsd	1	0.443613	-0.812802	0.296	0.684	9.9515e-17	2.78622e-12
Gm2a	1	2.24943	0.810678	0.937	0.853	1.43359e-16	4.01375e-12
Ttyh1	1	0.442514	-0.815282	0.33	0.716	1.61062e-16	4.50941e-12
Pex1	1	0.624555	-0.470716	0.011	0.158	2.01928e-16	5.65359e-12
Svs5	1	0.458225	-0.780396	0.116	0.432	2.07154e-16	5.7999e-12
Fndc5	1	0.510478	-0.672409	0.229	0.621	3.21626e-16	9.00489e-12
Cst9	1	0.674512	-0.393766	0.988	1	3.26179e-16	9.13236e-12
Tubgcp5	1	0.620863	-0.476645	0.022	0.2	5.05859e-16	1.4163e-11
Siva1	1	3.39303	1.22172	0.547	0.084	5.74015e-16	1.60713e-11
Tmprss6	1	0.737205	-0.304889	0.01	0.147	1.11221e-15	3.11395e-11
Sfxn3	1	0.572315	-0.558066	0.098	0.4	1.80203e-15	5.04532e-11
N4bp3	1	0.589572	-0.528359	0.023	0.2	1.88567e-15	5.2795e-11
Cldn11	1	0.550896	-0.59621	0.846	0.968	2.00284e-15	5.60755e-11
Rgs2	1	0.521261	-0.651504	0.115	0.421	2.19118e-15	6.13485e-11
Adgrl1	1	0.544833	-0.607275	0.102	0.4	2.69077e-15	7.53361e-11
Tmem52	1	0.463038	-0.769946	0.282	0.653	2.77525e-15	7.77014e-11
Maged1	1	0.509694	-0.673944	0.617	0.895	3.2739e-15	9.16625e-11
Galnt18	1	0.646336	-0.436436	0.018	0.179	3.31943e-15	9.29375e-11
Hsd17b1	1	0.692732	-0.367113	0.003	0.105	3.65385e-15	1.02301e-10
Prlr	1	0.754017	-0.282341	0.003	0.105	4.28004e-15	1.19833e-10
Clip3	1	0.752585	-0.284241	0.003	0.105	4.35582e-15	1.21954e-10
Acat1	1	0.519184	-0.655497	0.171	0.505	5.26075e-15	1.47291e-10
Atox1	1	2.16473	0.772295	0.857	0.695	6.03661e-15	1.69013e-10
Cmtm3	1	0.562812	-0.57481	0.086	0.368	6.30153e-15	1.7643e-10
Cadm1	1	0.485309	-0.72297	0.435	0.789	7.3116e-15	2.0471e-10
Chit1	1	0.621759	-0.475203	0.027	0.211	8.02008e-15	2.24546e-10
Serf1	1	2.11286	0.748041	0.858	0.653	9.73805e-15	2.72646e-10
Svs6	1	0.629933	-0.462141	0.014	0.158	1.01009e-14	2.82805e-10
Ctsa	1	0.556291	-0.586463	0.075	0.337	1.16508e-14	3.26198e-10
Tspan8	1	0.646915	-0.435541	0.007	0.126	1.16742e-14	3.26853e-10
Fuca2	1	0.425997	-0.853322	0.285	0.642	1.35258e-14	3.78696e-10
H2afx	1	0.53788	-0.62012	0.112	0.411	1.49674e-14	4.19057e-10
Qpct	1	0.536702	-0.622312	0.67	0.937	1.55284e-14	4.34764e-10
Clu	1	0.561252	-0.577585	0.947	1	1.70066e-14	4.7615e-10
Serpini1	1	0.496046	-0.701087	0.106	0.389	3.23284e-14	9.05132e-10
Kdsr	1	0.556358	-0.586343	0.098	0.379	4.91915e-14	1.37726e-09
Cldn23	1	0.638885	-0.448031	0.012	0.147	6.37114e-14	1.78379e-09
Defb45	1	0.49601	-0.70116	0.801	0.979	8.08077e-14	2.26245e-09
Cmtm6	1	0.509691	-0.673951	0.198	0.526	9.67959e-14	2.71009e-09
Adgrg1	1	0.456498	-0.784171	0.136	0.432	1.06578e-13	2.98398e-09
Dbi	1	2.03352	0.70977	0.85	0.663	1.22822e-13	3.43877e-09
Bbx	1	0.45271	-0.792503	0.31	0.653	1.68362e-13	4.71381e-09
Itm2b	1	0.612084	-0.490886	0.849	1	2.28668e-13	6.40223e-09
Ppm1m	1	3.12603	1.13976	0.441	0.053	2.55336e-13	7.14891e-09
Ftl1	1	0.50096	-0.691229	0.801	0.958	3.22445e-13	9.02781e-09
Sec62	1	0.487575	-0.718311	0.453	0.779	3.92042e-13	1.09764e-08
Hspa5	1	0.493619	-0.705992	0.583	0.842	4.34924e-13	1.2177e-08
Dnajc9	1	0.556042	-0.586911	0.1	0.368	4.59295e-13	1.28593e-08
Cyth2	1	0.496785	-0.699597	0.464	0.779	5.20728e-13	1.45793e-08
Cyb5a	1	2.45721	0.899027	0.662	0.305	6.04585e-13	1.69272e-08
Gnai2	1	0.547276	-0.602801	0.518	0.863	7.46339e-13	2.0896e-08
Erp29	1	0.533239	-0.628785	0.719	0.926	7.75896e-13	2.17235e-08
Sema3c	1	0.494452	-0.704304	0.083	0.326	7.89764e-13	2.21118e-08
Dixdc1	1	0.653755	-0.425022	0.027	0.189	8.39904e-13	2.35156e-08
Maged2	1	0.552045	-0.594125	0.4	0.758	9.18e-13	2.57022e-08
Hmbs	1	0.536918	-0.621909	0.173	0.484	1.10819e-12	3.10271e-08
Asah1	1	0.51725	-0.659228	0.203	0.526	1.12805e-12	3.15832e-08
Zfyve27	1	0.589712	-0.528121	0.042	0.232	1.1801e-12	3.30404e-08
Lamp1	1	0.533958	-0.627439	0.484	0.8	2.14852e-12	6.01543e-08
Calr4	1	0.54281	-0.610995	0.143	0.432	2.40098e-12	6.72225e-08
Atp6ap2	1	0.524564	-0.645188	0.191	0.516	3.13059e-12	8.76501e-08
Creg1	1	0.553461	-0.591564	0.595	0.842	3.16742e-12	8.86813e-08
Mgarp	1	2.63402	0.96851	0.509	0.116	3.62915e-12	1.01609e-07
Alcam	1	0.761029	-0.273084	0.008	0.116	4.53025e-12	1.26838e-07
Dct	1	0.718849	-0.330104	0.011	0.126	4.85415e-12	1.35907e-07
Sdhb	1	0.542163	-0.612188	0.329	0.705	4.94529e-12	1.38458e-07
Pfdn1	1	2.37312	0.864205	0.638	0.347	5.31091e-12	1.48695e-07
Sil1	1	0.565968	-0.569218	0.187	0.505	5.32935e-12	1.49211e-07
Clic1	1	2.03569	0.710835	0.782	0.516	6.05996e-12	1.69667e-07
Ank	1	0.555072	-0.588657	0.05	0.242	6.13298e-12	1.71711e-07
4930502E18Rik	1	0.556048	-0.586901	0.1	0.347	6.37179e-12	1.78397e-07
Aldh1a7	1	0.728864	-0.316268	0.016	0.147	7.51009e-12	2.10267e-07
Aldh1a1	1	0.531187	-0.632642	0.453	0.768	7.8081e-12	2.18611e-07
1700019B21Rik	1	2.08641	0.735443	0.831	0.505	9.68333e-12	2.71114e-07
1700024P16Rik	1	0.604751	-0.502938	0.056	0.253	1.03717e-11	2.90386e-07
Bik	1	2.93531	1.07681	0.427	0.063	1.08006e-11	3.02396e-07
Pomp	1	2.35648	0.857168	0.678	0.442	1.53988e-11	4.31135e-07
Hmgn5	1	0.473257	-0.748117	0.326	0.632	1.70087e-11	4.7621e-07
Bscl2	1	0.547034	-0.603244	0.256	0.579	1.97191e-11	5.52096e-07
Rhbdf2	1	0.686223	-0.376552	0.018	0.147	2.2263e-11	6.23321e-07
Sf3b2	1	0.545679	-0.605725	0.206	0.516	2.51311e-11	7.0362e-07
Entpd1	1	0.742796	-0.297334	0.01	0.116	2.63713e-11	7.38344e-07
Arxes2	1	0.537983	-0.619929	0.286	0.6	2.88895e-11	8.08849e-07
Tst	1	2.11481	0.748963	0.694	0.347	3.13535e-11	8.77837e-07
Smco4	1	0.649596	-0.431404	0.087	0.326	3.49956e-11	9.79806e-07
Cox5a	1	1.79088	0.582709	0.864	0.737	3.523e-11	9.8637e-07
Akr1b3	1	0.619207	-0.479316	0.843	0.958	3.6328e-11	1.01711e-06
Fgfrl1	1	0.66391	-0.409608	0.022	0.158	3.84776e-11	1.0773e-06
Gatm	1	0.675735	-0.391954	0.906	0.989	4.1431e-11	1.15999e-06
Cpe	1	0.58265	-0.540169	0.467	0.832	4.20805e-11	1.17817e-06
Sh3gl3	1	2.70105	0.993641	0.359	0.021	4.21142e-11	1.17911e-06
Rpl11	1	1.66989	0.512757	0.928	0.8	4.27399e-11	1.19663e-06
Myo10	1	0.566971	-0.567447	0.156	0.442	4.51183e-11	1.26322e-06
Ero1l	1	0.613686	-0.488273	0.041	0.211	5.12975e-11	1.43623e-06
Hist3h2a	1	0.58946	-0.528549	0.074	0.284	5.79749e-11	1.62318e-06
Gm9112	1	1.7069	0.534676	0.944	0.874	6.56593e-11	1.83833e-06
Wipf3	1	0.548882	-0.599872	0.172	0.453	7.4137e-11	2.07569e-06
Fndc3b	1	0.643573	-0.44072	0.067	0.274	7.50276e-11	2.10062e-06
Rgma	1	0.585769	-0.534829	0.034	0.189	7.70621e-11	2.15758e-06
Rcn1	1	0.592741	-0.522998	0.055	0.242	8.21282e-11	2.29943e-06
Cited1	1	0.648819	-0.432602	0.823	0.968	8.27846e-11	2.3178e-06
Tmem255a	1	2.72544	1.00263	0.374	0.032	8.52556e-11	2.38699e-06
Atp1a1	1	0.612988	-0.48941	0.412	0.8	1.05515e-10	2.95421e-06
Slc29a1	1	0.581738	-0.541735	0.191	0.484	1.55636e-10	4.35749e-06
Gstm1	1	0.685412	-0.377735	0.884	0.968	1.56433e-10	4.37982e-06
Cdkn2b	1	0.601126	-0.50895	0.071	0.274	1.59288e-10	4.45976e-06
Fam181b	1	0.617113	-0.482703	0.09	0.316	1.6455e-10	4.60708e-06
Tom1l1	1	0.623907	-0.471754	0.056	0.242	1.82546e-10	5.11091e-06
Wfdc9	1	0.579371	-0.545812	0.086	0.305	2.51599e-10	7.04426e-06
Qsox1	1	0.531416	-0.63221	0.337	0.663	2.84488e-10	7.9651e-06
Sod3	1	2.89299	1.06229	0.432	0.116	3.74375e-10	1.04818e-05
Pycard	1	0.663549	-0.410153	0.035	0.189	3.86721e-10	1.08274e-05
Acsbg1	1	0.55021	-0.597455	0.398	0.695	3.9596e-10	1.10861e-05
Myzap	1	0.642316	-0.442675	0.059	0.242	4.66508e-10	1.30613e-05
D730048I06Rik	1	0.701782	-0.354132	0.018	0.137	4.67582e-10	1.30914e-05
Atpif1	1	1.63132	0.489387	0.913	0.832	4.81146e-10	1.34711e-05
Mid1ip1	1	0.558831	-0.581908	0.183	0.453	5.06492e-10	1.41808e-05
Tmem206	1	0.554344	-0.589969	0.164	0.432	5.84884e-10	1.63756e-05
Pttg1ip	1	0.581534	-0.542086	0.389	0.695	8.48827e-10	2.37655e-05
Ajuba	1	0.632729	-0.457713	0.07	0.263	1.12992e-09	3.16355e-05
Lrpap1	1	0.548081	-0.601331	0.427	0.716	1.14154e-09	3.1961e-05
Wfdc1	1	2.62629	0.965571	0.432	0.105	1.60421e-09	4.49148e-05
Cdk20	1	0.732028	-0.311936	0.019	0.137	1.70641e-09	4.77761e-05
Arf5	1	1.83141	0.605083	0.789	0.674	1.76249e-09	4.93462e-05
Rgcc	1	0.581293	-0.5425	0.207	0.484	1.91974e-09	5.3749e-05
Rnd2	1	2.4992	0.91597	0.308	0.011	1.96555e-09	5.50313e-05
BC022687	1	0.577444	-0.549144	0.179	0.442	2.03297e-09	5.6919e-05
Cidea	1	2.57763	0.94687	0.469	0.147	2.13048e-09	5.96492e-05
Tgfbr3l	1	0.761464	-0.272512	0.014	0.116	2.45041e-09	6.86064e-05
Pigs	1	0.625103	-0.46984	0.123	0.358	2.61765e-09	7.32889e-05
Arnt2	1	0.701585	-0.354413	0.011	0.105	2.65391e-09	7.43042e-05
Ebp	1	0.603446	-0.505099	0.392	0.705	3.09064e-09	8.65317e-05
Jam2	1	0.57451	-0.554239	0.08	0.274	3.13071e-09	8.76536e-05
C1qtnf6	1	0.737506	-0.304482	0.011	0.105	3.27081e-09	9.15762e-05
1810037I17Rik	1	1.93576	0.660502	0.73	0.6	3.35957e-09	9.40612e-05
Tmem59	1	0.582889	-0.539759	0.54	0.821	3.37384e-09	9.44609e-05
Hspb1	1	0.591416	-0.525235	0.789	0.947	4.21835e-09	0.000118105
Drap1	1	0.564843	-0.571207	0.237	0.505	4.36098e-09	0.000122099
Slc41a3	1	0.572469	-0.557797	0.131	0.358	4.44776e-09	0.000124528
Slc22a17	1	0.581704	-0.541794	0.091	0.295	4.75424e-09	0.000133109
Pld3	1	0.539085	-0.617882	0.336	0.611	4.94286e-09	0.00013839
Spint2	1	1.78277	0.578168	0.795	0.632	5.29689e-09	0.000148302
Epn1	1	0.597667	-0.514721	0.209	0.474	5.51819e-09	0.000154498
Pja1	1	0.613288	-0.48892	0.255	0.558	6.20283e-09	0.000173667
Dhrs7	1	2.21426	0.794919	0.407	0.095	6.55491e-09	0.000183524
Dip2b	1	0.652421	-0.427065	0.065	0.242	6.84131e-09	0.000191543
Gnptg	1	0.679333	-0.386644	0.078	0.274	7.1347e-09	0.000199757
Slc13a2	1	0.718122	-0.331115	0.025	0.147	7.47193e-09	0.000209199
1810058I24Rik	1	1.7325	0.549568	0.831	0.716	7.96972e-09	0.000223136
1500009L16Rik	1	2.16137	0.770743	0.577	0.316	9.31083e-09	0.000260685
Zfp385a	1	0.60808	-0.497449	0.089	0.284	9.50343e-09	0.000266077
Neu1	1	0.631319	-0.459944	0.104	0.316	1.01664e-08	0.00028464
Fkbp9	1	0.571845	-0.558887	0.091	0.284	1.17507e-08	0.000328996
Gnai1	1	0.629978	-0.46207	0.063	0.232	1.27783e-08	0.000357767
Uxs1	1	0.564708	-0.571446	0.405	0.653	1.40284e-08	0.000392766
Mgst1	1	2.01527	0.700752	0.596	0.326	1.42428e-08	0.000398771
Rab3b	1	0.616902	-0.483045	0.095	0.295	1.42775e-08	0.000399741
Amigo2	1	0.658029	-0.418507	0.023	0.137	1.55027e-08	0.000434044
Ndufa6	1	1.81668	0.59701	0.76	0.663	1.62649e-08	0.000455384
Noa1	1	0.714138	-0.336679	0.052	0.211	1.7555e-08	0.000491505
Sptbn1	1	0.632688	-0.457778	0.072	0.253	1.75985e-08	0.000492722
Ar	1	0.758032	-0.277029	0.019	0.126	1.83663e-08	0.00051422
Sbk1	1	0.646496	-0.436188	0.079	0.263	1.95149e-08	0.000546378
Ap2m1	1	0.563096	-0.574305	0.411	0.684	1.97579e-08	0.000553181
Pla2g7	1	2.66425	0.979923	0.348	0.074	1.99048e-08	0.000557295
Plin2	1	0.66169	-0.412959	0.044	0.189	2.01465e-08	0.000564063
Wnt6	1	0.575064	-0.553274	0.15	0.379	2.03878e-08	0.000570819
Mylk	1	0.574608	-0.554068	0.246	0.505	2.0893e-08	0.000584961
Pde4b	1	0.670536	-0.399677	0.053	0.211	2.40805e-08	0.000674206
Aard	1	0.760048	-0.274374	0.967	1	2.57149e-08	0.000719965
Hmg20b	1	2.07486	0.729893	0.569	0.337	2.96419e-08	0.000829915
Dip2a	1	0.767685	-0.264376	0.016	0.116	2.99924e-08	0.000839726
Tgoln1	1	0.566993	-0.567408	0.195	0.432	3.01705e-08	0.000844715
Zfp280b	1	0.749139	-0.288831	0.016	0.116	3.13951e-08	0.000878999
Kdelr2	1	2.42312	0.885055	0.475	0.2	3.15975e-08	0.000884666
Fabp5	1	0.663064	-0.410883	0.296	0.611	3.24739e-08	0.000909203
Slc7a6	1	0.65763	-0.419114	0.07	0.242	3.26922e-08	0.000915316
Tspan4	1	0.68684	-0.375654	0.02	0.126	3.78792e-08	0.00106054
Rpl13	1	1.4697	0.385059	0.969	0.958	3.95319e-08	0.00110681
Tceal3	1	0.690443	-0.370422	0.014	0.105	4.01304e-08	0.00112357
Slc39a7	1	0.670317	-0.400005	0.154	0.4	4.11975e-08	0.00115345
Abracl	1	0.620883	-0.476613	0.28	0.537	4.24109e-08	0.00118742
H2afj	1	0.562031	-0.576198	0.357	0.611	4.70628e-08	0.00131766
Hn1	1	1.66291	0.50857	0.783	0.632	4.90138e-08	0.00137229
Ddah2	1	2.24531	0.808846	0.372	0.105	5.04417e-08	0.00141227
Hexa	1	0.595281	-0.518721	0.491	0.789	5.34519e-08	0.00149655
C1qbp	1	0.647824	-0.434136	0.317	0.621	5.52941e-08	0.00154812
Ncapd2	1	0.688964	-0.372566	0.05	0.2	5.71122e-08	0.00159903
Fam53a	1	0.616409	-0.483845	0.16	0.389	5.75441e-08	0.00161112
Mkl2	1	0.737599	-0.304355	0.037	0.168	5.95735e-08	0.00166794
Alad	1	0.603302	-0.505337	0.54	0.8	6.03245e-08	0.00168897
Akt2	1	0.634312	-0.455215	0.13	0.347	6.08454e-08	0.00170355
Fut8	1	0.705452	-0.348916	0.07	0.242	6.30888e-08	0.00176636
Atp5h	1	1.61846	0.481477	0.861	0.842	6.35195e-08	0.00177842
Mfsd7c	1	0.668963	-0.402027	0.098	0.295	6.52451e-08	0.00182673
Mxra7	1	2.1226	0.752644	0.28	0.021	6.54149e-08	0.00183149
Akap12	1	0.594148	-0.520626	0.492	0.747	6.84228e-08	0.0019157
Nenf	1	0.667479	-0.404247	0.741	0.926	7.79394e-08	0.00218215
Rpl38	1	1.48059	0.392438	0.926	0.863	7.82333e-08	0.00219038
2700060E02Rik	1	1.96147	0.673695	0.543	0.274	9.75417e-08	0.00273097
Rpl6	1	1.68691	0.522896	0.772	0.621	1.00956e-07	0.00282656
Scand1	1	1.8665	0.624065	0.647	0.432	1.08659e-07	0.00304224
Slc30a5	1	0.700533	-0.355914	0.038	0.168	1.10801e-07	0.00310219
Rpl14	1	1.54862	0.437362	0.896	0.832	1.1597e-07	0.00324693
Wbp2	1	0.618087	-0.481126	0.209	0.453	1.21359e-07	0.00339781
Efhd1	1	1.9669	0.67646	0.484	0.2	1.2596e-07	0.00352663
Zwint	1	0.618816	-0.479947	0.308	0.589	1.3166e-07	0.00368623
Arl6ip1	1	0.615523	-0.485284	0.604	0.821	1.32589e-07	0.00371222
Fam213a	1	2.09115	0.737716	0.508	0.263	1.32875e-07	0.00372024
Tsx	1	0.695374	-0.363306	0.88	0.937	1.38403e-07	0.003875
Marcks	1	0.571021	-0.560329	0.318	0.568	1.38714e-07	0.00388371
Tnik	1	0.729342	-0.315613	0.087	0.274	1.46641e-07	0.00410566
Atp1b3	1	0.681961	-0.382783	0.217	0.474	1.67572e-07	0.00469167
Nhp2	1	0.605388	-0.501885	0.517	0.726	1.68644e-07	0.00472169
Apoa2	1	0.508298	-0.676687	0.291	0.526	1.6928e-07	0.00473951
Adora1	1	0.655364	-0.422564	0.18	0.421	1.70156e-07	0.00476402
Isoc2b	1	2.36343	0.860113	0.25	0.011	1.76562e-07	0.00494338
Cotl1	1	2.04696	0.716357	0.311	0.053	1.77921e-07	0.00498143
Ndufc1	1	1.82994	0.604285	0.724	0.589	1.80965e-07	0.00506665
Fam134b	1	0.670791	-0.399298	0.08	0.253	1.83267e-07	0.00513111
Eef1d	1	0.636933	-0.451091	0.514	0.758	2.06376e-07	0.0057781
Prdx5	1	1.86376	0.622595	0.488	0.232	2.10249e-07	0.00588654
Tiam1	1	0.647422	-0.434757	0.106	0.295	2.11263e-07	0.00591495
Vsig10	1	0.677607	-0.389187	0.075	0.242	2.23678e-07	0.00626252
Mfsd10	1	0.691506	-0.368884	0.059	0.211	2.2718e-07	0.00636057
Med10	1	1.54134	0.432651	0.858	0.789	2.40976e-07	0.00674685
Dll3	1	0.640375	-0.445701	0.055	0.2	2.46102e-07	0.00689036
Stard5	1	0.740437	-0.300514	0.023	0.126	2.51714e-07	0.00704749
Tubb3	1	2.11258	0.747909	0.598	0.4	2.56862e-07	0.00719163
Cln5	1	0.733423	-0.310032	0.035	0.158	2.73836e-07	0.00766687
Polr1d	1	1.74773	0.558319	0.69	0.526	2.83699e-07	0.00794301
Myo5b	1	0.730705	-0.313746	0.035	0.158	2.87409e-07	0.00804688
Kctd12	1	0.669286	-0.401543	0.089	0.263	2.98065e-07	0.00834524
Hspd1	1	0.603043	-0.505767	0.266	0.526	3.0297e-07	0.00848254
Rpl17	1	1.5885	0.462793	0.812	0.789	3.03081e-07	0.00848567
1700011M02Rik	1	1.42024	0.350826	0.955	0.968	3.15131e-07	0.00882302
Tyro3	1	0.591713	-0.524733	0.168	0.389	3.36193e-07	0.00941272
Ccdc28b	1	2.16614	0.772947	0.386	0.137	3.50136e-07	0.00980311
Gab1	1	0.749844	-0.28789	0.031	0.147	3.57067e-07	0.00999716
Atp6v0b	1	0.598041	-0.514097	0.525	0.747	3.67414e-07	0.0102868
Dusp15	1	0.634543	-0.45485	0.131	0.326	3.94356e-07	0.0110412
Lamp2	1	0.668009	-0.403454	0.147	0.358	4.38868e-07	0.0122874
Pcsk1n	1	1.7737	0.573066	0.753	0.6	4.44776e-07	0.0124528
Galnt1	1	0.635819	-0.452842	0.165	0.379	4.60163e-07	0.0128836
Slc26a7	1	0.671991	-0.39751	0.098	0.284	4.89636e-07	0.0137088
Tcn2	1	0.764879	-0.268038	0.055	0.2	5.15139e-07	0.0144229
Gabarapl1	1	0.715904	-0.334209	0.431	0.758	5.34636e-07	0.0149687
Pdia3	1	0.648471	-0.433138	0.58	0.8	5.51931e-07	0.015453
Rpn2	1	0.66001	-0.4155	0.446	0.726	5.63147e-07	0.015767
Sphk2	1	0.66104	-0.413941	0.147	0.358	5.75662e-07	0.0161174
Dhx32	1	0.681405	-0.383598	0.177	0.411	5.84447e-07	0.0163633
Mmp14	1	0.649801	-0.43109	0.113	0.305	5.9934e-07	0.0167803
Gba	1	0.604793	-0.50287	0.119	0.305	6.09955e-07	0.0170775
Minos1	1	1.60454	0.472836	0.824	0.811	6.38236e-07	0.0178693
Slc9a3r1	1	2.11308	0.748149	0.296	0.063	6.43959e-07	0.0180296
Tns3	1	0.720183	-0.32825	0.038	0.158	6.79549e-07	0.019026
Cmc2	1	0.62244	-0.474108	0.278	0.537	6.8753e-07	0.0192495
Cdc73	1	0.660838	-0.414247	0.098	0.274	7.04548e-07	0.0197259
Zfp410	1	0.737755	-0.304144	0.052	0.189	7.50159e-07	0.0210029
Psmd2	1	0.704567	-0.350172	0.411	0.705	7.64131e-07	0.0213941
Higd1a	1	1.89321	0.638274	0.585	0.4	7.76991e-07	0.0217542
Bcr	1	0.757395	-0.27787	0.025	0.126	7.99302e-07	0.0223788
Os9	1	0.607709	-0.498058	0.222	0.463	8.77351e-07	0.0245641
Neo1	1	0.703109	-0.352243	0.106	0.295	8.8056e-07	0.0246539
Baz1a	1	0.594153	-0.520618	0.145	0.347	9.91402e-07	0.0277573
Cdc42	1	1.70584	0.534059	0.644	0.453	1.00738e-06	0.0282048
Islr2	1	0.690015	-0.371042	0.044	0.168	1.03027e-06	0.0288454
Sowahd	1	1.94102	0.663216	0.224	0.011	1.05167e-06	0.0294446
Gpr108	1	0.714267	-0.336499	0.09	0.263	1.0652e-06	0.0298235
Etl4	1	0.688951	-0.372585	0.055	0.189	1.08485e-06	0.0303736
Ndufs5	1	1.64625	0.498501	0.711	0.579	1.12857e-06	0.0315978
Tpm1	1	0.747763	-0.290669	0.053	0.189	1.25943e-06	0.0352615
Ppt1	1	0.64944	-0.431645	0.804	0.884	1.28133e-06	0.0358746
Tsc22d1	1	0.664446	-0.408802	0.587	0.8	1.2945e-06	0.0362434
Med4	1	0.658781	-0.417363	0.191	0.411	1.32813e-06	0.0371851
Rnaset2a	1	1.93493	0.660073	0.357	0.116	1.36167e-06	0.0381241
Man1a2	1	0.650921	-0.429366	0.097	0.263	1.41305e-06	0.0395625
Pgrmc1	1	0.634248	-0.455316	0.636	0.811	1.42047e-06	0.0397702
Aldh1a2	1	0.685664	-0.377368	0.035	0.147	1.48305e-06	0.0415225
Slc52a2	1	0.632903	-0.457439	0.078	0.232	1.48396e-06	0.041548
Psmb5	1	1.7113	0.537256	0.638	0.484	1.50618e-06	0.04217
Bax	1	0.65375	-0.425031	0.199	0.421	1.54182e-06	0.043168
Uckl1os	1	0.767423	-0.264717	0.022	0.116	1.62574e-06	0.0455174
Rnpep	1	0.747269	-0.29133	0.07	0.221	1.63273e-06	0.0457132
Sel1l	1	0.718027	-0.331248	0.06	0.2	1.7325e-06	0.0485064
Bag2	1	0.620293	-0.477564	0.203	0.411	1.75213e-06	0.0490562
Pigt	1	0.679683	-0.386128	0.364	0.611	1.78876e-06	0.0500816
Tox	1	0.738915	-0.302572	0.045	0.168	1.84163e-06	0.0515621
Aldh1b1	1	2.02635	0.706235	0.256	0.042	1.84717e-06	0.051717
Chpf	1	0.687697	-0.374407	0.326	0.579	1.86214e-06	0.0521362
Hsp90b1	1	0.678075	-0.388497	0.667	0.842	1.99523e-06	0.0558626
Emc3	1	0.736097	-0.306393	0.154	0.368	2.00262e-06	0.0560695
Trim26	1	0.668889	-0.402137	0.109	0.284	2.03419e-06	0.0569533
Hmgcs2	1	0.634507	-0.454907	0.112	0.284	2.09173e-06	0.0585642
Abat	1	0.734139	-0.309057	0.13	0.326	2.24977e-06	0.062989
Rpl39	1	1.65214	0.502074	0.782	0.663	2.25021e-06	0.0630015
Prkcsh	1	0.648836	-0.432575	0.297	0.547	2.25214e-06	0.0630554
Fez2	1	1.9412	0.663305	0.282	0.063	2.25371e-06	0.0630995
Xkr8	1	0.7041	-0.350834	0.052	0.179	2.34316e-06	0.0656038
Smarca2	1	0.620514	-0.477208	0.173	0.379	2.40388e-06	0.067304
B3gnt8	1	0.752026	-0.284985	0.05	0.179	2.66888e-06	0.0747233
Tmx2	1	0.664284	-0.409046	0.312	0.547	2.76791e-06	0.077496
Rps6	1	1.53904	0.431158	0.757	0.695	2.83799e-06	0.0794581
Cox7c	1	1.45223	0.373098	0.869	0.8	3.03913e-06	0.0850896
Oaz1	1	1.51247	0.413745	0.85	0.832	3.04366e-06	0.0852163
Dnajb9	1	0.660598	-0.41461	0.19	0.4	3.09041e-06	0.0865252
Tnpo3	1	0.704593	-0.350135	0.064	0.2	3.15119e-06	0.088227
Tex30	1	0.633617	-0.45631	0.348	0.589	3.47538e-06	0.0973038
Cmbl	1	1.89774	0.640666	0.206	0.011	3.48255e-06	0.0975044
Npr1	1	0.614263	-0.487332	0.171	0.368	3.49848e-06	0.0979506
Wbp1l	1	0.715169	-0.335237	0.085	0.242	3.5053e-06	0.0981414
Bod1l	1	0.652244	-0.427336	0.154	0.347	3.51644e-06	0.0984532
Tnp2	1	1.63531	0.491833	0.956	1	3.63851e-06	0.101871
Taf4b	1	0.746743	-0.292035	0.033	0.137	3.68829e-06	0.103265
Pfkfb4	1	0.737779	-0.304111	0.025	0.116	3.76615e-06	0.105445
Tmx4	1	0.654067	-0.424545	0.12	0.295	3.78709e-06	0.106031
Ncoa2	1	0.678762	-0.387485	0.214	0.432	4.01767e-06	0.112487
H2-DMa	1	1.90103	0.642395	0.24	0.032	4.08078e-06	0.114254
St8sia2	1	0.670317	-0.400005	0.124	0.305	4.26048e-06	0.119285
Rpl26	1	1.50849	0.41111	0.836	0.8	4.57995e-06	0.128229
Usp7	1	0.703844	-0.351198	0.075	0.221	4.72782e-06	0.13237
Atp5j	1	1.51538	0.415665	0.731	0.568	4.93339e-06	0.138125
Slc39a6	1	0.612705	-0.489872	0.186	0.389	5.52381e-06	0.154656
Alg1	1	0.738705	-0.302856	0.075	0.221	5.56225e-06	0.155732
Pdia6	1	0.665808	-0.406754	0.43	0.684	5.73974e-06	0.160701
Rab13	1	2.07645	0.73066	0.321	0.105	5.8144e-06	0.162792
Rabac1	1	1.52802	0.423972	0.778	0.684	5.87393e-06	0.164458
Prm1	1	1.55385	0.440737	1	1	5.93927e-06	0.166288
Anapc5	1	0.656986	-0.420092	0.377	0.621	5.94878e-06	0.166554
Fkbp5	1	0.722889	-0.3245	0.06	0.189	6.37498e-06	0.178487
Akr1c13	1	1.95731	0.671569	0.211	0.021	6.80811e-06	0.190614
Ucp2	1	1.73579	0.551464	0.501	0.295	6.81004e-06	0.190667
Atp2b4	1	0.711255	-0.340724	0.083	0.232	6.89684e-06	0.193098
Ccdc28a	1	0.72125	-0.326769	0.147	0.337	6.94948e-06	0.194572
Cd59a	1	1.86261	0.621979	0.345	0.116	7.14893e-06	0.200156
Tmed9	1	0.649256	-0.431928	0.423	0.621	7.4915e-06	0.209747
Mpzl1	1	0.63775	-0.44981	0.338	0.568	7.5646e-06	0.211794
Rpl23	1	1.38336	0.324516	0.944	0.916	7.84013e-06	0.219508
2410002F23Rik	1	0.615674	-0.485037	0.262	0.474	8.45002e-06	0.236584
Helz	1	0.69792	-0.359651	0.198	0.411	8.56603e-06	0.239832
Rbbp7	1	0.609639	-0.494889	0.336	0.558	8.67536e-06	0.242893
Tapbp	1	0.632143	-0.458639	0.454	0.716	8.91199e-06	0.249518
Ccdc107	1	1.98606	0.686155	0.304	0.095	9.00648e-06	0.252164
Dnajb11	1	0.714818	-0.335727	0.246	0.474	9.01408e-06	0.252376
Bop1	1	0.680418	-0.385048	0.123	0.295	9.01443e-06	0.252386
Sema6c	1	0.635888	-0.452732	0.233	0.442	9.0989e-06	0.254751
Wfdc6a	1	0.644014	-0.440035	0.412	0.632	9.6873e-06	0.271225
Stt3a	1	0.748057	-0.290277	0.154	0.358	9.87518e-06	0.276485
Rhob	1	0.699559	-0.357305	0.175	0.379	1.02166e-05	0.286045
Lmo2	1	0.737695	-0.304225	0.071	0.211	1.02751e-05	0.287683
Nsmce4a	1	1.90572	0.644858	0.308	0.095	1.14127e-05	0.319534
Sfxn1	1	1.88494	0.633896	0.235	0.042	1.18593e-05	0.332038
Myo7a	1	0.707601	-0.345875	0.16	0.347	1.23889e-05	0.346864
Slc27a3	1	0.744494	-0.295051	0.149	0.337	1.24631e-05	0.348942
Wnk3	1	0.710532	-0.341742	0.131	0.305	1.26163e-05	0.353232
Cgrrf1	1	0.706738	-0.347096	0.091	0.242	1.26269e-05	0.353529
Pspc1	1	0.673946	-0.394605	0.094	0.242	1.26334e-05	0.35371
Ssbp4	1	0.680303	-0.385217	0.149	0.326	1.27938e-05	0.358201
Retsat	1	0.721634	-0.326237	0.083	0.232	1.31411e-05	0.367924
Hk2	1	0.677265	-0.389693	0.177	0.368	1.31538e-05	0.36828
Capn10	1	0.713647	-0.337367	0.116	0.284	1.35511e-05	0.379404
Plp1	1	1.80603	0.59113	0.27	0.063	1.35666e-05	0.379838
Glmp	1	0.65157	-0.428371	0.194	0.389	1.50699e-05	0.421928
Pdzd11	1	0.678351	-0.38809	0.246	0.463	1.53738e-05	0.430437
Olfml2b	1	0.629825	-0.462313	0.089	0.232	1.54121e-05	0.431509
Ccdc25	1	0.679412	-0.386528	0.255	0.463	1.58603e-05	0.444057
Gnl3	1	0.689783	-0.371378	0.082	0.221	1.58609e-05	0.444074
Gatsl3	1	1.76401	0.567591	0.205	0.021	1.62114e-05	0.453886
Akr1a1	1	0.707519	-0.345991	0.58	0.789	1.69859e-05	0.47557
Sec61a1	1	0.707636	-0.345826	0.146	0.326	1.71651e-05	0.480587
Nt5c	1	1.79114	0.582855	0.508	0.347	1.81094e-05	0.507028
Rpl27	1	1.55912	0.444125	0.729	0.611	1.83079e-05	0.512585
Znfx1	1	0.728115	-0.317296	0.068	0.2	1.8336e-05	0.513372
Mum1l1	1	0.6615	-0.413245	0.3	0.516	1.83771e-05	0.514523
3110043O21Rik	1	0.740814	-0.300006	0.027	0.116	1.87336e-05	0.524504
Dnm3	1	0.774534	-0.255493	0.074	0.211	1.95399e-05	0.547077
Scara5	1	0.732795	-0.310889	0.138	0.316	2.04549e-05	0.572695
Mrpl3	1	0.724294	-0.322557	0.198	0.4	2.08376e-05	0.583411
Laptm4a	1	0.69997	-0.356718	0.615	0.842	2.10207e-05	0.588539
Ube2s	1	1.51567	0.415861	0.714	0.6	2.19348e-05	0.61413
Ranbp1	1	0.661376	-0.413432	0.468	0.684	2.27482e-05	0.636903
Rap1a	1	1.76518	0.568253	0.401	0.189	2.27698e-05	0.637508
Scrib	1	0.740508	-0.300418	0.112	0.274	2.34108e-05	0.655455
Echs1	1	1.69562	0.528046	0.501	0.295	2.35858e-05	0.660355
Zdhhc6	1	0.754998	-0.28104	0.064	0.189	2.36622e-05	0.662496
Gm5900	1	0.763249	-0.27017	0.087	0.232	2.38097e-05	0.666624
Hebp1	1	1.74625	0.557469	0.21	0.032	2.41116e-05	0.675076
Actg1	1	0.754053	-0.282293	0.91	1	2.44516e-05	0.684596
Clic6	1	0.761442	-0.272542	0.042	0.147	2.48452e-05	0.695615
Rpl37	1	1.43296	0.359745	0.859	0.747	2.57271e-05	0.720309
Igsf8	1	0.65351	-0.425398	0.415	0.621	2.64777e-05	0.741322
Laptm4b	1	0.768834	-0.26288	0.709	0.905	2.70853e-05	0.758334
Dstn	1	1.57451	0.453941	0.647	0.474	2.7127e-05	0.759502
Bex4	1	1.47578	0.389189	0.836	0.853	2.72555e-05	0.763099
Clcn5	1	0.701797	-0.354111	0.044	0.147	2.74157e-05	0.767584
Tpi1	1	1.76875	0.570271	0.471	0.295	2.81381e-05	0.787811
Rpl34	1	1.44819	0.370312	0.791	0.716	2.87035e-05	0.80364
Lasp1	1	1.73165	0.549078	0.25	0.063	2.9826e-05	0.835068
Mgst3	1	0.599658	-0.511396	0.303	0.495	2.98376e-05	0.835394
Inpp5b	1	0.660687	-0.414475	0.121	0.274	2.9848e-05	0.835684
Cpped1	1	0.733797	-0.309522	0.06	0.179	3.00471e-05	0.841259
Gja1	1	0.698397	-0.358968	0.314	0.537	3.01565e-05	0.844322
Rps13	1	1.47902	0.391382	0.795	0.684	3.10789e-05	0.870146
Thra	1	0.757846	-0.277275	0.029	0.116	3.23946e-05	0.906984
Pex11a	1	0.724006	-0.322956	0.108	0.263	3.31821e-05	0.929033
Abcc1	1	0.726297	-0.319797	0.104	0.253	3.43288e-05	0.961137
Ssr1	1	0.729835	-0.314937	0.31	0.537	3.51481e-05	0.984076
Hsd17b10	1	1.79407	0.584488	0.282	0.095	3.61234e-05	1
Pfkl	1	1.87586	0.629069	0.285	0.095	3.6693e-05	1
Acbd5	1	0.662673	-0.411474	0.143	0.305	3.77035e-05	1
1600012H06Rik	1	0.755602	-0.28024	0.102	0.253	3.77439e-05	1
Prdx4	1	0.719347	-0.329411	0.445	0.695	3.79885e-05	1
Porcn	1	0.763379	-0.270001	0.078	0.211	3.81622e-05	1
Ckap2l	1	0.772789	-0.257749	0.044	0.147	3.89644e-05	1
Rps11	1	1.38872	0.328382	0.895	0.916	3.99297e-05	1
Rilpl2	1	1.79168	0.583153	0.31	0.116	4.00064e-05	1
Mtap7d3	1	1.81336	0.59518	0.172	0.011	4.11445e-05	1
Lamtor3	1	0.754205	-0.282091	0.095	0.242	4.27125e-05	1
Vdac1	1	1.72259	0.543827	0.499	0.316	4.38519e-05	1
Gnb2	1	1.5533	0.44038	0.659	0.579	4.49336e-05	1
Cox6c	1	1.39565	0.333361	0.909	0.863	4.50071e-05	1
Taldo1	1	1.74266	0.555415	0.457	0.284	4.61171e-05	1
Lrrc8c	1	0.741443	-0.299158	0.056	0.168	4.67919e-05	1
Slc25a14	1	0.704331	-0.350507	0.127	0.284	4.71886e-05	1
Ndufa10	1	0.651597	-0.42833	0.389	0.621	4.77592e-05	1
Dolk	1	0.758932	-0.275843	0.061	0.179	5.04662e-05	1
Nt5c3b	1	1.7596	0.565089	0.469	0.295	5.05301e-05	1
BC003965	1	0.659931	-0.41562	0.16	0.326	5.21865e-05	1
Ctnnal1	1	0.723077	-0.32424	0.127	0.284	5.40281e-05	1
Cdc5l	1	0.722197	-0.325457	0.132	0.295	5.4163e-05	1
Slc38a10	1	0.712029	-0.339637	0.08	0.211	5.46702e-05	1
Klhl23	1	0.680316	-0.385197	0.278	0.474	5.56888e-05	1
Nfkbia	1	0.657332	-0.419567	0.355	0.558	5.76131e-05	1
Cdh2	1	0.71826	-0.330923	0.157	0.337	5.79962e-05	1
Pfn1	1	1.47605	0.389368	0.707	0.568	5.93922e-05	1
Rnf115	1	0.721852	-0.325935	0.093	0.232	6.01919e-05	1
Tmem51	1	1.72983	0.548023	0.207	0.042	6.06658e-05	1
Cisd1	1	1.87009	0.625987	0.366	0.189	6.11287e-05	1
Slc30a2	1	0.708531	-0.344562	0.274	0.474	6.28179e-05	1
Bcl7c	1	0.664999	-0.40797	0.109	0.253	6.40923e-05	1
Fbxl6	1	0.744609	-0.294896	0.101	0.242	6.4348e-05	1
Sf3a3	1	0.751936	-0.285105	0.105	0.253	6.44311e-05	1
Kansl3	1	0.635224	-0.453777	0.229	0.4	6.61179e-05	1
Pum3	1	0.757525	-0.277699	0.068	0.189	6.87201e-05	1
Scarb1	1	1.79623	0.585691	0.381	0.189	6.90308e-05	1
Morf4l2	1	0.709237	-0.343566	0.432	0.653	6.91594e-05	1
Ggh	1	0.684318	-0.379333	0.139	0.295	6.98363e-05	1
Aldh2	1	0.730608	-0.313878	0.6	0.842	7.25677e-05	1
Hpse	1	1.68686	0.522868	0.162	0.011	7.34354e-05	1
Tmpo	1	0.775187	-0.254651	0.093	0.232	7.37171e-05	1
Atp5j2	1	1.52228	0.420211	0.696	0.589	7.44167e-05	1
Cdk5	1	1.63827	0.493638	0.536	0.379	7.64291e-05	1
Rbbp4	1	0.691998	-0.368173	0.401	0.611	7.68021e-05	1
Kcnk13	1	0.775766	-0.253905	0.041	0.137	8.05934e-05	1
Cd151	1	0.744982	-0.294395	0.479	0.705	8.24924e-05	1
Rab4a	1	1.7663	0.568889	0.306	0.126	8.34702e-05	1
Commd8	1	0.71627	-0.333698	0.106	0.253	8.50475e-05	1
Erf	1	0.768069	-0.263876	0.046	0.147	8.63474e-05	1
Psmb7	1	1.52463	0.421749	0.63	0.484	8.6576e-05	1
Hacd3	1	0.687844	-0.374193	0.132	0.284	8.7401e-05	1
Phf8	1	0.776607	-0.252821	0.07	0.189	8.78772e-05	1
Tox2	1	1.63754	0.493194	0.162	0.011	9.09731e-05	1
Ndufa3	1	1.42716	0.355684	0.757	0.653	9.2665e-05	1
Casp6	1	1.77561	0.574147	0.27	0.095	9.54647e-05	1
Tmem147	1	1.68482	0.521661	0.544	0.358	9.63351e-05	1
Gclm	1	0.764672	-0.268309	0.076	0.2	0.000103613	1
Aifm1	1	0.722201	-0.325452	0.071	0.189	0.000104222	1
Serpinb6a	1	0.660703	-0.414451	0.306	0.495	0.000106351	1
Cmas	1	1.61418	0.47883	0.533	0.368	0.000108439	1
Rmnd5b	1	0.712777	-0.338587	0.206	0.389	0.000109001	1
Ubl3	1	0.66519	-0.407682	0.239	0.421	0.00011033	1
H13	1	0.710262	-0.342121	0.207	0.389	0.000110393	1
Eif4g1	1	0.712804	-0.338549	0.186	0.358	0.000112737	1
Tmem123	1	0.757825	-0.277303	0.078	0.2	0.000117413	1
Slc25a5	1	0.732151	-0.311769	0.718	0.884	0.000119309	1
Sod2	1	1.72057	0.542654	0.435	0.274	0.00012233	1
Prss35	1	0.77367	-0.256609	0.027	0.105	0.000123819	1
Emb	1	1.9681	0.677068	0.362	0.189	0.000126011	1
Hspa8	1	0.762816	-0.270738	0.715	0.926	0.000133763	1
Rplp1	1	1.28873	0.253654	0.967	0.968	0.000138806	1
App	1	0.650619	-0.429831	0.303	0.474	0.000139054	1
Itm2c	1	0.742539	-0.29768	0.662	0.832	0.000139221	1
Gm10605	1	0.751957	-0.285077	0.091	0.221	0.000139298	1
Zfp148	1	0.681329	-0.38371	0.075	0.189	0.000140892	1
Tspan5	1	0.654676	-0.423614	0.214	0.389	0.000142601	1
Spock2	1	0.666129	-0.406272	0.237	0.421	0.000146965	1
Rnf34	1	0.66942	-0.401343	0.276	0.453	0.000147311	1
Rpl36al	1	1.48551	0.395757	0.726	0.653	0.000148924	1
Agpat4	1	0.737524	-0.304456	0.424	0.653	0.000157197	1
Gna12	1	1.54079	0.432298	0.153	0.011	0.000159901	1
Surf2	1	0.771874	-0.258934	0.072	0.189	0.000161062	1
Rbp1	1	1.85854	0.619789	0.166	0.021	0.000162046	1
Tfe3	1	0.697069	-0.360872	0.082	0.2	0.000164467	1
Mkrn1	1	1.4468	0.369354	0.603	0.474	0.000170111	1
Rnaset2b	1	1.64793	0.499517	0.198	0.042	0.000170908	1
Mafb	1	0.762728	-0.270854	0.098	0.232	0.0001767	1
Alas2	1	1.76348	0.567287	0.33	0.147	0.000180195	1
Rpl37a	1	1.35803	0.306034	0.906	0.821	0.000184652	1
Rap2b	1	0.751267	-0.285994	0.087	0.211	0.000186197	1
Rps27l	1	1.47026	0.385436	0.69	0.568	0.000187692	1
Cd302	1	1.58665	0.461624	0.574	0.453	0.000189969	1
Gm15543	1	1.7257	0.545632	0.371	0.189	0.000195252	1
Hist1h2bc	1	0.704505	-0.350259	0.398	0.6	0.000196183	1
Clstn1	1	0.689965	-0.371114	0.176	0.337	0.000197483	1
Rps27a	1	1.33418	0.288315	0.918	0.863	0.000209096	1
Mier3	1	0.710589	-0.341661	0.117	0.253	0.000209417	1
Mcee	1	0.633974	-0.455748	0.222	0.379	0.000212073	1
Sdf4	1	0.770522	-0.260687	0.538	0.737	0.000214336	1
Pisd	1	0.772773	-0.25777	0.08	0.2	0.000217996	1
Smarca4	1	0.697101	-0.360824	0.121	0.263	0.000220126	1
Ppt2	1	0.731985	-0.311995	0.196	0.368	0.000222843	1
Med16	1	0.778703	-0.250125	0.05	0.147	0.000231548	1
Zeb2	1	0.747978	-0.290381	0.057	0.158	0.000231825	1
Klc2	1	0.73905	-0.30239	0.236	0.432	0.000231864	1
Wfdc6b	1	0.776718	-0.252678	0.126	0.274	0.000234146	1
Cks2	1	1.67545	0.516079	0.498	0.358	0.000253125	1
Sf3b1	1	0.76336	-0.270026	0.165	0.326	0.000255015	1
Agpat5	1	1.77206	0.572143	0.255	0.095	0.000257706	1
Cd99l2	1	0.767496	-0.264622	0.087	0.211	0.000258247	1
Txndc5	1	1.64168	0.495721	0.379	0.211	0.000258276	1
Ptpn1	1	0.724203	-0.322684	0.146	0.295	0.000258468	1
Gas2l1	1	0.732369	-0.311471	0.447	0.653	0.000262677	1
Canx	1	0.729851	-0.314915	0.28	0.463	0.000264388	1
Cyb5r1	1	0.721315	-0.326679	0.364	0.547	0.000268062	1
Enpp5	1	0.697666	-0.360015	0.203	0.368	0.000272909	1
Polr2e	1	0.755917	-0.279823	0.27	0.474	0.000276787	1
Btf3	1	1.39097	0.330002	0.804	0.779	0.000283501	1
RP23-198F11.3	1	1.5946	0.46662	0.142	0.011	0.000294789	1
Mrps17	1	1.65334	0.502796	0.536	0.4	0.000300119	1
Rap1b	1	1.68236	0.520199	0.449	0.305	0.000311755	1
Nudt9	1	0.65837	-0.417989	0.292	0.453	0.00031479	1
Rpl32	1	1.31634	0.274852	0.877	0.874	0.000316846	1
Ivns1abp	1	0.738786	-0.302747	0.177	0.337	0.000319199	1
Tmem50a	1	0.734502	-0.308563	0.382	0.568	0.000330717	1
Mro	1	1.67508	0.515858	0.443	0.316	0.000342568	1
Zc3h7b	1	0.702771	-0.352725	0.19	0.347	0.000345462	1
Usp9x	1	0.678021	-0.388576	0.173	0.337	0.000346785	1
Ngfrap1	1	0.749078	-0.288913	0.314	0.516	0.000349199	1
Nf2	1	0.716062	-0.333988	0.113	0.242	0.000356393	1
Cct3	1	0.70251	-0.353096	0.353	0.547	0.00035713	1
Vdac2	1	1.42296	0.352743	0.64	0.516	0.000359796	1
Ninj1	1	0.756681	-0.278814	0.359	0.558	0.000368983	1
Anp32b	1	0.765787	-0.266852	0.195	0.368	0.000370013	1
Lgmn	1	2.01005	0.698162	0.551	0.442	0.000374545	1
Pgp	1	1.35072	0.300638	0.794	0.674	0.000375163	1
Psmb6	1	1.48651	0.396432	0.653	0.526	0.000376256	1
Fstl3	1	1.49048	0.399099	0.218	0.063	0.000377585	1
Tepp	1	1.53883	0.431025	0.138	0.011	0.00040077	1
Galk2	1	0.756006	-0.279706	0.048	0.137	0.000404522	1
Pigk	1	0.711295	-0.340668	0.192	0.358	0.000411969	1
Slc3a2	1	0.739164	-0.302236	0.492	0.705	0.000413963	1
Ttyh2	1	1.63335	0.490631	0.216	0.063	0.000420168	1
Phax	1	0.718249	-0.33094	0.179	0.337	0.000425424	1
Comt	1	1.5956	0.467247	0.241	0.084	0.000432041	1
Rad21	1	0.777606	-0.251535	0.187	0.358	0.000444824	1
S100a13	1	0.722563	-0.324951	0.055	0.147	0.000454143	1
Hist1h1c	1	0.773491	-0.256841	0.091	0.211	0.000455821	1
Fbln1	1	1.70328	0.532553	0.18	0.042	0.000456989	1
Tbrg1	1	1.52409	0.421398	0.423	0.242	0.000457052	1
Ncstn	1	0.721066	-0.327025	0.169	0.326	0.000462471	1
Birc5	1	0.77655	-0.252894	0.048	0.137	0.000467287	1
Nampt	1	0.743039	-0.297007	0.134	0.274	0.000477422	1
2010107G23Rik	1	1.57825	0.456317	0.211	0.063	0.000483787	1
Fbxo34	1	0.737281	-0.304786	0.138	0.274	0.000496005	1
Slc2a3	1	0.75679	-0.27867	0.187	0.347	0.000498497	1
Cryz	1	1.59189	0.46492	0.195	0.053	0.00050774	1
Haus7	1	1.56933	0.450651	0.393	0.221	0.000509888	1
Rassf2	1	0.761982	-0.271833	0.108	0.232	0.00051697	1
Tex264	1	0.755065	-0.280951	0.142	0.284	0.000523287	1
Fam60a	1	1.53797	0.430461	0.15	0.021	0.000524646	1
Chpt1	1	1.57375	0.453463	0.179	0.042	0.000525032	1
Psmg3	1	0.710674	-0.341541	0.126	0.253	0.000531959	1
Rdx	1	0.679567	-0.386299	0.306	0.474	0.000537133	1
Slc35f2	1	1.59747	0.468422	0.131	0.011	0.000540382	1
Manf	1	1.31833	0.276365	0.903	0.874	0.000541583	1
Il10rb	1	0.659479	-0.416305	0.15	0.284	0.000542976	1
Mlec	1	0.764647	-0.268341	0.274	0.463	0.000546105	1
Rps24	1	1.31707	0.275411	0.855	0.768	0.000548322	1
Ganab	1	0.688954	-0.372581	0.082	0.189	0.000549921	1
Ppp1ca	1	1.60205	0.471287	0.479	0.379	0.000557414	1
Sncb	1	1.44569	0.368584	0.113	0	0.000563189	1
Cpq	1	0.765379	-0.267384	0.209	0.379	0.000569568	1
Rora	1	1.46851	0.38425	0.149	0.021	0.000591624	1
Tbcb	1	0.759413	-0.27521	0.574	0.737	0.000620096	1
Exosc5	1	0.764343	-0.268739	0.596	0.821	0.00062214	1
Helt	1	1.50533	0.409009	0.13	0.011	0.000624506	1
Ddx3x	1	0.763281	-0.27013	0.153	0.295	0.000629744	1
Scd2	1	0.742013	-0.298389	0.397	0.6	0.000665195	1
Dact2	1	1.46717	0.383333	0.111	0	0.000667266	1
Srp54b	1	0.747381	-0.29118	0.265	0.442	0.00067199	1
Calm3	1	0.730326	-0.314264	0.578	0.726	0.000674547	1
Gca	1	1.60536	0.473347	0.241	0.095	0.000688956	1
Tulp2	1	1.64035	0.494908	0.314	0.158	0.000699408	1
Serf2	1	1.32532	0.281652	0.894	0.884	0.000699752	1
Rps6ka3	1	0.774702	-0.255277	0.033	0.105	0.000711799	1
Slc47a2	1	0.724721	-0.321968	0.252	0.421	0.000715477	1
Nfx1	1	0.681077	-0.38408	0.117	0.242	0.000746164	1
Nacc2	1	1.46732	0.383434	0.145	0.021	0.000756246	1
Gsta3	1	1.53379	0.427741	0.164	0.032	0.000759221	1
Fam210b	1	0.753393	-0.283168	0.157	0.295	0.000761556	1
Gnas	1	1.40832	0.3424	0.749	0.737	0.000769152	1
Appl2	1	0.685279	-0.377929	0.21	0.347	0.00078838	1
Tuba4a	1	0.755789	-0.279993	0.05	0.137	0.000796629	1
Atp6ap1	1	0.769864	-0.261542	0.158	0.305	0.000803732	1
Eef2	1	0.774719	-0.255255	0.692	0.842	0.00080871	1
Anxa2	1	0.709995	-0.342497	0.521	0.705	0.000831356	1
Kitl	1	0.77863	-0.250219	0.087	0.2	0.000850265	1
Tmem115	1	0.730461	-0.31408	0.106	0.221	0.000852341	1
Cnpy3	1	0.755001	-0.281036	0.154	0.295	0.000863599	1
Rpl3	1	1.3742	0.317871	0.756	0.695	0.000866465	1
Rab31	1	0.718031	-0.331243	0.237	0.389	0.000866837	1
Tmem180	1	1.61112	0.476931	0.261	0.116	0.000892928	1
Uqcr11	1	1.37206	0.31631	0.794	0.758	0.000903769	1
Plk2	1	1.46159	0.379527	0.105	0	0.000935206	1
Atp5g1	1	1.34393	0.295596	0.791	0.737	0.000959589	1
Snf8	1	1.55224	0.4397	0.469	0.337	0.000962733	1
Pdia4	1	0.764973	-0.267915	0.281	0.453	0.00101436	1
Ldha	1	1.58666	0.461633	0.458	0.326	0.00102228	1
Acaa2	1	1.5681	0.449867	0.288	0.137	0.0010299	1
Gfm1	1	0.770574	-0.260619	0.045	0.126	0.00103082	1
Dnajc7	1	1.52797	0.42394	0.4	0.242	0.00103676	1
H2-D1	1	0.738026	-0.303776	0.256	0.421	0.00103977	1
E330017L17Rik	1	1.41781	0.349112	0.124	0.011	0.00105358	1
Glo1	1	0.732236	-0.311652	0.383	0.537	0.00106708	1
Twf2	1	1.57312	0.45306	0.273	0.126	0.00107156	1
Parp1	1	0.714683	-0.335916	0.207	0.358	0.00107283	1
Prkra	1	1.53846	0.430784	0.453	0.316	0.0010774	1
Stbd1	1	1.41172	0.34481	0.102	0	0.00110632	1
Gja6	1	1.60873	0.475444	0.239	0.095	0.00110659	1
Tacc1	1	0.762542	-0.271097	0.297	0.484	0.00110729	1
Ralbp1	1	0.753943	-0.282438	0.198	0.347	0.00110866	1
Golgb1	1	0.76876	-0.262976	0.07	0.168	0.00111176	1
2020-03-02	1	1.6164	0.480201	0.306	0.158	0.00111712	1
Cited4	1	1.6442	0.497255	0.292	0.147	0.00112388	1
Tbca	1	1.33992	0.292612	0.7	0.6	0.00116464	1
Tsg101	1	1.54339	0.43398	0.244	0.105	0.00120794	1
Daam2	1	0.761435	-0.27255	0.19	0.337	0.00122964	1
4930455G09Rik	1	1.4155	0.347483	0.158	0.032	0.00126683	1
Cdk1	1	1.47987	0.391953	0.289	0.137	0.00127392	1
Exoc3l2	1	0.706238	-0.347802	0.233	0.379	0.00131285	1
Slc11a2	1	0.74339	-0.296535	0.128	0.253	0.00135959	1
Folr1	1	1.60693	0.474326	0.51	0.389	0.00139425	1
Eif3j1	1	0.750481	-0.287042	0.139	0.263	0.00141798	1
Atp5g3	1	1.57458	0.453987	0.443	0.316	0.00147434	1
Nfe2l1	1	0.772731	-0.257825	0.165	0.305	0.00147905	1
Nid1	1	0.711064	-0.340993	0.102	0.211	0.00149225	1
Med31	1	1.55617	0.442228	0.367	0.221	0.00155665	1
Mpc1	1	1.50752	0.410463	0.262	0.116	0.00156247	1
Ubl5	1	1.32301	0.279911	0.78	0.684	0.00156704	1
Zfand5	1	0.776003	-0.253599	0.213	0.368	0.00159146	1
Tcf25	1	0.774729	-0.255242	0.33	0.505	0.00159866	1
Snx5	1	0.749509	-0.288337	0.149	0.274	0.00162431	1
Oaz2	1	1.48859	0.397831	0.49	0.358	0.00170702	1
Nop56	1	0.751762	-0.285335	0.112	0.221	0.0017904	1
Mtcl1	1	0.751396	-0.285822	0.067	0.158	0.00179506	1
Aars	1	0.665552	-0.407138	0.121	0.232	0.00180765	1
N6amt2	1	1.33861	0.291631	0.199	0.063	0.00183592	1
Vasn	1	0.748069	-0.29026	0.164	0.295	0.00184042	1
Elp5	1	1.55277	0.440042	0.417	0.284	0.0018652	1
Tarsl2	1	1.36241	0.309254	0.112	0.011	0.00196613	1
Srsf9	1	0.772747	-0.257804	0.302	0.484	0.00198126	1
G3bp1	1	0.755266	-0.280685	0.198	0.337	0.00206834	1
Rps15a	1	1.30021	0.262527	0.862	0.821	0.0020895	1
Parl	1	1.48911	0.398178	0.255	0.116	0.00213051	1
Fbxo31	1	0.775541	-0.254195	0.049	0.126	0.00213707	1
Aldoa	1	0.761657	-0.272259	0.677	0.768	0.00217444	1
Tbata	1	1.4081	0.342239	0.147	0.032	0.00218447	1
Slc26a2	1	0.766916	-0.265378	0.055	0.137	0.00220909	1
Gtf2b	1	0.763045	-0.270438	0.255	0.411	0.00220996	1
Trmt112	1	0.767806	-0.264218	0.198	0.337	0.00224494	1
Fbrsl1	1	0.752908	-0.283813	0.151	0.274	0.00226459	1
Atp1a2	1	0.68691	-0.375552	0.267	0.411	0.00229449	1
Sdc2	1	1.4888	0.397971	0.205	0.074	0.00231089	1
Chchd7	1	0.722694	-0.324769	0.288	0.442	0.00235587	1
Cdc42ep5	1	1.50294	0.407422	0.412	0.263	0.00236566	1
Rpl30	1	1.35405	0.303103	0.711	0.663	0.00237597	1
Rnf10	1	1.48229	0.393589	0.411	0.274	0.00245231	1
Tdrp	1	1.52317	0.420791	0.501	0.4	0.00255831	1
B4galnt1	1	0.755742	-0.280056	0.22	0.358	0.00255904	1
Chic2	1	1.4609	0.379054	0.386	0.242	0.00256858	1
Tmem14c	1	1.46948	0.38491	0.512	0.421	0.00257159	1
Tm2d1	1	0.758715	-0.276129	0.181	0.316	0.00261349	1
Stxbp2	1	1.49954	0.405159	0.154	0.042	0.00261599	1
Dohh	1	1.52249	0.420345	0.33	0.189	0.0026618	1
Znrf1	1	0.761453	-0.272527	0.063	0.147	0.00268145	1
Gramd1a	1	0.748959	-0.289071	0.143	0.263	0.00271496	1
Rras2	1	1.49796	0.404104	0.325	0.189	0.00274799	1
Gpi1	1	1.53541	0.428794	0.232	0.105	0.00277018	1
Gbas	1	1.54715	0.436417	0.289	0.158	0.00279891	1
Ppfibp2	1	1.52022	0.418853	0.153	0.042	0.00281725	1
Gna14	1	1.37223	0.316436	0.142	0.032	0.00285097	1
St5	1	0.757926	-0.277169	0.089	0.189	0.0028555	1
Pdk1	1	1.47486	0.38856	0.168	0.053	0.0029365	1
Enho	1	1.42843	0.356575	0.121	0.021	0.00300984	1
Acsl4	1	1.43356	0.360164	0.121	0.021	0.00305119	1
Mgat5	1	0.775303	-0.254502	0.098	0.2	0.00308045	1
Nhsl1	1	0.769504	-0.262009	0.05	0.126	0.00308714	1
Nqo2	1	1.38384	0.32486	0.138	0.032	0.00312219	1
Ufc1	1	1.48556	0.395792	0.402	0.263	0.00316265	1
Slc44a2	1	0.769488	-0.26203	0.211	0.358	0.00331944	1
Gart	1	0.754096	-0.282236	0.175	0.305	0.00332396	1
1110065P20Rik	1	1.53175	0.426411	0.469	0.368	0.00333201	1
Bri3bp	1	0.766982	-0.265292	0.045	0.116	0.00341576	1
Mlf2	1	0.742538	-0.297681	0.207	0.337	0.00343261	1
Hmgb1	1	0.715078	-0.335364	0.628	0.705	0.00350421	1
Pttg1	1	1.59445	0.466532	0.225	0.105	0.00356119	1
Med29	1	1.43594	0.361821	0.51	0.389	0.00358882	1
Ankrd39	1	1.42042	0.350956	0.153	0.042	0.00358884	1
Kctd13	1	1.47398	0.387968	0.462	0.358	0.0036142	1
Ppdpf	1	1.45628	0.375888	0.248	0.116	0.0037179	1
Syce3	1	1.42288	0.352686	0.213	0.084	0.00375796	1
Ostc	1	1.48929	0.398297	0.404	0.284	0.00387118	1
Spata33	1	1.4191	0.350026	0.677	0.653	0.00387986	1
Cox5b	1	1.32775	0.283483	0.724	0.695	0.003892	1
Trappc6a	1	0.778425	-0.250482	0.247	0.4	0.00390713	1
Mpdu1	1	1.5052	0.408926	0.322	0.2	0.00392787	1
Dtd2	1	1.47999	0.392036	0.407	0.295	0.00394477	1
G3bp2	1	1.43322	0.359924	0.483	0.347	0.00397379	1
Slc25a39	1	1.43774	0.363074	0.274	0.137	0.00400033	1
Ifngr2	1	0.738319	-0.303379	0.424	0.579	0.00414394	1
Cox6b1	1	1.33983	0.292541	0.688	0.642	0.00415993	1
Slc48a1	1	0.726813	-0.319086	0.168	0.284	0.00416436	1
Mrps6	1	1.42802	0.356292	0.606	0.579	0.00424541	1
Sat1	1	0.690579	-0.370225	0.127	0.232	0.00435365	1
Ctso	1	0.765284	-0.267508	0.169	0.295	0.00448224	1
Npl	1	0.753767	-0.282672	0.267	0.411	0.00448333	1
Gpr55	1	1.42752	0.35594	0.132	0.032	0.00455636	1
Fbxl19	1	0.775078	-0.254792	0.117	0.221	0.00456382	1
Nde1	1	1.38792	0.327808	0.115	0.021	0.00461778	1
Fam188a	1	0.749736	-0.288034	0.104	0.2	0.00462285	1
Coprs	1	1.4304	0.357951	0.13	0.032	0.00469136	1
Rnf20	1	0.774212	-0.255909	0.097	0.189	0.00472439	1
Anp32a	1	1.52389	0.421269	0.269	0.147	0.00483073	1
Tjp1	1	1.38168	0.323303	0.113	0.021	0.00493163	1
Gabarapl2	1	1.38451	0.325346	0.604	0.526	0.00498052	1
Klhl36	1	1.39036	0.329564	0.194	0.074	0.0050033	1
Fam49b	1	0.776025	-0.25357	0.235	0.379	0.00500884	1
Ywhah	1	1.36995	0.314778	0.615	0.589	0.00508927	1
Nfatc2ip	1	0.775334	-0.254461	0.312	0.474	0.00514391	1
Nucb2	1	0.765287	-0.267505	0.127	0.232	0.00524767	1
Trpc5os	1	0.773254	-0.257148	0.141	0.253	0.00524783	1
Pfdn5	1	1.30226	0.264103	0.851	0.832	0.00534039	1
Snap47	1	1.41735	0.348792	0.262	0.137	0.00575332	1
Wsb2	1	0.755672	-0.280148	0.169	0.284	0.00595773	1
Srp9	1	1.33882	0.291786	0.561	0.463	0.00608955	1
2020-09-10	1	1.42595	0.354841	0.142	0.042	0.00610747	1
Rps4x	1	1.45867	0.377525	0.49	0.389	0.00610798	1
Tpd52l1	1	1.39634	0.333853	0.565	0.442	0.00611454	1
Gas7	1	0.758214	-0.27679	0.224	0.358	0.00615287	1
Hsbp1	1	1.30344	0.265005	0.698	0.653	0.00619425	1
Arpc4	1	1.42172	0.351866	0.553	0.516	0.00619844	1
Cytip	1	1.39219	0.330879	0.157	0.053	0.00628814	1
Psmd9	1	0.745457	-0.293757	0.181	0.305	0.00645116	1
Mcfd2	1	1.48666	0.396532	0.379	0.263	0.00648768	1
Racgap1	1	0.76162	-0.272308	0.188	0.305	0.00663618	1
Prdx3	1	1.51865	0.417825	0.428	0.326	0.00673207	1
Nup62cl	1	1.42597	0.354851	0.259	0.137	0.00682965	1
Ccdc53	1	1.54754	0.436667	0.312	0.211	0.00687502	1
Abhd17a	1	1.43733	0.362787	0.535	0.453	0.00692278	1
Ube2l6	1	1.38452	0.325353	0.141	0.042	0.00696235	1
Hp1bp3	1	1.36877	0.313913	0.237	0.116	0.00721349	1
Gmcl1	1	1.36109	0.308286	0.124	0.032	0.00733735	1
Tmco2	1	1.56669	0.448963	0.211	0.105	0.00739659	1
Fth1	1	1.33115	0.286045	0.925	0.884	0.0074691	1
Swi5	1	1.32252	0.279538	0.653	0.589	0.00751617	1
Cox17	1	1.36899	0.314077	0.57	0.484	0.00768101	1
Nrbp1	1	1.33696	0.290399	0.183	0.074	0.00778117	1
Rasd1	1	0.741566	-0.298991	0.126	0.221	0.00781321	1
Gas6	1	1.57988	0.457349	0.457	0.358	0.00783258	1
Psmc6	1	1.44686	0.369396	0.191	0.084	0.0078647	1
Mpi	1	0.771777	-0.259059	0.154	0.263	0.00793438	1
Serp1	1	1.47508	0.388715	0.405	0.295	0.00794454	1
Agpat3	1	1.45174	0.372761	0.194	0.084	0.00802793	1
Fzd9	1	1.38705	0.327178	0.104	0.021	0.00828862	1
2020-09-07	1	1.50055	0.405831	0.267	0.158	0.00831097	1
Spint3	1	0.769591	-0.261896	0.085	0.168	0.00833273	1
Nrn1l	1	1.50715	0.410223	0.135	0.042	0.00836272	1
Sgta	1	1.41452	0.346791	0.229	0.116	0.00843488	1
Med9	1	1.30299	0.264659	0.52	0.421	0.00850248	1
Spcs1	1	1.31194	0.271505	0.673	0.642	0.00864912	1
Ifngr1	1	1.34463	0.296122	0.207	0.095	0.00877419	1
Snx7	1	1.39691	0.334264	0.266	0.147	0.00888019	1
Snrnp27	1	1.52922	0.42476	0.222	0.116	0.0090379	1
Etv5	1	1.31497	0.273811	0.136	0.042	0.00914452	1
Rpl22	1	1.31912	0.276967	0.708	0.653	0.00914701	1
Vma21	1	1.43788	0.363167	0.196	0.095	0.00925352	1
Mrpl57	1	1.39548	0.333241	0.471	0.368	0.00932264	1
Ninl	1	1.3773	0.320124	0.15	0.053	0.00951096	1
Ywhaq	1	1.30978	0.269859	0.753	0.737	0.00965241	1
Mfsd11	1	0.772212	-0.258497	0.109	0.2	0.00974497	1
Syap1	1	1.44661	0.369224	0.405	0.305	0.00993222	1
Prps1	1	1.3373	0.290656	0.177	0.074	0.00994963	1
Dhcr24	2	3.84741	1.3474	0.568	0.016	2.88571e-78	8.0794e-74
Serpina3a	2	9.0162	2.19902	0.947	0.171	9.33101e-73	2.6125e-68
Gm14226	2	6.38093	1.85331	0.842	0.119	1.31056e-70	3.66932e-66
Myl6b	2	6.45209	1.8644	0.874	0.147	5.02516e-65	1.40694e-60
Aqp8	2	5.94426	1.78243	0.895	0.188	3.40372e-56	9.52975e-52
Gm37350	2	8.38595	2.12656	0.884	0.222	7.97213e-56	2.23204e-51
Prnp	2	5.14234	1.63751	0.695	0.105	7.67882e-53	2.14991e-48
Gsta2	2	4.89283	1.58777	0.674	0.086	1.36462e-52	3.82067e-48
Rhox5	2	4.30409	1.45957	0.895	0.327	8.40577e-42	2.35345e-37
S100a1	2	6.54972	1.87942	0.589	0.094	1.19565e-41	3.34758e-37
Defb36	2	0.320775	-1.13701	0.884	0.984	7.09378e-36	1.98612e-31
1700031F05Rik	2	1.93438	0.659787	0.263	0.008	8.25701e-35	2.3118e-30
Ndrg4	2	1.98184	0.684027	0.295	0.014	1.73664e-34	4.86225e-30
Lgals1	2	0.0660044	-2.71803	0.158	0.797	2.33691e-33	6.54287e-29
Igfbp7	2	3.54369	1.26517	0.926	0.443	1.01977e-32	2.85515e-28
Ttc9b	2	2.40932	0.879343	0.253	0.01	3.96373e-32	1.10977e-27
Stmn1	2	2.85951	1.05065	0.989	0.598	1.11815e-31	3.13059e-27
Ctsl	2	3.14349	1.14533	0.989	0.951	6.08566e-31	1.70386e-26
Rhox8	2	2.48762	0.911326	1	0.892	6.75398e-31	1.89098e-26
Slc26a10	2	2.02729	0.7067	0.326	0.026	1.82041e-30	5.09679e-26
6030408B16Rik	2	2.66614	0.98063	0.558	0.109	2.32597e-29	6.51226e-25
Olfml3	2	2.52328	0.925561	0.505	0.085	4.57657e-29	1.28135e-24
Ly6c1	2	1.93433	0.65976	0.221	0.008	4.24304e-28	1.18797e-23
Mfge8	2	3.70225	1.30894	0.8	0.332	2.81074e-27	7.86951e-23
Serpina5	2	2.83788	1.04306	0.905	0.469	3.00461e-26	8.41231e-22
Ndrg1	2	2.20092	0.788874	0.421	0.064	3.4377e-26	9.62486e-22
Oat	2	2.66336	0.979587	0.642	0.188	4.16132e-25	1.16509e-20
Drd4	2	3.01779	1.10452	0.611	0.165	4.42173e-25	1.238e-20
Naglu	2	2.60159	0.956123	0.495	0.105	1.16329e-24	3.25699e-20
Fkbp4	2	0.297732	-1.21156	0.516	0.82	1.29182e-24	3.61684e-20
S100b	2	1.78635	0.580172	0.168	0.004	7.18627e-24	2.01201e-19
Cdc42ep4	2	2.04737	0.716557	0.326	0.04	7.58983e-24	2.125e-19
Corin	2	2.91938	1.07137	0.526	0.131	7.87182e-24	2.20395e-19
Gng8	2	2.57988	0.947741	0.242	0.019	2.06975e-23	5.79488e-19
Yipf1	2	2.37283	0.864083	0.768	0.263	2.54313e-23	7.12025e-19
Cdo1	2	2.22732	0.800797	0.411	0.074	2.73462e-23	7.65639e-19
Gpd1	2	2.24285	0.807745	0.484	0.104	4.30386e-23	1.205e-18
Eppin	2	2.30517	0.835154	0.968	0.615	7.34863e-23	2.05747e-18
U90926	2	1.93672	0.660996	0.316	0.04	1.88566e-22	5.27947e-18
H2-K1	2	2.3149	0.839368	0.789	0.326	2.75267e-22	7.70692e-18
Ivd	2	2.3185	0.84092	0.411	0.079	2.86104e-22	8.01033e-18
Mif4gd	2	2.6048	0.957356	0.621	0.19	2.89086e-22	8.09383e-18
Gstm6	2	2.32049	0.841779	0.905	0.461	2.94907e-22	8.25681e-18
Elovl2	2	2.22688	0.800601	0.653	0.195	9.19386e-22	2.5741e-17
Mapre2	2	1.5866	0.461594	0.179	0.008	1.73485e-21	4.85724e-17
Id2	2	2.2857	0.826671	0.474	0.108	2.48721e-21	6.9637e-17
Chchd10	2	0.494604	-0.703999	0.937	0.967	3.13686e-21	8.78258e-17
Uchl1	2	0.192401	-1.64817	0.158	0.644	7.62224e-21	2.13407e-16
Slc16a3	2	1.75132	0.560371	0.189	0.011	7.95342e-21	2.2268e-16
Hmgn3	2	2.62807	0.96625	0.632	0.224	9.83309e-21	2.75307e-16
Ms4a18	2	1.61253	0.477806	0.126	0.001	3.57779e-20	1.00171e-15
Mt1	2	1.78471	0.579257	1	0.963	3.72858e-20	1.04393e-15
Ano1	2	1.80078	0.588223	0.253	0.027	4.55762e-20	1.27604e-15
Pbk	2	1.87587	0.629073	0.4	0.078	6.68306e-20	1.87112e-15
Tpx2	2	2.41025	0.87973	0.4	0.083	8.24292e-20	2.30785e-15
Fxyd6	2	0.267317	-1.31932	0.179	0.67	9.57677e-20	2.6813e-15
Actn3	2	2.15549	0.768016	0.358	0.065	1.05014e-19	2.94018e-15
Shf	2	1.73612	0.55165	0.221	0.02	1.4471e-19	4.05159e-15
Hmgb3	2	2.12173	0.752234	0.874	0.447	1.59809e-19	4.47433e-15
Ptgds	2	3.29812	1.19335	0.874	0.656	1.96143e-19	5.49162e-15
Arhgap31	2	1.69022	0.524857	0.179	0.011	2.43882e-19	6.82822e-15
Scara3	2	1.6999	0.530571	0.221	0.02	3.51464e-19	9.84028e-15
Psap	2	2.32538	0.843882	0.958	0.696	4.05127e-19	1.13427e-14
Chchd2	2	0.5329	-0.629422	0.989	0.984	5.95016e-19	1.66593e-14
Tmem189	2	2.04767	0.716701	0.284	0.041	6.79538e-19	1.90257e-14
Pros1	2	2.17173	0.775523	0.558	0.164	7.53786e-19	2.11045e-14
Ndufv3	2	0.25831	-1.3536	0.168	0.633	7.63522e-19	2.13771e-14
Galc	2	1.46383	0.381057	0.189	0.014	8.73188e-19	2.44475e-14
Aspn	2	1.37794	0.32059	0.105	0	1.03998e-18	2.91173e-14
Dpysl4	2	1.9931	0.689693	0.337	0.06	1.17905e-18	3.30112e-14
8030411F24Rik	2	0.358509	-1.0258	0.547	0.802	1.18737e-18	3.32441e-14
Nkpd1	2	1.64321	0.496651	0.126	0.003	1.41456e-18	3.96048e-14
Fam110c	2	1.36258	0.309381	0.116	0.001	1.88796e-18	5.28592e-14
Amy1	2	2.09421	0.739177	0.284	0.042	2.26213e-18	6.33351e-14
Camk2n2	2	1.55612	0.442193	0.179	0.012	2.86599e-18	8.0242e-14
Myh13	2	1.49244	0.400409	0.158	0.008	3.0782e-18	8.61834e-14
Cd81	2	2.67489	0.983909	0.895	0.559	3.67816e-18	1.02981e-13
Fuca1	2	2.29657	0.831416	0.916	0.718	3.80941e-18	1.06656e-13
Tspan17	2	0.265959	-1.32441	0.137	0.596	5.05454e-18	1.41517e-13
Art3	2	2.01851	0.702358	0.463	0.117	6.68999e-18	1.87306e-13
Htatsf1	2	2.27571	0.82229	0.663	0.254	7.4786e-18	2.09386e-13
Slc25a4	2	0.359274	-1.02367	0.463	0.774	8.88026e-18	2.4863e-13
Spink8	2	1.78184	0.577645	0.232	0.027	9.02122e-18	2.52576e-13
Tmed3	2	2.01857	0.70239	0.916	0.613	9.81234e-18	2.74726e-13
Gpc4	2	2.38261	0.868197	0.526	0.162	1.24842e-17	3.49532e-13
Sh2d4a	2	1.93097	0.65802	0.326	0.06	1.6415e-17	4.59587e-13
Ptgr1	2	0.300691	-1.20167	0.189	0.628	2.84108e-17	7.95445e-13
Adam8	2	1.68456	0.521507	0.126	0.004	4.63542e-17	1.29783e-12
Slc7a4	2	2.252	0.811821	0.705	0.296	4.89368e-17	1.37013e-12
Amhr2	2	1.84464	0.612282	1	0.903	5.19441e-17	1.45433e-12
Calr	2	2.14135	0.761439	0.937	0.733	6.05549e-17	1.69541e-12
Gaa	2	2.13116	0.756665	0.421	0.105	6.60383e-17	1.84894e-12
4930481A15Rik	2	1.4892	0.39824	0.105	0.001	8.60782e-17	2.41002e-12
Ctsd	2	2.25422	0.812802	0.684	0.296	9.9515e-17	2.78622e-12
Gm2a	2	0.444557	-0.810678	0.853	0.937	1.43359e-16	4.01375e-12
Ttyh1	2	2.25981	0.815282	0.716	0.33	1.61062e-16	4.50941e-12
Pex1	2	1.60114	0.470716	0.158	0.011	2.01928e-16	5.65359e-12
Svs5	2	2.18234	0.780396	0.432	0.116	2.07154e-16	5.7999e-12
Fndc5	2	1.95895	0.672409	0.621	0.229	3.21626e-16	9.00489e-12
Cst9	2	1.48255	0.393766	1	0.988	3.26179e-16	9.13236e-12
Tubgcp5	2	1.61066	0.476645	0.2	0.022	5.05859e-16	1.4163e-11
Siva1	2	0.294722	-1.22172	0.084	0.547	5.74015e-16	1.60713e-11
Tmprss6	2	1.35647	0.304889	0.147	0.01	1.11221e-15	3.11395e-11
Sfxn3	2	1.74729	0.558066	0.4	0.098	1.80203e-15	5.04532e-11
N4bp3	2	1.69615	0.528359	0.2	0.023	1.88567e-15	5.2795e-11
Cldn11	2	1.81523	0.59621	0.968	0.846	2.00284e-15	5.60755e-11
Rgs2	2	1.91842	0.651504	0.421	0.115	2.19118e-15	6.13485e-11
Adgrl1	2	1.83542	0.607275	0.4	0.102	2.69077e-15	7.53361e-11
Tmem52	2	2.15965	0.769946	0.653	0.282	2.77525e-15	7.77014e-11
Maged1	2	1.96196	0.673944	0.895	0.617	3.2739e-15	9.16625e-11
Galnt18	2	1.54718	0.436436	0.179	0.018	3.31943e-15	9.29375e-11
Hsd17b1	2	1.44356	0.367113	0.105	0.003	3.65385e-15	1.02301e-10
Prlr	2	1.32623	0.282341	0.105	0.003	4.28004e-15	1.19833e-10
Clip3	2	1.32875	0.284241	0.105	0.003	4.35582e-15	1.21954e-10
Acat1	2	1.9261	0.655497	0.505	0.171	5.26075e-15	1.47291e-10
Atox1	2	0.461951	-0.772295	0.695	0.857	6.03661e-15	1.69013e-10
Cmtm3	2	1.77679	0.57481	0.368	0.086	6.30153e-15	1.7643e-10
Cadm1	2	2.06054	0.72297	0.789	0.435	7.3116e-15	2.0471e-10
Chit1	2	1.60834	0.475203	0.211	0.027	8.02008e-15	2.24546e-10
Serf1	2	0.473293	-0.748041	0.653	0.858	9.73805e-15	2.72646e-10
Svs6	2	1.58747	0.462141	0.158	0.014	1.01009e-14	2.82805e-10
Ctsa	2	1.79762	0.586463	0.337	0.075	1.16508e-14	3.26198e-10
Tspan8	2	1.5458	0.435541	0.126	0.007	1.16742e-14	3.26853e-10
Fuca2	2	2.34743	0.853322	0.642	0.285	1.35258e-14	3.78696e-10
H2afx	2	1.85915	0.62012	0.411	0.112	1.49674e-14	4.19057e-10
Qpct	2	1.86323	0.622312	0.937	0.67	1.55284e-14	4.34764e-10
Clu	2	1.78173	0.577585	1	0.947	1.70066e-14	4.7615e-10
Serpini1	2	2.01594	0.701087	0.389	0.106	3.23284e-14	9.05132e-10
Kdsr	2	1.7974	0.586343	0.379	0.098	4.91915e-14	1.37726e-09
Cldn23	2	1.56523	0.448031	0.147	0.012	6.37114e-14	1.78379e-09
Defb45	2	2.01609	0.70116	0.979	0.801	8.08077e-14	2.26245e-09
Cmtm6	2	1.96197	0.673951	0.526	0.198	9.67959e-14	2.71009e-09
Adgrg1	2	2.19059	0.784171	0.432	0.136	1.06578e-13	2.98398e-09
Dbi	2	0.491757	-0.70977	0.663	0.85	1.22822e-13	3.43877e-09
Bbx	2	2.20892	0.792503	0.653	0.31	1.68362e-13	4.71381e-09
Itm2b	2	1.63376	0.490886	1	0.849	2.28668e-13	6.40223e-09
Ppm1m	2	0.319895	-1.13976	0.053	0.441	2.55336e-13	7.14891e-09
Ftl1	2	1.99617	0.691229	0.958	0.801	3.22445e-13	9.02781e-09
Sec62	2	2.05097	0.718311	0.779	0.453	3.92042e-13	1.09764e-08
Hspa5	2	2.02585	0.705992	0.842	0.583	4.34924e-13	1.2177e-08
Dnajc9	2	1.79842	0.586911	0.368	0.1	4.59295e-13	1.28593e-08
Cyth2	2	2.01294	0.699597	0.779	0.464	5.20728e-13	1.45793e-08
Cyb5a	2	0.406966	-0.899027	0.305	0.662	6.04585e-13	1.69272e-08
Gnai2	2	1.82723	0.602801	0.863	0.518	7.46339e-13	2.0896e-08
Erp29	2	1.87533	0.628785	0.926	0.719	7.75896e-13	2.17235e-08
Sema3c	2	2.02244	0.704304	0.326	0.083	7.89764e-13	2.21118e-08
Dixdc1	2	1.52962	0.425022	0.189	0.027	8.39904e-13	2.35156e-08
Maged2	2	1.81144	0.594125	0.758	0.4	9.18e-13	2.57022e-08
Hmbs	2	1.86248	0.621909	0.484	0.173	1.10819e-12	3.10271e-08
Asah1	2	1.9333	0.659228	0.526	0.203	1.12805e-12	3.15832e-08
Zfyve27	2	1.69574	0.528121	0.232	0.042	1.1801e-12	3.30404e-08
Lamp1	2	1.87281	0.627439	0.8	0.484	2.14852e-12	6.01543e-08
Calr4	2	1.84226	0.610995	0.432	0.143	2.40098e-12	6.72225e-08
Atp6ap2	2	1.90635	0.645188	0.516	0.191	3.13059e-12	8.76501e-08
Creg1	2	1.80681	0.591564	0.842	0.595	3.16742e-12	8.86813e-08
Mgarp	2	0.379648	-0.96851	0.116	0.509	3.62915e-12	1.01609e-07
Alcam	2	1.31401	0.273084	0.116	0.008	4.53025e-12	1.26838e-07
Dct	2	1.39111	0.330104	0.126	0.011	4.85415e-12	1.35907e-07
Sdhb	2	1.84446	0.612188	0.705	0.329	4.94529e-12	1.38458e-07
Pfdn1	2	0.421386	-0.864205	0.347	0.638	5.31091e-12	1.48695e-07
Sil1	2	1.76688	0.569218	0.505	0.187	5.32935e-12	1.49211e-07
Clic1	2	0.491234	-0.710835	0.516	0.782	6.05996e-12	1.69667e-07
Ank	2	1.80157	0.588657	0.242	0.05	6.13298e-12	1.71711e-07
4930502E18Rik	2	1.79841	0.586901	0.347	0.1	6.37179e-12	1.78397e-07
Aldh1a7	2	1.372	0.316268	0.147	0.016	7.51009e-12	2.10267e-07
Aldh1a1	2	1.88258	0.632642	0.768	0.453	7.8081e-12	2.18611e-07
1700019B21Rik	2	0.479293	-0.735443	0.505	0.831	9.68333e-12	2.71114e-07
1700024P16Rik	2	1.65357	0.502938	0.253	0.056	1.03717e-11	2.90386e-07
Bik	2	0.34068	-1.07681	0.063	0.427	1.08006e-11	3.02396e-07
Pomp	2	0.424362	-0.857168	0.442	0.678	1.53988e-11	4.31135e-07
Hmgn5	2	2.11302	0.748117	0.632	0.326	1.70087e-11	4.7621e-07
Bscl2	2	1.82804	0.603244	0.579	0.256	1.97191e-11	5.52096e-07
Rhbdf2	2	1.45725	0.376552	0.147	0.018	2.2263e-11	6.23321e-07
Sf3b2	2	1.83258	0.605725	0.516	0.206	2.51311e-11	7.0362e-07
Entpd1	2	1.34626	0.297334	0.116	0.01	2.63713e-11	7.38344e-07
Arxes2	2	1.8588	0.619929	0.6	0.286	2.88895e-11	8.08849e-07
Tst	2	0.472857	-0.748963	0.347	0.694	3.13535e-11	8.77837e-07
Smco4	2	1.53942	0.431404	0.326	0.087	3.49956e-11	9.79806e-07
Cox5a	2	0.558384	-0.582709	0.737	0.864	3.523e-11	9.8637e-07
Akr1b3	2	1.61497	0.479316	0.958	0.843	3.6328e-11	1.01711e-06
Fgfrl1	2	1.50623	0.409608	0.158	0.022	3.84776e-11	1.0773e-06
Gatm	2	1.47987	0.391954	0.989	0.906	4.1431e-11	1.15999e-06
Cpe	2	1.7163	0.540169	0.832	0.467	4.20805e-11	1.17817e-06
Sh3gl3	2	0.370226	-0.993641	0.021	0.359	4.21142e-11	1.17911e-06
Rpl11	2	0.598842	-0.512757	0.8	0.928	4.27399e-11	1.19663e-06
Myo10	2	1.76376	0.567447	0.442	0.156	4.51183e-11	1.26322e-06
Ero1l	2	1.6295	0.488273	0.211	0.041	5.12975e-11	1.43623e-06
Hist3h2a	2	1.69647	0.528549	0.284	0.074	5.79749e-11	1.62318e-06
Gm9112	2	0.585859	-0.534676	0.874	0.944	6.56593e-11	1.83833e-06
Wipf3	2	1.82189	0.599872	0.453	0.172	7.4137e-11	2.07569e-06
Fndc3b	2	1.55383	0.44072	0.274	0.067	7.50276e-11	2.10062e-06
Rgma	2	1.70716	0.534829	0.189	0.034	7.70621e-11	2.15758e-06
Rcn1	2	1.68708	0.522998	0.242	0.055	8.21282e-11	2.29943e-06
Cited1	2	1.54126	0.432602	0.968	0.823	8.27846e-11	2.3178e-06
Tmem255a	2	0.366914	-1.00263	0.032	0.374	8.52556e-11	2.38699e-06
Atp1a1	2	1.63135	0.48941	0.8	0.412	1.05515e-10	2.95421e-06
Slc29a1	2	1.71899	0.541735	0.484	0.191	1.55636e-10	4.35749e-06
Gstm1	2	1.45898	0.377735	0.968	0.884	1.56433e-10	4.37982e-06
Cdkn2b	2	1.66354	0.50895	0.274	0.071	1.59288e-10	4.45976e-06
Fam181b	2	1.62045	0.482703	0.316	0.09	1.6455e-10	4.60708e-06
Tom1l1	2	1.6028	0.471754	0.242	0.056	1.82546e-10	5.11091e-06
Wfdc9	2	1.72601	0.545812	0.305	0.086	2.51599e-10	7.04426e-06
Qsox1	2	1.88177	0.63221	0.663	0.337	2.84488e-10	7.9651e-06
Sod3	2	0.345664	-1.06229	0.116	0.432	3.74375e-10	1.04818e-05
Pycard	2	1.50705	0.410153	0.189	0.035	3.86721e-10	1.08274e-05
Acsbg1	2	1.81749	0.597455	0.695	0.398	3.9596e-10	1.10861e-05
Myzap	2	1.55687	0.442675	0.242	0.059	4.66508e-10	1.30613e-05
D730048I06Rik	2	1.42494	0.354132	0.137	0.018	4.67582e-10	1.30914e-05
Atpif1	2	0.613002	-0.489387	0.832	0.913	4.81146e-10	1.34711e-05
Mid1ip1	2	1.78945	0.581908	0.453	0.183	5.06492e-10	1.41808e-05
Tmem206	2	1.80393	0.589969	0.432	0.164	5.84884e-10	1.63756e-05
Pttg1ip	2	1.71959	0.542086	0.695	0.389	8.48827e-10	2.37655e-05
Ajuba	2	1.58046	0.457713	0.263	0.07	1.12992e-09	3.16355e-05
Lrpap1	2	1.82455	0.601331	0.716	0.427	1.14154e-09	3.1961e-05
Wfdc1	2	0.380766	-0.965571	0.105	0.432	1.60421e-09	4.49148e-05
Cdk20	2	1.36607	0.311936	0.137	0.019	1.70641e-09	4.77761e-05
Arf5	2	0.546029	-0.605083	0.674	0.789	1.76249e-09	4.93462e-05
Rgcc	2	1.7203	0.5425	0.484	0.207	1.91974e-09	5.3749e-05
Rnd2	2	0.400128	-0.91597	0.011	0.308	1.96555e-09	5.50313e-05
BC022687	2	1.73177	0.549144	0.442	0.179	2.03297e-09	5.6919e-05
Cidea	2	0.387954	-0.94687	0.147	0.469	2.13048e-09	5.96492e-05
Tgfbr3l	2	1.31326	0.272512	0.116	0.014	2.45041e-09	6.86064e-05
Pigs	2	1.59974	0.46984	0.358	0.123	2.61765e-09	7.32889e-05
Arnt2	2	1.42534	0.354413	0.105	0.011	2.65391e-09	7.43042e-05
Ebp	2	1.65715	0.505099	0.705	0.392	3.09064e-09	8.65317e-05
Jam2	2	1.74062	0.554239	0.274	0.08	3.13071e-09	8.76536e-05
C1qtnf6	2	1.35592	0.304482	0.105	0.011	3.27081e-09	9.15762e-05
1810037I17Rik	2	0.516592	-0.660502	0.6	0.73	3.35957e-09	9.40612e-05
Tmem59	2	1.71559	0.539759	0.821	0.54	3.37384e-09	9.44609e-05
Hspb1	2	1.69086	0.525235	0.947	0.789	4.21835e-09	0.000118105
Drap1	2	1.7704	0.571207	0.505	0.237	4.36098e-09	0.000122099
Slc41a3	2	1.74682	0.557797	0.358	0.131	4.44776e-09	0.000124528
Slc22a17	2	1.71909	0.541794	0.295	0.091	4.75424e-09	0.000133109
Pld3	2	1.855	0.617882	0.611	0.336	4.94286e-09	0.00013839
Spint2	2	0.560925	-0.578168	0.632	0.795	5.29689e-09	0.000148302
Epn1	2	1.67317	0.514721	0.474	0.209	5.51819e-09	0.000154498
Pja1	2	1.63055	0.48892	0.558	0.255	6.20283e-09	0.000173667
Dhrs7	2	0.451618	-0.794919	0.095	0.407	6.55491e-09	0.000183524
Dip2b	2	1.53275	0.427065	0.242	0.065	6.84131e-09	0.000191543
Gnptg	2	1.47203	0.386644	0.274	0.078	7.1347e-09	0.000199757
Slc13a2	2	1.39252	0.331115	0.147	0.025	7.47193e-09	0.000209199
1810058I24Rik	2	0.577199	-0.549568	0.716	0.831	7.96972e-09	0.000223136
1500009L16Rik	2	0.462669	-0.770743	0.316	0.577	9.31083e-09	0.000260685
Zfp385a	2	1.64452	0.497449	0.284	0.089	9.50343e-09	0.000266077
Neu1	2	1.58398	0.459944	0.316	0.104	1.01664e-08	0.00028464
Fkbp9	2	1.74872	0.558887	0.284	0.091	1.17507e-08	0.000328996
Gnai1	2	1.58736	0.46207	0.232	0.063	1.27783e-08	0.000357767
Uxs1	2	1.77083	0.571446	0.653	0.405	1.40284e-08	0.000392766
Mgst1	2	0.496212	-0.700752	0.326	0.596	1.42428e-08	0.000398771
Rab3b	2	1.621	0.483045	0.295	0.095	1.42775e-08	0.000399741
Amigo2	2	1.51969	0.418507	0.137	0.023	1.55027e-08	0.000434044
Ndufa6	2	0.550455	-0.59701	0.663	0.76	1.62649e-08	0.000455384
Noa1	2	1.40029	0.336679	0.211	0.052	1.7555e-08	0.000491505
Sptbn1	2	1.58056	0.457778	0.253	0.072	1.75985e-08	0.000492722
Ar	2	1.3192	0.277029	0.126	0.019	1.83663e-08	0.00051422
Sbk1	2	1.5468	0.436188	0.263	0.079	1.95149e-08	0.000546378
Ap2m1	2	1.7759	0.574305	0.684	0.411	1.97579e-08	0.000553181
Pla2g7	2	0.37534	-0.979923	0.074	0.348	1.99048e-08	0.000557295
Plin2	2	1.51128	0.412959	0.189	0.044	2.01465e-08	0.000564063
Wnt6	2	1.73894	0.553274	0.379	0.15	2.03878e-08	0.000570819
Mylk	2	1.74032	0.554068	0.505	0.246	2.0893e-08	0.000584961
Pde4b	2	1.49134	0.399677	0.211	0.053	2.40805e-08	0.000674206
Aard	2	1.31571	0.274374	1	0.967	2.57149e-08	0.000719965
Hmg20b	2	0.481961	-0.729893	0.337	0.569	2.96419e-08	0.000829915
Dip2a	2	1.30262	0.264376	0.116	0.016	2.99924e-08	0.000839726
Tgoln1	2	1.76369	0.567408	0.432	0.195	3.01705e-08	0.000844715
Zfp280b	2	1.33487	0.288831	0.116	0.016	3.13951e-08	0.000878999
Kdelr2	2	0.412692	-0.885055	0.2	0.475	3.15975e-08	0.000884666
Fabp5	2	1.50815	0.410883	0.611	0.296	3.24739e-08	0.000909203
Slc7a6	2	1.52061	0.419114	0.242	0.07	3.26922e-08	0.000915316
Tspan4	2	1.45594	0.375654	0.126	0.02	3.78792e-08	0.00106054
Rpl13	2	0.680411	-0.385059	0.958	0.969	3.95319e-08	0.00110681
Tceal3	2	1.44835	0.370422	0.105	0.014	4.01304e-08	0.00112357
Slc39a7	2	1.49183	0.400005	0.4	0.154	4.11975e-08	0.00115345
Abracl	2	1.61061	0.476613	0.537	0.28	4.24109e-08	0.00118742
H2afj	2	1.77926	0.576198	0.611	0.357	4.70628e-08	0.00131766
Hn1	2	0.601355	-0.50857	0.632	0.783	4.90138e-08	0.00137229
Ddah2	2	0.445372	-0.808846	0.105	0.372	5.04417e-08	0.00141227
Hexa	2	1.67988	0.518721	0.789	0.491	5.34519e-08	0.00149655
C1qbp	2	1.54363	0.434136	0.621	0.317	5.52941e-08	0.00154812
Ncapd2	2	1.45145	0.372566	0.2	0.05	5.71122e-08	0.00159903
Fam53a	2	1.6223	0.483845	0.389	0.16	5.75441e-08	0.00161112
Mkl2	2	1.35575	0.304355	0.168	0.037	5.95735e-08	0.00166794
Alad	2	1.65754	0.505337	0.8	0.54	6.03245e-08	0.00168897
Akt2	2	1.57651	0.455215	0.347	0.13	6.08454e-08	0.00170355
Fut8	2	1.41753	0.348916	0.242	0.07	6.30888e-08	0.00176636
Atp5h	2	0.61787	-0.481477	0.842	0.861	6.35195e-08	0.00177842
Mfsd7c	2	1.49485	0.402027	0.295	0.098	6.52451e-08	0.00182673
Mxra7	2	0.471119	-0.752644	0.021	0.28	6.54149e-08	0.00183149
Akap12	2	1.68308	0.520626	0.747	0.492	6.84228e-08	0.0019157
Nenf	2	1.49817	0.404247	0.926	0.741	7.79394e-08	0.00218215
Rpl38	2	0.675408	-0.392438	0.863	0.926	7.82333e-08	0.00219038
2700060E02Rik	2	0.509821	-0.673695	0.274	0.543	9.75417e-08	0.00273097
Rpl6	2	0.592801	-0.522896	0.621	0.772	1.00956e-07	0.00282656
Scand1	2	0.535762	-0.624065	0.432	0.647	1.08659e-07	0.00304224
Slc30a5	2	1.42748	0.355914	0.168	0.038	1.10801e-07	0.00310219
Rpl14	2	0.645738	-0.437362	0.832	0.896	1.1597e-07	0.00324693
Wbp2	2	1.61789	0.481126	0.453	0.209	1.21359e-07	0.00339781
Efhd1	2	0.508414	-0.67646	0.2	0.484	1.2596e-07	0.00352663
Zwint	2	1.61599	0.479947	0.589	0.308	1.3166e-07	0.00368623
Arl6ip1	2	1.62464	0.485284	0.821	0.604	1.32589e-07	0.00371222
Fam213a	2	0.478205	-0.737716	0.263	0.508	1.32875e-07	0.00372024
Tsx	2	1.43808	0.363306	0.937	0.88	1.38403e-07	0.003875
Marcks	2	1.75125	0.560329	0.568	0.318	1.38714e-07	0.00388371
Tnik	2	1.3711	0.315613	0.274	0.087	1.46641e-07	0.00410566
Atp1b3	2	1.46636	0.382783	0.474	0.217	1.67572e-07	0.00469167
Nhp2	2	1.65183	0.501885	0.726	0.517	1.68644e-07	0.00472169
Apoa2	2	1.96735	0.676687	0.526	0.291	1.6928e-07	0.00473951
Adora1	2	1.52587	0.422564	0.421	0.18	1.70156e-07	0.00476402
Isoc2b	2	0.423114	-0.860113	0.011	0.25	1.76562e-07	0.00494338
Cotl1	2	0.488529	-0.716357	0.053	0.311	1.77921e-07	0.00498143
Ndufc1	2	0.546465	-0.604285	0.589	0.724	1.80965e-07	0.00506665
Fam134b	2	1.49078	0.399298	0.253	0.08	1.83267e-07	0.00513111
Eef1d	2	1.57002	0.451091	0.758	0.514	2.06376e-07	0.0057781
Prdx5	2	0.536551	-0.622595	0.232	0.488	2.10249e-07	0.00588654
Tiam1	2	1.54459	0.434757	0.295	0.106	2.11263e-07	0.00591495
Vsig10	2	1.47578	0.389187	0.242	0.075	2.23678e-07	0.00626252
Mfsd10	2	1.44612	0.368884	0.211	0.059	2.2718e-07	0.00636057
Med10	2	0.648787	-0.432651	0.789	0.858	2.40976e-07	0.00674685
Dll3	2	1.56158	0.445701	0.2	0.055	2.46102e-07	0.00689036
Stard5	2	1.35055	0.300514	0.126	0.023	2.51714e-07	0.00704749
Tubb3	2	0.473355	-0.747909	0.4	0.598	2.56862e-07	0.00719163
Cln5	2	1.36347	0.310032	0.158	0.035	2.73836e-07	0.00766687
Polr1d	2	0.57217	-0.558319	0.526	0.69	2.83699e-07	0.00794301
Myo5b	2	1.36854	0.313746	0.158	0.035	2.87409e-07	0.00804688
Kctd12	2	1.49413	0.401543	0.263	0.089	2.98065e-07	0.00834524
Hspd1	2	1.65826	0.505767	0.526	0.266	3.0297e-07	0.00848254
Rpl17	2	0.629523	-0.462793	0.789	0.812	3.03081e-07	0.00848567
1700011M02Rik	2	0.704106	-0.350826	0.968	0.955	3.15131e-07	0.00882302
Tyro3	2	1.69001	0.524733	0.389	0.168	3.36193e-07	0.00941272
Ccdc28b	2	0.46165	-0.772947	0.137	0.386	3.50136e-07	0.00980311
Gab1	2	1.33361	0.28789	0.147	0.031	3.57067e-07	0.00999716
Atp6v0b	2	1.67213	0.514097	0.747	0.525	3.67414e-07	0.0102868
Dusp15	2	1.57594	0.45485	0.326	0.131	3.94356e-07	0.0110412
Lamp2	2	1.49699	0.403454	0.358	0.147	4.38868e-07	0.0122874
Pcsk1n	2	0.563794	-0.573066	0.6	0.753	4.44776e-07	0.0124528
Galnt1	2	1.57278	0.452842	0.379	0.165	4.60163e-07	0.0128836
Slc26a7	2	1.48811	0.39751	0.284	0.098	4.89636e-07	0.0137088
Tcn2	2	1.3074	0.268038	0.2	0.055	5.15139e-07	0.0144229
Gabarapl1	2	1.39683	0.334209	0.758	0.431	5.34636e-07	0.0149687
Pdia3	2	1.54209	0.433138	0.8	0.58	5.51931e-07	0.015453
Rpn2	2	1.51513	0.4155	0.726	0.446	5.63147e-07	0.015767
Sphk2	2	1.51277	0.413941	0.358	0.147	5.75662e-07	0.0161174
Dhx32	2	1.46756	0.383598	0.411	0.177	5.84447e-07	0.0163633
Mmp14	2	1.53893	0.43109	0.305	0.113	5.9934e-07	0.0167803
Gba	2	1.65346	0.50287	0.305	0.119	6.09955e-07	0.0170775
Minos1	2	0.623232	-0.472836	0.811	0.824	6.38236e-07	0.0178693
Slc9a3r1	2	0.473242	-0.748149	0.063	0.296	6.43959e-07	0.0180296
Tns3	2	1.38854	0.32825	0.158	0.038	6.79549e-07	0.019026
Cmc2	2	1.60658	0.474108	0.537	0.278	6.8753e-07	0.0192495
Cdc73	2	1.51323	0.414247	0.274	0.098	7.04548e-07	0.0197259
Zfp410	2	1.35546	0.304144	0.189	0.052	7.50159e-07	0.0210029
Psmd2	2	1.41931	0.350172	0.705	0.411	7.64131e-07	0.0213941
Higd1a	2	0.528203	-0.638274	0.4	0.585	7.76991e-07	0.0217542
Bcr	2	1.32031	0.27787	0.126	0.025	7.99302e-07	0.0223788
Os9	2	1.64552	0.498058	0.463	0.222	8.77351e-07	0.0245641
Neo1	2	1.42225	0.352243	0.295	0.106	8.8056e-07	0.0246539
Baz1a	2	1.68307	0.520618	0.347	0.145	9.91402e-07	0.0277573
Cdc42	2	0.58622	-0.534059	0.453	0.644	1.00738e-06	0.0282048
Islr2	2	1.44924	0.371042	0.168	0.044	1.03027e-06	0.0288454
Sowahd	2	0.515192	-0.663216	0.011	0.224	1.05167e-06	0.0294446
Gpr108	2	1.40004	0.336499	0.263	0.09	1.0652e-06	0.0298235
Etl4	2	1.45148	0.372585	0.189	0.055	1.08485e-06	0.0303736
Ndufs5	2	0.607441	-0.498501	0.579	0.711	1.12857e-06	0.0315978
Tpm1	2	1.33732	0.290669	0.189	0.053	1.25943e-06	0.0352615
Ppt1	2	1.53979	0.431645	0.884	0.804	1.28133e-06	0.0358746
Tsc22d1	2	1.50501	0.408802	0.8	0.587	1.2945e-06	0.0362434
Med4	2	1.51795	0.417363	0.411	0.191	1.32813e-06	0.0371851
Rnaset2a	2	0.516814	-0.660073	0.116	0.357	1.36167e-06	0.0381241
Man1a2	2	1.53628	0.429366	0.263	0.097	1.41305e-06	0.0395625
Pgrmc1	2	1.57667	0.455316	0.811	0.636	1.42047e-06	0.0397702
Aldh1a2	2	1.45844	0.377368	0.147	0.035	1.48305e-06	0.0415225
Slc52a2	2	1.58002	0.457439	0.232	0.078	1.48396e-06	0.041548
Psmb5	2	0.58435	-0.537256	0.484	0.638	1.50618e-06	0.04217
Bax	2	1.52964	0.425031	0.421	0.199	1.54182e-06	0.043168
Uckl1os	2	1.30306	0.264717	0.116	0.022	1.62574e-06	0.0455174
Rnpep	2	1.33821	0.29133	0.221	0.07	1.63273e-06	0.0457132
Sel1l	2	1.39271	0.331248	0.2	0.06	1.7325e-06	0.0485064
Bag2	2	1.61214	0.477564	0.411	0.203	1.75213e-06	0.0490562
Pigt	2	1.47127	0.386128	0.611	0.364	1.78876e-06	0.0500816
Tox	2	1.35334	0.302572	0.168	0.045	1.84163e-06	0.0515621
Aldh1b1	2	0.493499	-0.706235	0.042	0.256	1.84717e-06	0.051717
Chpf	2	1.45413	0.374407	0.579	0.326	1.86214e-06	0.0521362
Hsp90b1	2	1.47476	0.388497	0.842	0.667	1.99523e-06	0.0558626
Emc3	2	1.35852	0.306393	0.368	0.154	2.00262e-06	0.0560695
Trim26	2	1.49502	0.402137	0.284	0.109	2.03419e-06	0.0569533
Hmgcs2	2	1.57603	0.454907	0.284	0.112	2.09173e-06	0.0585642
Abat	2	1.36214	0.309057	0.326	0.13	2.24977e-06	0.062989
Rpl39	2	0.605274	-0.502074	0.663	0.782	2.25021e-06	0.0630015
Prkcsh	2	1.54122	0.432575	0.547	0.297	2.25214e-06	0.0630554
Fez2	2	0.515146	-0.663305	0.063	0.282	2.25371e-06	0.0630995
Xkr8	2	1.42025	0.350834	0.179	0.052	2.34316e-06	0.0656038
Smarca2	2	1.61157	0.477208	0.379	0.173	2.40388e-06	0.067304
B3gnt8	2	1.32974	0.284985	0.179	0.05	2.66888e-06	0.0747233
Tmx2	2	1.50538	0.409046	0.547	0.312	2.76791e-06	0.077496
Rps6	2	0.649756	-0.431158	0.695	0.757	2.83799e-06	0.0794581
Cox7c	2	0.688598	-0.373098	0.8	0.869	3.03913e-06	0.0850896
Oaz1	2	0.661169	-0.413745	0.832	0.85	3.04366e-06	0.0852163
Dnajb9	2	1.51378	0.41461	0.4	0.19	3.09041e-06	0.0865252
Tnpo3	2	1.41926	0.350135	0.2	0.064	3.15119e-06	0.088227
Tex30	2	1.57824	0.45631	0.589	0.348	3.47538e-06	0.0973038
Cmbl	2	0.526941	-0.640666	0.011	0.206	3.48255e-06	0.0975044
Npr1	2	1.62797	0.487332	0.368	0.171	3.49848e-06	0.0979506
Wbp1l	2	1.39827	0.335237	0.242	0.085	3.5053e-06	0.0981414
Bod1l	2	1.53317	0.427336	0.347	0.154	3.51644e-06	0.0984532
Tnp2	2	0.611504	-0.491833	1	0.956	3.63851e-06	0.101871
Taf4b	2	1.33915	0.292035	0.137	0.033	3.68829e-06	0.103265
Pfkfb4	2	1.35542	0.304111	0.116	0.025	3.76615e-06	0.105445
Tmx4	2	1.52889	0.424545	0.295	0.12	3.78709e-06	0.106031
Ncoa2	2	1.47327	0.387485	0.432	0.214	4.01767e-06	0.112487
H2-DMa	2	0.526031	-0.642395	0.032	0.24	4.08078e-06	0.114254
St8sia2	2	1.49183	0.400005	0.305	0.124	4.26048e-06	0.119285
Rpl26	2	0.662914	-0.41111	0.8	0.836	4.57995e-06	0.128229
Usp7	2	1.42077	0.351198	0.221	0.075	4.72782e-06	0.13237
Atp5j	2	0.659901	-0.415665	0.568	0.731	4.93339e-06	0.138125
Slc39a6	2	1.63211	0.489872	0.389	0.186	5.52381e-06	0.154656
Alg1	2	1.35372	0.302856	0.221	0.075	5.56225e-06	0.155732
Pdia6	2	1.50193	0.406754	0.684	0.43	5.73974e-06	0.160701
Rab13	2	0.481591	-0.73066	0.105	0.321	5.8144e-06	0.162792
Rabac1	2	0.654442	-0.423972	0.684	0.778	5.87393e-06	0.164458
Prm1	2	0.643562	-0.440737	1	1	5.93927e-06	0.166288
Anapc5	2	1.5221	0.420092	0.621	0.377	5.94878e-06	0.166554
Fkbp5	2	1.38334	0.3245	0.189	0.06	6.37498e-06	0.178487
Akr1c13	2	0.510906	-0.671569	0.021	0.211	6.80811e-06	0.190614
Ucp2	2	0.576106	-0.551464	0.295	0.501	6.81004e-06	0.190667
Atp2b4	2	1.40596	0.340724	0.232	0.083	6.89684e-06	0.193098
Ccdc28a	2	1.38648	0.326769	0.337	0.147	6.94948e-06	0.194572
Cd59a	2	0.536881	-0.621979	0.116	0.345	7.14893e-06	0.200156
Tmed9	2	1.54022	0.431928	0.621	0.423	7.4915e-06	0.209747
Mpzl1	2	1.56801	0.44981	0.568	0.338	7.5646e-06	0.211794
Rpl23	2	0.722877	-0.324516	0.916	0.944	7.84013e-06	0.219508
2410002F23Rik	2	1.62424	0.485037	0.474	0.262	8.45002e-06	0.236584
Helz	2	1.43283	0.359651	0.411	0.198	8.56603e-06	0.239832
Rbbp7	2	1.64032	0.494889	0.558	0.336	8.67536e-06	0.242893
Tapbp	2	1.58192	0.458639	0.716	0.454	8.91199e-06	0.249518
Ccdc107	2	0.503508	-0.686155	0.095	0.304	9.00648e-06	0.252164
Dnajb11	2	1.39896	0.335727	0.474	0.246	9.01408e-06	0.252376
Bop1	2	1.46968	0.385048	0.295	0.123	9.01443e-06	0.252386
Sema6c	2	1.5726	0.452732	0.442	0.233	9.0989e-06	0.254751
Wfdc6a	2	1.55276	0.440035	0.632	0.412	9.6873e-06	0.271225
Stt3a	2	1.3368	0.290277	0.358	0.154	9.87518e-06	0.276485
Rhob	2	1.42947	0.357305	0.379	0.175	1.02166e-05	0.286045
Lmo2	2	1.35557	0.304225	0.211	0.071	1.02751e-05	0.287683
Nsmce4a	2	0.524737	-0.644858	0.095	0.308	1.14127e-05	0.319534
Sfxn1	2	0.530521	-0.633896	0.042	0.235	1.18593e-05	0.332038
Myo7a	2	1.41323	0.345875	0.347	0.16	1.23889e-05	0.346864
Slc27a3	2	1.34319	0.295051	0.337	0.149	1.24631e-05	0.348942
Wnk3	2	1.4074	0.341742	0.305	0.131	1.26163e-05	0.353232
Cgrrf1	2	1.41495	0.347096	0.242	0.091	1.26269e-05	0.353529
Pspc1	2	1.4838	0.394605	0.242	0.094	1.26334e-05	0.35371
Ssbp4	2	1.46993	0.385217	0.326	0.149	1.27938e-05	0.358201
Retsat	2	1.38574	0.326237	0.232	0.083	1.31411e-05	0.367924
Hk2	2	1.47653	0.389693	0.368	0.177	1.31538e-05	0.36828
Capn10	2	1.40125	0.337367	0.284	0.116	1.35511e-05	0.379404
Plp1	2	0.553701	-0.59113	0.063	0.27	1.35666e-05	0.379838
Glmp	2	1.53476	0.428371	0.389	0.194	1.50699e-05	0.421928
Pdzd11	2	1.47416	0.38809	0.463	0.246	1.53738e-05	0.430437
Olfml2b	2	1.58774	0.462313	0.232	0.089	1.54121e-05	0.431509
Ccdc25	2	1.47186	0.386528	0.463	0.255	1.58603e-05	0.444057
Gnl3	2	1.44973	0.371378	0.221	0.082	1.58609e-05	0.444074
Gatsl3	2	0.566889	-0.567591	0.021	0.205	1.62114e-05	0.453886
Akr1a1	2	1.41339	0.345991	0.789	0.58	1.69859e-05	0.47557
Sec61a1	2	1.41316	0.345826	0.326	0.146	1.71651e-05	0.480587
Nt5c	2	0.558302	-0.582855	0.347	0.508	1.81094e-05	0.507028
Rpl27	2	0.641385	-0.444125	0.611	0.729	1.83079e-05	0.512585
Znfx1	2	1.37341	0.317296	0.2	0.068	1.8336e-05	0.513372
Mum1l1	2	1.51172	0.413245	0.516	0.3	1.83771e-05	0.514523
3110043O21Rik	2	1.34987	0.300006	0.116	0.027	1.87336e-05	0.524504
Dnm3	2	1.2911	0.255493	0.211	0.074	1.95399e-05	0.547077
Scara5	2	1.36464	0.310889	0.316	0.138	2.04549e-05	0.572695
Mrpl3	2	1.38065	0.322557	0.4	0.198	2.08376e-05	0.583411
Laptm4a	2	1.42863	0.356718	0.842	0.615	2.10207e-05	0.588539
Ube2s	2	0.659772	-0.415861	0.6	0.714	2.19348e-05	0.61413
Ranbp1	2	1.512	0.413432	0.684	0.468	2.27482e-05	0.636903
Rap1a	2	0.566514	-0.568253	0.189	0.401	2.27698e-05	0.637508
Scrib	2	1.35042	0.300418	0.274	0.112	2.34108e-05	0.655455
Echs1	2	0.589756	-0.528046	0.295	0.501	2.35858e-05	0.660355
Zdhhc6	2	1.32451	0.28104	0.189	0.064	2.36622e-05	0.662496
Gm5900	2	1.31019	0.27017	0.232	0.087	2.38097e-05	0.666624
Hebp1	2	0.572656	-0.557469	0.032	0.21	2.41116e-05	0.675076
Actg1	2	1.32617	0.282293	1	0.91	2.44516e-05	0.684596
Clic6	2	1.3133	0.272542	0.147	0.042	2.48452e-05	0.695615
Rpl37	2	0.697854	-0.359745	0.747	0.859	2.57271e-05	0.720309
Igsf8	2	1.5302	0.425398	0.621	0.415	2.64777e-05	0.741322
Laptm4b	2	1.30067	0.26288	0.905	0.709	2.70853e-05	0.758334
Dstn	2	0.63512	-0.453941	0.474	0.647	2.7127e-05	0.759502
Bex4	2	0.677606	-0.389189	0.853	0.836	2.72555e-05	0.763099
Clcn5	2	1.42491	0.354111	0.147	0.044	2.74157e-05	0.767584
Tpi1	2	0.565372	-0.570271	0.295	0.471	2.81381e-05	0.787811
Rpl34	2	0.690519	-0.370312	0.716	0.791	2.87035e-05	0.80364
Lasp1	2	0.577482	-0.549078	0.063	0.25	2.9826e-05	0.835068
Mgst3	2	1.66762	0.511396	0.495	0.303	2.98376e-05	0.835394
Inpp5b	2	1.51358	0.414475	0.274	0.121	2.9848e-05	0.835684
Cpped1	2	1.36277	0.309522	0.179	0.06	3.00471e-05	0.841259
Gja1	2	1.43185	0.358968	0.537	0.314	3.01565e-05	0.844322
Rps13	2	0.676122	-0.391382	0.684	0.795	3.10789e-05	0.870146
Thra	2	1.31953	0.277275	0.116	0.029	3.23946e-05	0.906984
Pex11a	2	1.3812	0.322956	0.263	0.108	3.31821e-05	0.929033
Abcc1	2	1.37685	0.319797	0.253	0.104	3.43288e-05	0.961137
Ssr1	2	1.37017	0.314937	0.537	0.31	3.51481e-05	0.984076
Hsd17b10	2	0.557391	-0.584488	0.095	0.282	3.61234e-05	1
Pfkl	2	0.533088	-0.629069	0.095	0.285	3.6693e-05	1
Acbd5	2	1.50904	0.411474	0.305	0.143	3.77035e-05	1
1600012H06Rik	2	1.32345	0.28024	0.253	0.102	3.77439e-05	1
Prdx4	2	1.39015	0.329411	0.695	0.445	3.79885e-05	1
Porcn	2	1.30997	0.270001	0.211	0.078	3.81622e-05	1
Ckap2l	2	1.29401	0.257749	0.147	0.044	3.89644e-05	1
Rps11	2	0.720088	-0.328382	0.916	0.895	3.99297e-05	1
Rilpl2	2	0.558136	-0.583153	0.116	0.31	4.00064e-05	1
Mtap7d3	2	0.551463	-0.59518	0.011	0.172	4.11445e-05	1
Lamtor3	2	1.3259	0.282091	0.242	0.095	4.27125e-05	1
Vdac1	2	0.580522	-0.543827	0.316	0.499	4.38519e-05	1
Gnb2	2	0.643792	-0.44038	0.579	0.659	4.49336e-05	1
Cox6c	2	0.716511	-0.333361	0.863	0.909	4.50071e-05	1
Taldo1	2	0.573834	-0.555415	0.284	0.457	4.61171e-05	1
Lrrc8c	2	1.34872	0.299158	0.168	0.056	4.67919e-05	1
Slc25a14	2	1.41979	0.350507	0.284	0.127	4.71886e-05	1
Ndufa10	2	1.53469	0.42833	0.621	0.389	4.77592e-05	1
Dolk	2	1.31764	0.275843	0.179	0.061	5.04662e-05	1
Nt5c3b	2	0.568309	-0.565089	0.295	0.469	5.05301e-05	1
BC003965	2	1.51531	0.41562	0.326	0.16	5.21865e-05	1
Ctnnal1	2	1.38298	0.32424	0.284	0.127	5.40281e-05	1
Cdc5l	2	1.38466	0.325457	0.295	0.132	5.4163e-05	1
Slc38a10	2	1.40444	0.339637	0.211	0.08	5.46702e-05	1
Klhl23	2	1.4699	0.385197	0.474	0.278	5.56888e-05	1
Nfkbia	2	1.5213	0.419567	0.558	0.355	5.76131e-05	1
Cdh2	2	1.39225	0.330923	0.337	0.157	5.79962e-05	1
Pfn1	2	0.677485	-0.389368	0.568	0.707	5.93922e-05	1
Rnf115	2	1.38533	0.325935	0.232	0.093	6.01919e-05	1
Tmem51	2	0.578092	-0.548023	0.042	0.207	6.06658e-05	1
Cisd1	2	0.534733	-0.625987	0.189	0.366	6.11287e-05	1
Slc30a2	2	1.41137	0.344562	0.474	0.274	6.28179e-05	1
Bcl7c	2	1.50376	0.40797	0.253	0.109	6.40923e-05	1
Fbxl6	2	1.34299	0.294896	0.242	0.101	6.4348e-05	1
Sf3a3	2	1.3299	0.285105	0.253	0.105	6.44311e-05	1
Kansl3	2	1.57425	0.453777	0.4	0.229	6.61179e-05	1
Pum3	2	1.32009	0.277699	0.189	0.068	6.87201e-05	1
Scarb1	2	0.556721	-0.585691	0.189	0.381	6.90308e-05	1
Morf4l2	2	1.40997	0.343566	0.653	0.432	6.91594e-05	1
Ggh	2	1.46131	0.379333	0.295	0.139	6.98363e-05	1
Aldh2	2	1.36872	0.313878	0.842	0.6	7.25677e-05	1
Hpse	2	0.592818	-0.522868	0.011	0.162	7.34354e-05	1
Tmpo	2	1.29001	0.254651	0.232	0.093	7.37171e-05	1
Atp5j2	2	0.656908	-0.420211	0.589	0.696	7.44167e-05	1
Cdk5	2	0.610402	-0.493638	0.379	0.536	7.64291e-05	1
Rbbp4	2	1.44509	0.368173	0.611	0.401	7.68021e-05	1
Kcnk13	2	1.28905	0.253905	0.137	0.041	8.05934e-05	1
Cd151	2	1.34231	0.294395	0.705	0.479	8.24924e-05	1
Rab4a	2	0.566154	-0.568889	0.126	0.306	8.34702e-05	1
Commd8	2	1.39612	0.333698	0.253	0.106	8.50475e-05	1
Erf	2	1.30197	0.263876	0.147	0.046	8.63474e-05	1
Psmb7	2	0.655899	-0.421749	0.484	0.63	8.6576e-05	1
Hacd3	2	1.45382	0.374193	0.284	0.132	8.7401e-05	1
Phf8	2	1.28765	0.252821	0.189	0.07	8.78772e-05	1
Tox2	2	0.610673	-0.493194	0.011	0.162	9.09731e-05	1
Ndufa3	2	0.700694	-0.355684	0.653	0.757	9.2665e-05	1
Casp6	2	0.563185	-0.574147	0.095	0.27	9.54647e-05	1
Tmem147	2	0.593534	-0.521661	0.358	0.544	9.63351e-05	1
Gclm	2	1.30775	0.268309	0.2	0.076	0.000103613	1
Aifm1	2	1.38466	0.325452	0.189	0.071	0.000104222	1
Serpinb6a	2	1.51354	0.414451	0.495	0.306	0.000106351	1
Cmas	2	0.619508	-0.47883	0.368	0.533	0.000108439	1
Rmnd5b	2	1.40296	0.338587	0.389	0.206	0.000109001	1
Ubl3	2	1.50333	0.407682	0.421	0.239	0.00011033	1
H13	2	1.40793	0.342121	0.389	0.207	0.000110393	1
Eif4g1	2	1.40291	0.338549	0.358	0.186	0.000112737	1
Tmem123	2	1.31957	0.277303	0.2	0.078	0.000117413	1
Slc25a5	2	1.36584	0.311769	0.884	0.718	0.000119309	1
Sod2	2	0.581204	-0.542654	0.274	0.435	0.00012233	1
Prss35	2	1.29254	0.256609	0.105	0.027	0.000123819	1
Emb	2	0.508104	-0.677068	0.189	0.362	0.000126011	1
Hspa8	2	1.31093	0.270738	0.926	0.715	0.000133763	1
Rplp1	2	0.775961	-0.253654	0.968	0.967	0.000138806	1
App	2	1.537	0.429831	0.474	0.303	0.000139054	1
Itm2c	2	1.34673	0.29768	0.832	0.662	0.000139221	1
Gm10605	2	1.32986	0.285077	0.221	0.091	0.000139298	1
Zfp148	2	1.46772	0.38371	0.189	0.075	0.000140892	1
Tspan5	2	1.52747	0.423614	0.389	0.214	0.000142601	1
Spock2	2	1.50121	0.406272	0.421	0.237	0.000146965	1
Rnf34	2	1.49383	0.401343	0.453	0.276	0.000147311	1
Rpl36al	2	0.67317	-0.395757	0.653	0.726	0.000148924	1
Agpat4	2	1.35589	0.304456	0.653	0.424	0.000157197	1
Gna12	2	0.649016	-0.432298	0.011	0.153	0.000159901	1
Surf2	2	1.29555	0.258934	0.189	0.072	0.000161062	1
Rbp1	2	0.538058	-0.619789	0.021	0.166	0.000162046	1
Tfe3	2	1.43458	0.360872	0.2	0.082	0.000164467	1
Mkrn1	2	0.691181	-0.369354	0.474	0.603	0.000170111	1
Rnaset2b	2	0.606824	-0.499517	0.042	0.198	0.000170908	1
Mafb	2	1.31108	0.270854	0.232	0.098	0.0001767	1
Alas2	2	0.567062	-0.567287	0.147	0.33	0.000180195	1
Rpl37a	2	0.736362	-0.306034	0.821	0.906	0.000184652	1
Rap2b	2	1.33108	0.285994	0.211	0.087	0.000186197	1
Rps27l	2	0.680154	-0.385436	0.568	0.69	0.000187692	1
Cd302	2	0.630259	-0.461624	0.453	0.574	0.000189969	1
Gm15543	2	0.579475	-0.545632	0.189	0.371	0.000195252	1
Hist1h2bc	2	1.41944	0.350259	0.6	0.398	0.000196183	1
Clstn1	2	1.44935	0.371114	0.337	0.176	0.000197483	1
Rps27a	2	0.749525	-0.288315	0.863	0.918	0.000209096	1
Mier3	2	1.40728	0.341661	0.253	0.117	0.000209417	1
Mcee	2	1.57735	0.455748	0.379	0.222	0.000212073	1
Sdf4	2	1.29782	0.260687	0.737	0.538	0.000214336	1
Pisd	2	1.29404	0.25777	0.2	0.08	0.000217996	1
Smarca4	2	1.43451	0.360824	0.263	0.121	0.000220126	1
Ppt2	2	1.36615	0.311995	0.368	0.196	0.000222843	1
Med16	2	1.28419	0.250125	0.147	0.05	0.000231548	1
Zeb2	2	1.33694	0.290381	0.158	0.057	0.000231825	1
Klc2	2	1.35309	0.30239	0.432	0.236	0.000231864	1
Wfdc6b	2	1.28747	0.252678	0.274	0.126	0.000234146	1
Cks2	2	0.596856	-0.516079	0.358	0.498	0.000253125	1
Sf3b1	2	1.31	0.270026	0.326	0.165	0.000255015	1
Agpat5	2	0.564315	-0.572143	0.095	0.255	0.000257706	1
Cd99l2	2	1.30294	0.264622	0.211	0.087	0.000258247	1
Txndc5	2	0.609131	-0.495721	0.211	0.379	0.000258276	1
Ptpn1	2	1.38083	0.322684	0.295	0.146	0.000258468	1
Gas2l1	2	1.36543	0.311471	0.653	0.447	0.000262677	1
Canx	2	1.37014	0.314915	0.463	0.28	0.000264388	1
Cyb5r1	2	1.38636	0.326679	0.547	0.364	0.000268062	1
Enpp5	2	1.43335	0.360015	0.368	0.203	0.000272909	1
Polr2e	2	1.3229	0.279823	0.474	0.27	0.000276787	1
Btf3	2	0.718922	-0.330002	0.779	0.804	0.000283501	1
RP23-198F11.3	2	0.627118	-0.46662	0.011	0.142	0.000294789	1
Mrps17	2	0.604837	-0.502796	0.4	0.536	0.000300119	1
Rap1b	2	0.594402	-0.520199	0.305	0.449	0.000311755	1
Nudt9	2	1.5189	0.417989	0.453	0.292	0.00031479	1
Rpl32	2	0.759684	-0.274852	0.874	0.877	0.000316846	1
Ivns1abp	2	1.35357	0.302747	0.337	0.177	0.000319199	1
Tmem50a	2	1.36147	0.308563	0.568	0.382	0.000330717	1
Mro	2	0.596988	-0.515858	0.316	0.443	0.000342568	1
Zc3h7b	2	1.42294	0.352725	0.347	0.19	0.000345462	1
Usp9x	2	1.47488	0.388576	0.337	0.173	0.000346785	1
Ngfrap1	2	1.33498	0.288913	0.516	0.314	0.000349199	1
Nf2	2	1.39653	0.333988	0.242	0.113	0.000356393	1
Cct3	2	1.42347	0.353096	0.547	0.353	0.00035713	1
Vdac2	2	0.702758	-0.352743	0.516	0.64	0.000359796	1
Ninj1	2	1.32156	0.278814	0.558	0.359	0.000368983	1
Anp32b	2	1.30585	0.266852	0.368	0.195	0.000370013	1
Lgmn	2	0.497499	-0.698162	0.442	0.551	0.000374545	1
Pgp	2	0.740346	-0.300638	0.674	0.794	0.000375163	1
Psmb6	2	0.672716	-0.396432	0.526	0.653	0.000376256	1
Fstl3	2	0.670924	-0.399099	0.063	0.218	0.000377585	1
Tepp	2	0.649843	-0.431025	0.011	0.138	0.00040077	1
Galk2	2	1.32274	0.279706	0.137	0.048	0.000404522	1
Pigk	2	1.40589	0.340668	0.358	0.192	0.000411969	1
Slc3a2	2	1.35288	0.302236	0.705	0.492	0.000413963	1
Ttyh2	2	0.61224	-0.490631	0.063	0.216	0.000420168	1
Phax	2	1.39228	0.33094	0.337	0.179	0.000425424	1
Comt	2	0.626725	-0.467247	0.084	0.241	0.000432041	1
Rad21	2	1.286	0.251535	0.358	0.187	0.000444824	1
S100a13	2	1.38396	0.324951	0.147	0.055	0.000454143	1
Hist1h1c	2	1.29284	0.256841	0.211	0.091	0.000455821	1
Fbln1	2	0.587104	-0.532553	0.042	0.18	0.000456989	1
Tbrg1	2	0.656129	-0.421398	0.242	0.423	0.000457052	1
Ncstn	2	1.38684	0.327025	0.326	0.169	0.000462471	1
Birc5	2	1.28775	0.252894	0.137	0.048	0.000467287	1
Nampt	2	1.34583	0.297007	0.274	0.134	0.000477422	1
2010107G23Rik	2	0.633613	-0.456317	0.063	0.211	0.000483787	1
Fbxo34	2	1.35634	0.304786	0.274	0.138	0.000496005	1
Slc2a3	2	1.32137	0.27867	0.347	0.187	0.000498497	1
Cryz	2	0.628186	-0.46492	0.053	0.195	0.00050774	1
Haus7	2	0.637213	-0.450651	0.221	0.393	0.000509888	1
Rassf2	2	1.31237	0.271833	0.232	0.108	0.00051697	1
Tex264	2	1.32439	0.280951	0.284	0.142	0.000523287	1
Fam60a	2	0.650209	-0.430461	0.021	0.15	0.000524646	1
Chpt1	2	0.635424	-0.453463	0.042	0.179	0.000525032	1
Psmg3	2	1.40711	0.341541	0.253	0.126	0.000531959	1
Rdx	2	1.47152	0.386299	0.474	0.306	0.000537133	1
Slc35f2	2	0.625989	-0.468422	0.011	0.131	0.000540382	1
Manf	2	0.758536	-0.276365	0.874	0.903	0.000541583	1
Il10rb	2	1.51635	0.416305	0.284	0.15	0.000542976	1
Mlec	2	1.30779	0.268341	0.463	0.274	0.000546105	1
Rps24	2	0.75926	-0.275411	0.768	0.855	0.000548322	1
Ganab	2	1.45148	0.372581	0.189	0.082	0.000549921	1
Ppp1ca	2	0.624199	-0.471287	0.379	0.479	0.000557414	1
Sncb	2	0.691713	-0.368584	0	0.113	0.000563189	1
Cpq	2	1.30654	0.267384	0.379	0.209	0.000569568	1
Rora	2	0.680961	-0.38425	0.021	0.149	0.000591624	1
Tbcb	2	1.31681	0.27521	0.737	0.574	0.000620096	1
Exosc5	2	1.30831	0.268739	0.821	0.596	0.00062214	1
Helt	2	0.664308	-0.409009	0.011	0.13	0.000624506	1
Ddx3x	2	1.31013	0.27013	0.295	0.153	0.000629744	1
Scd2	2	1.34769	0.298389	0.6	0.397	0.000665195	1
Dact2	2	0.681586	-0.383333	0	0.111	0.000667266	1
Srp54b	2	1.33801	0.29118	0.442	0.265	0.00067199	1
Calm3	2	1.36925	0.314264	0.726	0.578	0.000674547	1
Gca	2	0.622914	-0.473347	0.095	0.241	0.000688956	1
Tulp2	2	0.609627	-0.494908	0.158	0.314	0.000699408	1
Serf2	2	0.754536	-0.281652	0.884	0.894	0.000699752	1
Rps6ka3	2	1.29082	0.255277	0.105	0.033	0.000711799	1
Slc47a2	2	1.37984	0.321968	0.421	0.252	0.000715477	1
Nfx1	2	1.46826	0.38408	0.242	0.117	0.000746164	1
Nacc2	2	0.681517	-0.383434	0.021	0.145	0.000756246	1
Gsta3	2	0.651981	-0.427741	0.032	0.164	0.000759221	1
Fam210b	2	1.32733	0.283168	0.295	0.157	0.000761556	1
Gnas	2	0.710064	-0.3424	0.737	0.749	0.000769152	1
Appl2	2	1.45926	0.377929	0.347	0.21	0.00078838	1
Tuba4a	2	1.32312	0.279993	0.137	0.05	0.000796629	1
Atp6ap1	2	1.29893	0.261542	0.305	0.158	0.000803732	1
Eef2	2	1.29079	0.255255	0.842	0.692	0.00080871	1
Anxa2	2	1.40846	0.342497	0.705	0.521	0.000831356	1
Kitl	2	1.28431	0.250219	0.2	0.087	0.000850265	1
Tmem115	2	1.369	0.31408	0.221	0.106	0.000852341	1
Cnpy3	2	1.3245	0.281036	0.295	0.154	0.000863599	1
Rpl3	2	0.727697	-0.317871	0.695	0.756	0.000866465	1
Rab31	2	1.3927	0.331243	0.389	0.237	0.000866837	1
Tmem180	2	0.620686	-0.476931	0.116	0.261	0.000892928	1
Uqcr11	2	0.728833	-0.31631	0.758	0.794	0.000903769	1
Plk2	2	0.684185	-0.379527	0	0.105	0.000935206	1
Atp5g1	2	0.744088	-0.295596	0.737	0.791	0.000959589	1
Snf8	2	0.644229	-0.4397	0.337	0.469	0.000962733	1
Pdia4	2	1.30724	0.267915	0.453	0.281	0.00101436	1
Ldha	2	0.630254	-0.461633	0.326	0.458	0.00102228	1
Acaa2	2	0.637713	-0.449867	0.137	0.288	0.0010299	1
Gfm1	2	1.29773	0.260619	0.126	0.045	0.00103082	1
Dnajc7	2	0.654463	-0.42394	0.242	0.4	0.00103676	1
H2-D1	2	1.35497	0.303776	0.421	0.256	0.00103977	1
E330017L17Rik	2	0.705314	-0.349112	0.011	0.124	0.00105358	1
Glo1	2	1.36568	0.311652	0.537	0.383	0.00106708	1
Twf2	2	0.63568	-0.45306	0.126	0.273	0.00107156	1
Parp1	2	1.39922	0.335916	0.358	0.207	0.00107283	1
Prkra	2	0.649999	-0.430784	0.316	0.453	0.0010774	1
Stbd1	2	0.708355	-0.34481	0	0.102	0.00110632	1
Gja6	2	0.621609	-0.475444	0.095	0.239	0.00110659	1
Tacc1	2	1.3114	0.271097	0.484	0.297	0.00110729	1
Ralbp1	2	1.32636	0.282438	0.347	0.198	0.00110866	1
Golgb1	2	1.3008	0.262976	0.168	0.07	0.00111176	1
2020-03-02	2	0.618659	-0.480201	0.158	0.306	0.00111712	1
Cited4	2	0.608198	-0.497255	0.147	0.292	0.00112388	1
Tbca	2	0.746312	-0.292612	0.6	0.7	0.00116464	1
Tsg101	2	0.647925	-0.43398	0.105	0.244	0.00120794	1
Daam2	2	1.31331	0.27255	0.337	0.19	0.00122964	1
4930455G09Rik	2	0.706464	-0.347483	0.032	0.158	0.00126683	1
Cdk1	2	0.675736	-0.391953	0.137	0.289	0.00127392	1
Exoc3l2	2	1.41595	0.347802	0.379	0.233	0.00131285	1
Slc11a2	2	1.34519	0.296535	0.253	0.128	0.00135959	1
Folr1	2	0.622304	-0.474326	0.389	0.51	0.00139425	1
Eif3j1	2	1.33248	0.287042	0.263	0.139	0.00141798	1
Atp5g3	2	0.635091	-0.453987	0.316	0.443	0.00147434	1
Nfe2l1	2	1.29411	0.257825	0.305	0.165	0.00147905	1
Nid1	2	1.40634	0.340993	0.211	0.102	0.00149225	1
Med31	2	0.642603	-0.442228	0.221	0.367	0.00155665	1
Mpc1	2	0.663343	-0.410463	0.116	0.262	0.00156247	1
Ubl5	2	0.755851	-0.279911	0.684	0.78	0.00156704	1
Zfand5	2	1.28865	0.253599	0.368	0.213	0.00159146	1
Tcf25	2	1.29077	0.255242	0.505	0.33	0.00159866	1
Snx5	2	1.33421	0.288337	0.274	0.149	0.00162431	1
Oaz2	2	0.671775	-0.397831	0.358	0.49	0.00170702	1
Nop56	2	1.33021	0.285335	0.221	0.112	0.0017904	1
Mtcl1	2	1.33086	0.285822	0.158	0.067	0.00179506	1
Aars	2	1.50251	0.407138	0.232	0.121	0.00180765	1
N6amt2	2	0.747044	-0.291631	0.063	0.199	0.00183592	1
Vasn	2	1.33677	0.29026	0.295	0.164	0.00184042	1
Elp5	2	0.64401	-0.440042	0.284	0.417	0.0018652	1
Tarsl2	2	0.733994	-0.309254	0.011	0.112	0.00196613	1
Srsf9	2	1.29409	0.257804	0.484	0.302	0.00198126	1
G3bp1	2	1.32404	0.280685	0.337	0.198	0.00206834	1
Rps15a	2	0.769106	-0.262527	0.821	0.862	0.0020895	1
Parl	2	0.671542	-0.398178	0.116	0.255	0.00213051	1
Fbxo31	2	1.28942	0.254195	0.126	0.049	0.00213707	1
Aldoa	2	1.31293	0.272259	0.768	0.677	0.00217444	1
Tbata	2	0.710178	-0.342239	0.032	0.147	0.00218447	1
Slc26a2	2	1.30392	0.265378	0.137	0.055	0.00220909	1
Gtf2b	2	1.31054	0.270438	0.411	0.255	0.00220996	1
Trmt112	2	1.30241	0.264218	0.337	0.198	0.00224494	1
Fbrsl1	2	1.32818	0.283813	0.274	0.151	0.00226459	1
Atp1a2	2	1.45579	0.375552	0.411	0.267	0.00229449	1
Sdc2	2	0.671681	-0.397971	0.074	0.205	0.00231089	1
Chchd7	2	1.38371	0.324769	0.442	0.288	0.00235587	1
Cdc42ep5	2	0.665363	-0.407422	0.263	0.412	0.00236566	1
Rpl30	2	0.738523	-0.303103	0.663	0.711	0.00237597	1
Rnf10	2	0.674631	-0.393589	0.274	0.411	0.00245231	1
Tdrp	2	0.656528	-0.420791	0.4	0.501	0.00255831	1
B4galnt1	2	1.3232	0.280056	0.358	0.22	0.00255904	1
Chic2	2	0.684508	-0.379054	0.242	0.386	0.00256858	1
Tmem14c	2	0.680512	-0.38491	0.421	0.512	0.00257159	1
Tm2d1	2	1.31802	0.276129	0.316	0.181	0.00261349	1
Stxbp2	2	0.666871	-0.405159	0.042	0.154	0.00261599	1
Dohh	2	0.65682	-0.420345	0.189	0.33	0.0026618	1
Znrf1	2	1.31328	0.272527	0.147	0.063	0.00268145	1
Gramd1a	2	1.33519	0.289071	0.263	0.143	0.00271496	1
Rras2	2	0.667574	-0.404104	0.189	0.325	0.00274799	1
Gpi1	2	0.651294	-0.428794	0.105	0.232	0.00277018	1
Gbas	2	0.646348	-0.436417	0.158	0.289	0.00279891	1
Ppfibp2	2	0.657801	-0.418853	0.042	0.153	0.00281725	1
Gna14	2	0.728741	-0.316436	0.032	0.142	0.00285097	1
St5	2	1.31939	0.277169	0.189	0.089	0.0028555	1
Pdk1	2	0.678033	-0.38856	0.053	0.168	0.0029365	1
Enho	2	0.70007	-0.356575	0.021	0.121	0.00300984	1
Acsl4	2	0.697562	-0.360164	0.021	0.121	0.00305119	1
Mgat5	2	1.28982	0.254502	0.2	0.098	0.00308045	1
Nhsl1	2	1.29954	0.262009	0.126	0.05	0.00308714	1
Nqo2	2	0.722628	-0.32486	0.032	0.138	0.00312219	1
Ufc1	2	0.673146	-0.395792	0.263	0.402	0.00316265	1
Slc44a2	2	1.29957	0.26203	0.358	0.211	0.00331944	1
Gart	2	1.32609	0.282236	0.305	0.175	0.00332396	1
1110065P20Rik	2	0.652848	-0.426411	0.368	0.469	0.00333201	1
Bri3bp	2	1.30381	0.265292	0.116	0.045	0.00341576	1
Mlf2	2	1.34673	0.297681	0.337	0.207	0.00343261	1
Hmgb1	2	1.39845	0.335364	0.705	0.628	0.00350421	1
Pttg1	2	0.627174	-0.466532	0.105	0.225	0.00356119	1
Med29	2	0.696407	-0.361821	0.389	0.51	0.00358882	1
Ankrd39	2	0.704015	-0.350956	0.042	0.153	0.00358884	1
Kctd13	2	0.678434	-0.387968	0.358	0.462	0.0036142	1
Ppdpf	2	0.686679	-0.375888	0.116	0.248	0.0037179	1
Syce3	2	0.702797	-0.352686	0.084	0.213	0.00375796	1
Ostc	2	0.671462	-0.398297	0.284	0.404	0.00387118	1
Spata33	2	0.70467	-0.350026	0.653	0.677	0.00387986	1
Cox5b	2	0.753156	-0.283483	0.695	0.724	0.003892	1
Trappc6a	2	1.28464	0.250482	0.4	0.247	0.00390713	1
Mpdu1	2	0.664364	-0.408926	0.2	0.322	0.00392787	1
Dtd2	2	0.67568	-0.392036	0.295	0.407	0.00394477	1
G3bp2	2	0.697729	-0.359924	0.347	0.483	0.00397379	1
Slc25a39	2	0.695535	-0.363074	0.137	0.274	0.00400033	1
Ifngr2	2	1.35443	0.303379	0.579	0.424	0.00414394	1
Cox6b1	2	0.746365	-0.292541	0.642	0.688	0.00415993	1
Slc48a1	2	1.37587	0.319086	0.284	0.168	0.00416436	1
Mrps6	2	0.700268	-0.356292	0.579	0.606	0.00424541	1
Sat1	2	1.44806	0.370225	0.232	0.127	0.00435365	1
Ctso	2	1.3067	0.267508	0.295	0.169	0.00448224	1
Npl	2	1.32667	0.282672	0.411	0.267	0.00448333	1
Gpr55	2	0.700515	-0.35594	0.032	0.132	0.00455636	1
Fbxl19	2	1.29019	0.254792	0.221	0.117	0.00456382	1
Nde1	2	0.720501	-0.327808	0.021	0.115	0.00461778	1
Fam188a	2	1.3338	0.288034	0.2	0.104	0.00462285	1
Coprs	2	0.699108	-0.357951	0.032	0.13	0.00469136	1
Rnf20	2	1.29164	0.255909	0.189	0.097	0.00472439	1
Anp32a	2	0.656213	-0.421269	0.147	0.269	0.00483073	1
Tjp1	2	0.723755	-0.323303	0.021	0.113	0.00493163	1
Gabarapl2	2	0.722277	-0.325346	0.526	0.604	0.00498052	1
Klhl36	2	0.719237	-0.329564	0.074	0.194	0.0050033	1
Fam49b	2	1.28862	0.25357	0.379	0.235	0.00500884	1
Ywhah	2	0.729951	-0.314778	0.589	0.615	0.00508927	1
Nfatc2ip	2	1.28977	0.254461	0.474	0.312	0.00514391	1
Nucb2	2	1.3067	0.267505	0.232	0.127	0.00524767	1
Trpc5os	2	1.29324	0.257148	0.253	0.141	0.00524783	1
Pfdn5	2	0.767894	-0.264103	0.832	0.851	0.00534039	1
Snap47	2	0.70554	-0.348792	0.137	0.262	0.00575332	1
Wsb2	2	1.32333	0.280148	0.284	0.169	0.00595773	1
Srp9	2	0.746928	-0.291786	0.463	0.561	0.00608955	1
2020-09-10	2	0.701285	-0.354841	0.042	0.142	0.00610747	1
Rps4x	2	0.685556	-0.377525	0.389	0.49	0.00610798	1
Tpd52l1	2	0.716159	-0.333853	0.442	0.565	0.00611454	1
Gas7	2	1.31889	0.27679	0.358	0.224	0.00615287	1
Hsbp1	2	0.767202	-0.265005	0.653	0.698	0.00619425	1
Arpc4	2	0.703374	-0.351866	0.516	0.553	0.00619844	1
Cytip	2	0.718292	-0.330879	0.053	0.157	0.00628814	1
Psmd9	2	1.34146	0.293757	0.305	0.181	0.00645116	1
Mcfd2	2	0.672649	-0.396532	0.263	0.379	0.00648768	1
Racgap1	2	1.31299	0.272308	0.305	0.188	0.00663618	1
Prdx3	2	0.658478	-0.417825	0.326	0.428	0.00673207	1
Nup62cl	2	0.701278	-0.354851	0.137	0.259	0.00682965	1
Ccdc53	2	0.646187	-0.436667	0.211	0.312	0.00687502	1
Abhd17a	2	0.695735	-0.362787	0.453	0.535	0.00692278	1
Ube2l6	2	0.722272	-0.325353	0.042	0.141	0.00696235	1
Hp1bp3	2	0.730582	-0.313913	0.116	0.237	0.00721349	1
Gmcl1	2	0.734705	-0.308286	0.032	0.124	0.00733735	1
Tmco2	2	0.63829	-0.448963	0.105	0.211	0.00739659	1
Fth1	2	0.751228	-0.286045	0.884	0.925	0.0074691	1
Swi5	2	0.756133	-0.279538	0.589	0.653	0.00751617	1
Cox17	2	0.730463	-0.314077	0.484	0.57	0.00768101	1
Nrbp1	2	0.747965	-0.290399	0.074	0.183	0.00778117	1
Rasd1	2	1.3485	0.298991	0.221	0.126	0.00781321	1
Gas6	2	0.632959	-0.457349	0.358	0.457	0.00783258	1
Psmc6	2	0.691151	-0.369396	0.084	0.191	0.0078647	1
Mpi	2	1.29571	0.259059	0.263	0.154	0.00793438	1
Serp1	2	0.677928	-0.388715	0.295	0.405	0.00794454	1
Agpat3	2	0.68883	-0.372761	0.084	0.194	0.00802793	1
Fzd9	2	0.720956	-0.327178	0.021	0.104	0.00828862	1
2020-09-07	2	0.666423	-0.405831	0.158	0.267	0.00831097	1
Spint3	2	1.29939	0.261896	0.168	0.085	0.00833273	1
Nrn1l	2	0.663502	-0.410223	0.042	0.135	0.00836272	1
Sgta	2	0.706953	-0.346791	0.116	0.229	0.00843488	1
Med9	2	0.767467	-0.264659	0.421	0.52	0.00850248	1
Spcs1	2	0.762231	-0.271505	0.642	0.673	0.00864912	1
Ifngr1	2	0.743697	-0.296122	0.095	0.207	0.00877419	1
Snx7	2	0.715865	-0.334264	0.147	0.266	0.00888019	1
Snrnp27	2	0.653926	-0.42476	0.116	0.222	0.0090379	1
Etv5	2	0.760476	-0.273811	0.042	0.136	0.00914452	1
Rpl22	2	0.75808	-0.276967	0.653	0.708	0.00914701	1
Vma21	2	0.69547	-0.363167	0.095	0.196	0.00925352	1
Mrpl57	2	0.716598	-0.333241	0.368	0.471	0.00932264	1
Ninl	2	0.726059	-0.320124	0.053	0.15	0.00951096	1
Ywhaq	2	0.763487	-0.269859	0.737	0.753	0.00965241	1
Mfsd11	2	1.29498	0.258497	0.2	0.109	0.00974497	1
Syap1	2	0.69127	-0.369224	0.305	0.405	0.00993222	1
Prps1	2	0.747773	-0.290656	0.074	0.177	0.00994963	1

## Sheet: scDEGs Neg
Gene	p-value	Average Log2 Fold Change	Percent Expresion Within Cluster	Percent Expression Outside Cluster	Adjusted p-value	Cluster Number	Fold Change
Myl6b	1.83319e-51	-2.73829	0.108	0.831	5.13258e-47	1	0.0646805
Gm14226	2.17312e-51	-2.66726	0.078	0.771	6.0843e-47	1	0.0694419
Serpina3a	2.40742e-51	-3.19319	0.125	0.855	6.74029e-47	1	0.0410407
Aqp8	6.90841e-49	-2.76405	0.137	0.88	1.93422e-44	1	0.0630361
Gsta2	2.08584e-48	-2.51915	0.051	0.687	5.83994e-44	1	0.0805281
Gm37350	3.93303e-40	-3.10794	0.178	0.819	1.10117e-35	1	0.0446927
Dhcr24	3.1649e-39	-1.67246	0.01	0.446	8.86109e-35	1	0.187785
Lgals1	2.74495e-30	3.69345	0.836	0.157	7.6853e-26	1	40.1834
Igfbp7	5.35755e-27	-1.98361	0.384	0.892	1.50001e-22	1	0.137572
Stmn1	1.46311e-25	-1.52584	0.567	0.952	4.09642e-21	1	0.217438
Prnp	4.37235e-25	-2.07311	0.105	0.554	1.22417e-20	1	0.125794
S100a1	7.28437e-25	-2.72702	0.073	0.482	2.03948e-20	1	0.0654141
Rhox5	2.9289e-24	-1.88989	0.333	0.807	8.20032e-20	1	0.151089
Cdc42ep4	7.65452e-22	-1.16631	0.022	0.325	2.14311e-17	1	0.311516
Yipf1	1.05329e-21	-1.40343	0.232	0.759	2.94899e-17	1	0.245754
Rhox8	1.88101e-21	-1.22334	0.883	0.988	5.26645e-17	1	0.294246
6030408B16Rik	1.14851e-20	-1.50045	0.095	0.506	3.21559e-16	1	0.22303
1700031F05Rik	1.37467e-20	-0.84874	0	0.205	3.8488e-16	1	0.427954
Slc26a10	1.52224e-20	-1.02753	0.02	0.301	4.26197e-16	1	0.357888
U90926	2.27725e-20	-1.09512	0.02	0.301	6.37585e-16	1	0.334499
Defb36	5.22645e-20	1.12983	0.985	0.892	1.4633e-15	1	3.09514
Uchl1	1.01993e-19	2.25943	0.692	0.12	2.8556e-15	1	9.57762
Gstm6	7.09871e-19	-1.26622	0.435	0.855	1.9875e-14	1	0.281894
Fkbp4	1.21095e-18	1.58727	0.829	0.494	3.39042e-14	1	4.89036
Chchd2	2.87559e-18	0.966582	0.988	1	8.05108e-14	1	2.62894
Ttc9b	7.03895e-18	-1.07941	0.005	0.205	1.97077e-13	1	0.339794
Ctsl	2.17562e-17	-1.43649	0.939	0.988	6.0913e-13	1	0.23776
Gpd1	2.37999e-17	-1.27237	0.076	0.422	6.6635e-13	1	0.280167
Acat1	2.88689e-17	-1.18769	0.12	0.506	8.08271e-13	1	0.304923
Serpina5	3.65793e-17	-1.50206	0.447	0.831	1.02415e-12	1	0.222671
Elovl2	6.35123e-17	-1.23696	0.174	0.602	1.77822e-12	1	0.290266
Fxyd6	9.90447e-17	1.81446	0.692	0.181	2.77305e-12	1	6.13777
Olfml3	1.14188e-16	-1.29392	0.073	0.41	3.19704e-12	1	0.274195
Ndrg4	1.25707e-16	-0.772596	0.005	0.193	3.51955e-12	1	0.461813
Ttyh1	1.2616e-16	-1.27161	0.308	0.735	3.53223e-12	1	0.28038
Tpx2	1.35507e-16	-1.33204	0.056	0.361	3.79392e-12	1	0.263938
Ndrg1	1.71032e-16	-1.11077	0.059	0.373	4.78856e-12	1	0.329304
Hmgb3	2.10354e-16	-1.20941	0.416	0.831	5.88951e-12	1	0.298372
Tspan17	2.65174e-16	1.872	0.636	0.145	7.42435e-12	1	6.50129
Tmed3	2.82551e-16	-1.1358	0.567	0.867	7.91086e-12	1	0.321166
Mif4gd	1.05052e-15	-1.35591	0.142	0.518	2.94123e-11	1	0.257712
Gng8	4.45309e-15	-1.31947	0.015	0.217	1.24678e-10	1	0.267277
Chchd10	5.08632e-15	0.889278	0.973	0.928	1.42407e-10	1	2.43337
Fuca1	7.4958e-15	-1.25377	0.677	0.904	2.09867e-10	1	0.285427
8030411F24Rik	8.48161e-15	1.35916	0.804	0.506	2.37468e-10	1	3.89292
Slc25a4	8.8775e-15	1.39279	0.8	0.518	2.48552e-10	1	4.02607
Ano1	8.97523e-15	-0.856421	0.015	0.217	2.51288e-10	1	0.424679
Eppin	1.02618e-14	-1.11311	0.575	0.916	2.87311e-10	1	0.328536
Fndc5	1.17321e-14	-1.05891	0.186	0.602	3.28475e-10	1	0.346835
Hmgn3	1.51981e-14	-1.24305	0.191	0.566	4.25517e-10	1	0.288502
Ivd	3.28976e-14	-1.20421	0.068	0.349	9.21066e-10	1	0.299928
Sh2d4a	5.75043e-14	-1.08177	0.049	0.313	1.61e-09	1	0.338995
Tmem189	5.88689e-14	-0.978878	0.024	0.241	1.64821e-09	1	0.375733
Dpysl4	8.7828e-14	-0.967716	0.037	0.277	2.45901e-09	1	0.37995
Gm2a	1.05269e-13	1.14322	0.927	0.88	2.94733e-09	1	3.13686
Dbi	1.15324e-13	1.19668	0.856	0.566	3.22885e-09	1	3.30912
Ftl1	1.23286e-13	-1.08239	0.768	0.964	3.45177e-09	1	0.338786
Mt1	2.18375e-13	-0.780081	0.956	1	6.11407e-09	1	0.458369
Id2	2.28935e-13	-0.978785	0.093	0.41	6.40973e-09	1	0.375768
N4bp3	2.30876e-13	-0.82005	0.005	0.157	6.46407e-09	1	0.44041
Ndufv3	5.17386e-13	1.67463	0.631	0.253	1.44858e-08	1	5.33681
H2-K1	6.09073e-13	-1.12366	0.289	0.663	1.70528e-08	1	0.325089
Cst9	7.5904e-13	-0.534517	0.985	1	2.12516e-08	1	0.585952
Pbk	1.08771e-12	-0.844182	0.064	0.337	3.04537e-08	1	0.429909
Bscl2	1.1414e-12	-1.17449	0.21	0.578	3.19568e-08	1	0.308978
Hsd17b1	1.41296e-12	-0.617124	0	0.12	3.95602e-08	1	0.539494
Oat	1.89224e-12	-1.21294	0.181	0.518	5.2979e-08	1	0.29732
Amy1	2.19122e-12	-1.00851	0.039	0.265	6.13497e-08	1	0.364763
S100b	2.73524e-12	-0.677722	0.002	0.133	7.65812e-08	1	0.507772
Creg1	2.98689e-12	-0.966139	0.553	0.867	8.36271e-08	1	0.380549
Myh13	3.25286e-12	-0.567598	0.007	0.157	9.10735e-08	1	0.566885
Cdo1	3.63597e-12	-0.984693	0.056	0.301	1.018e-07	1	0.373554
Ptgr1	3.67739e-12	1.3564	0.645	0.217	1.0296e-07	1	3.88218
Camk2n2	3.72995e-12	-0.591662	0.007	0.157	1.04431e-07	1	0.553407
Calr4	3.90093e-12	-0.988607	0.1	0.398	1.09218e-07	1	0.372095
Corin	4.09346e-12	-1.31784	0.122	0.422	1.14609e-07	1	0.267714
Naglu	4.44234e-12	-1.12351	0.1	0.398	1.24377e-07	1	0.325136
Hmbs	5.70692e-12	-1.00491	0.125	0.446	1.59782e-07	1	0.366077
Akr1b3	7.71423e-12	-0.778305	0.834	0.952	2.15983e-07	1	0.459184
Slc22a17	8.30224e-12	-0.950155	0.061	0.313	2.32446e-07	1	0.386681
Siva1	9.01735e-12	1.56621	0.56	0.133	2.52468e-07	1	4.78847
Pfdn1	1.55244e-11	1.2348	0.667	0.313	4.34653e-07	1	3.43769
Kdsr	2.78419e-11	-0.963251	0.081	0.349	7.79516e-07	1	0.38165
Arhgap31	4.55865e-11	-0.555553	0.007	0.145	1.27633e-06	1	0.573755
Mgarp	5.19334e-11	1.45756	0.513	0.096	1.45403e-06	1	4.29545
Cox5a	5.51507e-11	0.947245	0.87	0.735	1.54411e-06	1	2.5786
Serf1	8.94443e-11	0.966023	0.851	0.627	2.50426e-06	1	2.62747
Shf	9.28962e-11	-0.688558	0.015	0.169	2.60091e-06	1	0.5023
Ctsd	9.68593e-11	-1.11	0.274	0.602	2.71187e-06	1	0.329557
Fabp5	1.10544e-10	-1.02095	0.276	0.639	3.09502e-06	1	0.360251
Slc13a2	1.14911e-10	-0.748992	0.015	0.169	3.21727e-06	1	0.472843
Drd4	1.62144e-10	-1.38095	0.169	0.47	4.53972e-06	1	0.25134
Smco4	1.65998e-10	-0.746558	0.066	0.313	4.6476e-06	1	0.473995
Mfge8	1.77792e-10	-1.56911	0.335	0.614	4.97781e-06	1	0.208231
Aldh1a1	2.02692e-10	-1.01433	0.421	0.747	5.67496e-06	1	0.362645
Adgrl1	2.27539e-10	-0.850204	0.088	0.349	6.37063e-06	1	0.427328
Ppm1m	2.35661e-10	1.46354	0.467	0.084	6.59803e-06	1	4.32123
Sf3b2	2.69722e-10	-1.02793	0.171	0.482	7.55167e-06	1	0.357747
Amhr2	2.79003e-10	-0.775254	0.895	0.976	7.81152e-06	1	0.460587
Hspb1	3.10065e-10	-0.808084	0.77	0.964	8.68121e-06	1	0.445711
Psap	3.10866e-10	-0.984661	0.653	0.904	8.70364e-06	1	0.373566
Pros1	3.12917e-10	-0.934658	0.156	0.47	8.76106e-06	1	0.39272
Gpc4	3.42193e-10	-1.14926	0.144	0.434	9.58071e-06	1	0.31687
Clic1	4.58183e-10	1.00141	0.795	0.518	1.28282e-05	1	2.72212
Ly6c1	4.94559e-10	-0.651861	0.007	0.133	1.38467e-05	1	0.521075
H2afx	5.62754e-10	-0.835671	0.098	0.361	1.5756e-05	1	0.433583
Tmprss6	5.75949e-10	-0.39742	0.005	0.12	1.61254e-05	1	0.672052
Itm2b	6.28175e-10	-0.707284	0.836	0.976	1.75876e-05	1	0.492981
Maged1	7.28134e-10	-0.886814	0.577	0.855	2.03863e-05	1	0.411966
Tmem255a	7.54541e-10	1.53883	0.391	0.036	2.11256e-05	1	4.65914
Cyth2	7.73983e-10	-0.955614	0.443	0.747	2.167e-05	1	0.384576
Fgfrl1	7.93792e-10	-0.67002	0.015	0.157	2.22246e-05	1	0.511698
Gaa	8.01147e-10	-0.963442	0.115	0.386	2.24305e-05	1	0.381577
1500009L16Rik	8.23776e-10	1.35763	0.582	0.253	2.30641e-05	1	3.88696
Arf5	8.80538e-10	0.952816	0.822	0.578	2.46533e-05	1	2.593
Myzap	8.84079e-10	-0.781228	0.044	0.241	2.47524e-05	1	0.457843
Htatsf1	9.53417e-10	-1.02234	0.235	0.566	2.66938e-05	1	0.359754
Rgs2	1.31049e-09	-0.800534	0.088	0.337	3.66912e-05	1	0.449089
Sfxn3	1.70546e-09	-0.715713	0.093	0.349	4.77495e-05	1	0.488843
Tst	1.71477e-09	1.07691	0.707	0.373	4.80101e-05	1	2.9356
Gatm	2.23969e-09	-0.575667	0.905	0.988	6.27068e-05	1	0.562329
Ndufa6	2.29882e-09	0.964797	0.768	0.59	6.43624e-05	1	2.62425
Serpini1	2.34813e-09	-0.850008	0.09	0.337	6.57428e-05	1	0.427412
Ajuba	2.59299e-09	-0.668469	0.056	0.265	7.25985e-05	1	0.512493
Sh3gl3	2.65013e-09	1.48814	0.352	0.024	7.41984e-05	1	4.42884
Fam181b	3.30003e-09	-0.75657	0.073	0.301	9.23941e-05	1	0.469273
BC022687	3.45084e-09	-0.856881	0.149	0.434	9.66168e-05	1	0.424484
Maged2	3.58162e-09	-0.875109	0.384	0.699	0.000100278	1	0.416816
Cidea	3.73943e-09	1.26185	0.479	0.12	0.000104696	1	3.53196
Cldn23	3.90627e-09	-0.557059	0.01	0.133	0.000109368	1	0.572891
Lrpap1	3.90906e-09	-0.897381	0.391	0.699	0.000109446	1	0.407636
Slc7a4	3.97725e-09	-0.979109	0.284	0.602	0.000111355	1	0.375646
Bik	4.46651e-09	1.32364	0.413	0.072	0.000125053	1	3.75706
Nudt10	5.04806e-09	-0.532935	0.007	0.12	0.000141336	1	0.58688
Art3	5.27848e-09	-0.889162	0.11	0.361	0.000147787	1	0.411
Amn	5.33289e-09	-0.525671	0.007	0.12	0.00014931	1	0.591159
Atox1	5.8741e-09	0.857328	0.853	0.723	0.000164463	1	2.35685
Med4	5.98587e-09	-0.778862	0.159	0.458	0.000167592	1	0.458928
Dct	6.0244e-09	-0.461562	0.005	0.108	0.000168671	1	0.630299
Cyb5a	6.37826e-09	1.14173	0.648	0.361	0.000178578	1	3.13219
Mapre2	6.3922e-09	-0.433237	0.005	0.108	0.000178969	1	0.648407
Mid1ip1	6.97409e-09	-0.959267	0.152	0.422	0.00019526	1	0.383174
Rab30	7.19447e-09	-0.364489	0.005	0.108	0.000201431	1	0.694552
Gm7325	7.33738e-09	-0.545087	0.005	0.108	0.000205432	1	0.579791
Aldh1a7	7.48304e-09	-0.415687	0.005	0.108	0.00020951	1	0.659887
Hist3h2a	7.59152e-09	-0.675426	0.049	0.241	0.000212547	1	0.50894
Dhrs7	9.74239e-09	1.28123	0.428	0.084	0.000272767	1	3.60107
Ssbp4	9.9138e-09	-0.82571	0.105	0.349	0.000277567	1	0.437924
Slc7a6	1.22713e-08	-0.619637	0.054	0.253	0.000343571	1	0.53814
Wfdc1	1.31578e-08	1.46585	0.433	0.096	0.000368393	1	4.33124
Actn3	1.35111e-08	-0.909778	0.059	0.253	0.000378285	1	0.402614
Clu	1.54214e-08	-0.700947	0.941	0.988	0.000431769	1	0.496115
Calr	1.54226e-08	-0.890024	0.692	0.88	0.000431801	1	0.410646
Rgma	1.66512e-08	-0.644327	0.012	0.133	0.0004662	1	0.525016
Pttg1ip	1.927e-08	-0.862001	0.381	0.675	0.000539521	1	0.422316
Kdelr2	2.92471e-08	1.3981	0.477	0.157	0.000818861	1	4.04751
Mylk	2.98344e-08	-0.798666	0.205	0.494	0.000835304	1	0.449929
Acsbg1	3.04586e-08	-0.89141	0.369	0.651	0.000852781	1	0.410077
Svs6	3.39664e-08	-0.517526	0.01	0.12	0.000950991	1	0.595993
Ar	4.03789e-08	-0.487617	0.017	0.145	0.00113053	1	0.614088
1700011M02Rik	4.11392e-08	0.600737	0.971	0.964	0.00115181	1	1.82346
Cited1	4.18147e-08	-0.654023	0.797	0.928	0.00117073	1	0.51995
Sod3	5.30397e-08	1.46033	0.43	0.133	0.001485	1	4.30737
Ndufa3	5.34302e-08	0.812994	0.778	0.554	0.00149594	1	2.25465
Gstm1	5.69071e-08	-0.539481	0.868	0.94	0.00159328	1	0.583051
Cd81	5.92229e-08	-1.14632	0.555	0.771	0.00165812	1	0.317803
Myo5a	6.32389e-08	-0.446514	0.007	0.108	0.00177056	1	0.639855
Sil1	7.04828e-08	-0.74025	0.176	0.458	0.00197338	1	0.476995
Cmtm3	7.7345e-08	-0.667237	0.09	0.313	0.0021655	1	0.513124
Sec62	8.29594e-08	-0.857579	0.411	0.711	0.0023227	1	0.424188
Tmem52	8.66455e-08	-0.968753	0.259	0.518	0.0024259	1	0.379556
H2afj	9.52597e-08	-0.924986	0.333	0.614	0.00266708	1	0.396537
Hspa5	9.82413e-08	-0.852459	0.57	0.795	0.00275056	1	0.426365
Galnt18	1.0066e-07	-0.526543	0.015	0.133	0.00281828	1	0.590643
Tcn2	1.09851e-07	-0.614932	0.042	0.205	0.00307559	1	0.540677
Hmg20b	1.58533e-07	1.07301	0.584	0.337	0.00443862	1	2.92416
Fam134b	1.61471e-07	-0.637952	0.059	0.241	0.00452087	1	0.528373
Atpif1	1.73069e-07	0.659291	0.902	0.843	0.0048456	1	1.93342
Ndufs5	1.93399e-07	0.865794	0.702	0.482	0.00541478	1	2.37689
Atp6ap2	1.9836e-07	-0.834411	0.186	0.458	0.00555369	1	0.43413
Slc16a3	2.08552e-07	-0.568466	0.012	0.12	0.00583904	1	0.566394
Efhd1	2.14535e-07	1.16959	0.462	0.169	0.00600655	1	3.22068
Manf	2.14682e-07	0.665547	0.914	0.795	0.00601067	1	1.94555
Mgst1	2.60687e-07	1.0395	0.601	0.349	0.0072987	1	2.8278
Gnai2	2.75732e-07	-0.735777	0.511	0.771	0.00771995	1	0.479133
Wnt6	2.83742e-07	-0.855493	0.117	0.337	0.0079442	1	0.425073
Prdx5	2.95515e-07	0.931895	0.491	0.193	0.00827383	1	2.53932
Pde4b	2.95815e-07	-0.583233	0.034	0.181	0.00828224	1	0.558091
Gm5900	3.15952e-07	-0.596984	0.073	0.265	0.00884603	1	0.550469
Dll3	3.23016e-07	-0.646909	0.034	0.181	0.00904381	1	0.523662
Cks2	3.47401e-07	1.22585	0.487	0.229	0.00972652	1	3.40705
Wipf3	3.52849e-07	-0.901591	0.161	0.398	0.00987905	1	0.405923
Dixdc1	3.9272e-07	-0.540134	0.022	0.145	0.0109954	1	0.58267
Svs5	3.98072e-07	-0.977976	0.122	0.337	0.0111452	1	0.376072
Fam53a	4.43278e-07	-0.812978	0.132	0.361	0.0124109	1	0.443535
Ebp	4.60024e-07	-0.677955	0.357	0.663	0.0128797	1	0.507654
Higd1a	4.84755e-07	0.978681	0.599	0.349	0.0135722	1	2.66094
Bbx	5.1955e-07	-0.876172	0.293	0.566	0.0145464	1	0.416374
Wfdc9	5.50607e-07	-0.785341	0.071	0.253	0.0154159	1	0.455964
Isoc2b	5.61661e-07	1.37417	0.262	0.012	0.0157254	1	3.9518
Cdk5	5.76918e-07	1.07934	0.523	0.277	0.0161525	1	2.94273
Hn1	6.41757e-07	0.755332	0.76	0.554	0.0179679	1	2.12832
Dstn	7.269e-07	0.860117	0.67	0.434	0.0203518	1	2.36344
Tom1l1	7.38562e-07	-0.695621	0.054	0.217	0.0206783	1	0.498764
Rps6kb1	7.39973e-07	-0.525759	0.015	0.12	0.0207178	1	0.591106
Sbk1	7.63817e-07	-0.657476	0.078	0.265	0.0213853	1	0.518157
Ptgds	7.84626e-07	-1.44743	0.641	0.735	0.0219679	1	0.235173
Cadm1	8.0921e-07	-0.76675	0.408	0.675	0.0226563	1	0.46452
Myo10	8.1508e-07	-0.718659	0.137	0.373	0.0228206	1	0.487405
1700024P16Rik	8.23121e-07	-0.578697	0.049	0.205	0.0230458	1	0.560628
Rnpep	8.43888e-07	-0.594337	0.059	0.229	0.0236272	1	0.551928
Myo7a	8.45745e-07	-0.724567	0.125	0.337	0.0236792	1	0.484534
Pcsk1n	8.86148e-07	0.892508	0.768	0.602	0.0248104	1	2.44124
Ssr1	8.93305e-07	-0.665766	0.269	0.554	0.0250107	1	0.51388
Tubb3	9.10058e-07	1.09156	0.584	0.325	0.0254798	1	2.97892
Dnajc9	9.42645e-07	-0.690039	0.09	0.289	0.0263922	1	0.501557
Eef1d	1.08197e-06	-0.710371	0.472	0.699	0.0302929	1	0.491462
Bcl7c	1.15396e-06	-0.764379	0.081	0.265	0.0323086	1	0.465623
Echs1	1.20426e-06	0.994138	0.511	0.217	0.033717	1	2.70239
Mxra7	1.20514e-06	1.13578	0.286	0.036	0.0337414	1	3.1136
Qpct	1.26568e-06	-0.628843	0.66	0.855	0.0354365	1	0.533208
Ccdc107	1.29413e-06	1.16035	0.323	0.06	0.0362331	1	3.19104
Rnaset2a	1.31295e-06	1.10938	0.384	0.12	0.0367601	1	3.03248
Ddah2	1.36296e-06	1.15431	0.391	0.133	0.0381601	1	3.17185
Cldn11	1.37372e-06	-0.645872	0.844	0.916	0.0384615	1	0.524205
Fut8	1.62335e-06	-0.500167	0.044	0.193	0.0454506	1	0.60643
Fam213a	1.62608e-06	1.06657	0.479	0.205	0.0455271	1	2.90538
Pla2g7	1.83697e-06	1.33952	0.345	0.096	0.0514316	1	3.81721
Slc29a1	2.00989e-06	-0.588748	0.188	0.446	0.0562729	1	0.555022
Galc	2.05506e-06	-0.284637	0.012	0.108	0.0575376	1	0.752287
Qsox1	2.07189e-06	-0.694061	0.306	0.59	0.0580088	1	0.499543
Prss45	2.44467e-06	-0.538902	0.017	0.12	0.0684459	1	0.583389
Cdc42	2.55786e-06	0.751089	0.648	0.422	0.0716148	1	2.11931
Gm9112	2.71399e-06	0.566291	0.956	0.94	0.0759863	1	1.76172
Spink8	2.90276e-06	-0.500476	0.022	0.133	0.0812714	1	0.606242
Ccdc28b	2.95765e-06	1.11491	0.408	0.157	0.0828082	1	3.04929
Ero1l	3.01701e-06	-0.594964	0.032	0.157	0.0844702	1	0.551583
Akap12	3.1458e-06	-0.759469	0.46	0.699	0.088076	1	0.467915
Slc9a3r1	3.25175e-06	1.08186	0.306	0.06	0.0910426	1	2.95015
Pomp	3.2704e-06	0.901958	0.665	0.542	0.0915645	1	2.46442
Thra	3.34417e-06	-0.404128	0.017	0.12	0.0936301	1	0.667559
Tubgcp5	3.432e-06	-0.372177	0.017	0.12	0.0960891	1	0.689232
Epb41	3.43495e-06	-0.468172	0.022	0.133	0.0961718	1	0.626146
Rpl13	3.46302e-06	0.474432	0.966	0.964	0.0969577	1	1.6071
Jam2	3.48091e-06	-0.73139	0.078	0.253	0.0974586	1	0.48124
Alg1	3.70894e-06	-0.488484	0.064	0.229	0.103843	1	0.613556
Fuca2	3.83371e-06	-0.908949	0.264	0.506	0.107336	1	0.402947
Adgrg1	3.94735e-06	-0.762258	0.13	0.337	0.110518	1	0.466612
Cotl1	4.0858e-06	1.0117	0.313	0.06	0.114394	1	2.75027
Rab3b	4.56601e-06	-0.563034	0.066	0.229	0.127839	1	0.569479
Ndufc1	4.89872e-06	0.889682	0.716	0.542	0.137154	1	2.43435
Slc26a2	5.02111e-06	-0.544494	0.037	0.169	0.140581	1	0.580135
Ppp1r16b	5.17584e-06	-0.55604	0.015	0.108	0.144913	1	0.573476
Wbp2	5.25743e-06	-0.666029	0.178	0.41	0.147198	1	0.513745
Cmtm6	5.32156e-06	-0.759884	0.186	0.41	0.148993	1	0.467721
Dusp15	5.44022e-06	-0.651304	0.095	0.277	0.152315	1	0.521365
1600012H06Rik	5.77521e-06	-0.537442	0.086	0.265	0.161694	1	0.584241
Pkdcc	6.25068e-06	-0.366145	0.015	0.108	0.175007	1	0.693402
Fam122a	6.87864e-06	-0.599126	0.02	0.12	0.192588	1	0.549291
Cdk20	7.24186e-06	-0.358092	0.015	0.108	0.202758	1	0.699009
Ank	7.41198e-06	-0.637503	0.046	0.181	0.20752	1	0.52861
4930502E18Rik	7.50849e-06	-0.673978	0.083	0.253	0.210223	1	0.509677
Bex4	7.91845e-06	0.610168	0.866	0.795	0.221701	1	1.84074
Rab13	7.96616e-06	1.08619	0.323	0.084	0.223037	1	2.96295
Atp6v0b	8.1507e-06	-0.717552	0.489	0.699	0.228203	1	0.487945
Lamtor3	8.37186e-06	-0.576605	0.076	0.241	0.234395	1	0.561803
1700030K09Rik	8.56055e-06	-0.565288	0.056	0.205	0.239678	1	0.568196
Inpp5b	8.83635e-06	-0.625656	0.09	0.265	0.2474	1	0.53491
Rnd2	8.85544e-06	1.04129	0.286	0.048	0.247935	1	2.83288
Fndc3b	8.85575e-06	-0.500027	0.073	0.241	0.247943	1	0.606514
Gnai1	8.88164e-06	-0.582979	0.051	0.193	0.248668	1	0.558233
Akt2	9.01779e-06	-0.673499	0.117	0.313	0.25248	1	0.509921
Drap1	9.28253e-06	-0.766937	0.247	0.47	0.259892	1	0.464434
Tiam1	9.28469e-06	-0.601627	0.098	0.277	0.259953	1	0.54792
Ucp2	1.00426e-05	0.80719	0.501	0.241	0.281174	1	2.2416
Ppp1r2	1.00466e-05	-0.581194	0.374	0.663	0.281285	1	0.55923
Tuba1a	1.03942e-05	0.661038	0.866	0.747	0.291017	1	1.9368
Hexa	1.04858e-05	-0.681548	0.465	0.747	0.293583	1	0.505833
Rgcc	1.06046e-05	-0.727848	0.193	0.41	0.296909	1	0.482947
Kcnk13	1.07135e-05	-0.461945	0.029	0.145	0.299957	1	0.630057
Atp1a1	1.09271e-05	-0.551094	0.401	0.687	0.305937	1	0.576319
Cpe	1.09645e-05	-0.619499	0.447	0.735	0.306984	1	0.538214
Ctnnal1	1.12413e-05	-0.541319	0.11	0.301	0.314734	1	0.58198
Araf	1.16794e-05	-0.496582	0.051	0.193	0.326999	1	0.608607
Gatsl3	1.21444e-05	0.985704	0.196	0	0.340018	1	2.6797
Il10rb	1.32376e-05	-0.797678	0.13	0.313	0.370628	1	0.450374
1810037I17Rik	1.42855e-05	0.747463	0.721	0.578	0.399965	1	2.11164
Sptbn1	1.43255e-05	-0.637355	0.059	0.205	0.401085	1	0.528689
Gabarapl1	1.49971e-05	-0.573278	0.381	0.687	0.419888	1	0.563675
Ctsa	1.51082e-05	-0.426993	0.073	0.241	0.422999	1	0.652468
Minos1	1.62614e-05	0.622225	0.814	0.759	0.455288	1	1.86307
Mtap7d3	1.62743e-05	1.04071	0.191	0	0.455647	1	2.83122
Epn1	1.6613e-05	-0.650698	0.178	0.386	0.465131	1	0.521681
Sowahd	1.67479e-05	0.913063	0.232	0.024	0.468907	1	2.49194
Mfsd7c	1.68665e-05	-0.628286	0.066	0.217	0.472229	1	0.533506
Imp3	1.71644e-05	-0.721505	0.166	0.373	0.480568	1	0.48602
Phf20	1.73196e-05	-0.576263	0.115	0.301	0.484914	1	0.561995
Ap2m1	1.78157e-05	-0.694854	0.369	0.602	0.498804	1	0.499147
Spint2	1.79354e-05	0.632153	0.785	0.663	0.502156	1	1.88166
Erp29	1.84163e-05	-0.704176	0.697	0.819	0.515618	1	0.494516
Cmbl	1.88252e-05	0.902897	0.188	0	0.527067	1	2.46674
Ints2	1.89771e-05	-0.604773	0.032	0.145	0.531319	1	0.546198
Aldh1b1	2.03786e-05	1.03271	0.271	0.06	0.570559	1	2.80868
Sfxn1	2.21089e-05	0.940755	0.244	0.036	0.619004	1	2.56191
Nsdhl	2.63042e-05	-0.425556	0.037	0.157	0.736466	1	0.653406
Phf8	2.70001e-05	-0.425986	0.049	0.181	0.75595	1	0.653126
Abracl	2.72089e-05	-0.5715	0.259	0.482	0.761793	1	0.564678
Slc2a3	2.73162e-05	-0.583349	0.154	0.361	0.764798	1	0.558027
Cgrrf1	2.7344e-05	-0.519581	0.073	0.229	0.765578	1	0.59477
Tmem206	2.88069e-05	-0.641346	0.152	0.349	0.806535	1	0.526583
Klhl23	3.07854e-05	-0.619092	0.24	0.458	0.86193	1	0.538433
Dnajb9	3.17547e-05	-0.507489	0.161	0.373	0.889068	1	0.602005
Tmem51	3.47938e-05	0.899244	0.213	0.024	0.974157	1	2.45774
Tmem147	3.55181e-05	0.859388	0.531	0.301	0.994436	1	2.36171
Sema3c	3.56936e-05	-0.643599	0.083	0.241	0.99935	1	0.525398
Gnl3	3.65893e-05	-0.568508	0.064	0.205	1	1	0.56637
Alad	3.69232e-05	-0.707317	0.518	0.711	1	1	0.492965
Cd302	3.87898e-05	0.785905	0.594	0.398	1	1	2.19439
Npr1	4.05248e-05	-0.705288	0.139	0.325	1	1	0.493966
Zfyve27	4.10853e-05	-0.490725	0.039	0.157	1	1	0.612183
Lamp2	4.15427e-05	-0.615144	0.137	0.325	1	1	0.540563
Etl4	4.27747e-05	-0.482912	0.034	0.145	1	1	0.616984
Tmed9	4.64856e-05	-0.748703	0.394	0.602	1	1	0.472979
Casp6	4.6654e-05	0.983645	0.286	0.084	1	1	2.67419
Cln5	4.69897e-05	-0.41337	0.034	0.145	1	1	0.661417
Tmpo	4.94868e-05	-0.451411	0.083	0.241	1	1	0.636729
Kif5b	5.07852e-05	-0.585226	0.227	0.47	1	1	0.55698
Znfx1	5.13431e-05	-0.455182	0.039	0.157	1	1	0.634332
Rpl39	5.22004e-05	0.6336	0.802	0.723	1	1	1.88438
Fez2	5.24274e-05	0.834	0.281	0.072	1	1	2.30251
Tor1b	5.45225e-05	-0.435717	0.024	0.12	1	1	0.646801
Sphk2	5.53033e-05	-0.59171	0.122	0.301	1	1	0.55338
Tox	5.62225e-05	-0.386038	0.029	0.133	1	1	0.679745
Tbrg1	5.67692e-05	0.908985	0.406	0.193	1	1	2.4818
1700007G11Rik	5.68679e-05	-0.541569	0.024	0.12	1	1	0.581835
Pdzd11	5.72527e-05	-0.543133	0.232	0.458	1	1	0.580925
Wbp1l	5.75648e-05	-0.490051	0.064	0.205	1	1	0.612595
Atp1b2	5.80895e-05	-0.587704	0.125	0.301	1	1	0.555601
Reps1	5.84781e-05	-0.43281	0.029	0.133	1	1	0.648684
Lamp1	5.8659e-05	-0.660498	0.479	0.687	1	1	0.516594
Scara5	6.06438e-05	-0.489515	0.134	0.325	1	1	0.612923
Chit1	6.12039e-05	-0.495103	0.024	0.12	1	1	0.609508
Sestd1	6.14184e-05	-0.439862	0.029	0.133	1	1	0.644125
Tns3	6.24994e-05	-0.351217	0.024	0.12	1	1	0.703831
Lmo2	6.37104e-05	-0.486674	0.059	0.193	1	1	0.614668
Dzip3	6.58521e-05	-0.410722	0.024	0.12	1	1	0.663171
H2-DMa	6.64211e-05	0.877844	0.244	0.048	1	1	2.40571
Plp1	6.64728e-05	0.912299	0.262	0.06	1	1	2.49004
Myo5b	7.23201e-05	-0.322021	0.024	0.12	1	1	0.724683
Tgoln1	7.74841e-05	-0.659744	0.166	0.349	1	1	0.516984
Zwint	7.95627e-05	-0.592374	0.286	0.506	1	1	0.553013
Bop1	8.00109e-05	-0.566308	0.125	0.301	1	1	0.567617
Utrn	8.43595e-05	-0.458573	0.049	0.169	1	1	0.632185
Aard	8.43853e-05	-0.308921	0.971	1	1	1	0.734239
Pycard	8.48164e-05	-0.389544	0.042	0.157	1	1	0.677366
Galk2	8.62655e-05	-0.481429	0.037	0.145	1	1	0.6179
Atp2b4	8.63618e-05	-0.427037	0.066	0.205	1	1	0.65244
2700060E02Rik	9.02727e-05	0.737449	0.528	0.289	1	1	2.0906
Zdhhc6	9.04215e-05	-0.382675	0.054	0.181	1	1	0.682034
Scand1	9.10973e-05	0.713756	0.65	0.458	1	1	2.04165
Noa1	9.58904e-05	-0.359028	0.042	0.157	1	1	0.698355
Scarb1	9.64017e-05	0.98233	0.369	0.169	1	1	2.67067
Pigs	9.65277e-05	-0.541419	0.112	0.277	1	1	0.581922
Tnpo3	9.76357e-05	-0.506841	0.056	0.181	1	1	0.602396
Zfp932	0.000101336	-0.458859	0.049	0.169	1	1	0.632005
Rpn2	0.000102315	-0.50373	0.433	0.663	1	1	0.604273
1700019B21Rik	0.000102971	0.528798	0.844	0.578	1	1	1.69689
Acaa2	0.000103739	0.913421	0.296	0.096	1	1	2.49284
Zeb2	0.000106849	-0.474787	0.044	0.157	1	1	0.622018
Polr1d	0.000107126	0.699567	0.672	0.566	1	1	2.01288
Tspan4	0.000114193	-0.435183	0.022	0.108	1	1	0.647146
Zfp148	0.000114329	-0.487648	0.056	0.181	1	1	0.614069
Nampt	0.000115401	-0.572163	0.105	0.265	1	1	0.564303
Jsrp1	0.0001211	-0.488367	0.068	0.205	1	1	0.613627
Aldh1a2	0.000124557	-0.455206	0.027	0.12	1	1	0.634317
Gm15543	0.000124929	0.858963	0.391	0.181	1	1	2.36071
Napepld	0.000126302	-0.343966	0.061	0.193	1	1	0.708953
Atp5j	0.000134076	0.548841	0.736	0.602	1	1	1.73124
Cox7c	0.000135266	0.451037	0.863	0.759	1	1	1.56994
Cdc42ep5	0.000135999	0.716683	0.43	0.205	1	1	2.04763
Marcks	0.000137489	-0.793395	0.306	0.494	1	1	0.452306
Topbp1	0.000140114	-0.385664	0.027	0.12	1	1	0.679999
Rnf111	0.00014149	-0.30904	0.027	0.12	1	1	0.734151
2310030G06Rik	0.000148728	-0.355304	0.022	0.108	1	1	0.700961
Rpl34	0.000157721	0.536331	0.787	0.675	1	1	1.70972
Gpt2	0.000158885	-0.492109	0.064	0.193	1	1	0.611335
Polr2e	0.000159651	-0.519152	0.252	0.47	1	1	0.595025
Tmem59	0.000162242	-0.595744	0.533	0.735	1	1	0.551152
Fkbp9	0.000163269	-0.547667	0.078	0.217	1	1	0.578297
Hdgfrp3	0.000165122	-0.319797	0.022	0.108	1	1	0.726296
Nxf3	0.000166027	-0.417743	0.134	0.313	1	1	0.658531
Olfml2b	0.000168248	-0.749323	0.073	0.205	1	1	0.472686
Slc39a7	0.000169281	-0.50227	0.159	0.349	1	1	0.605155
Fstl3	0.00016938	0.827495	0.232	0.048	1	1	2.28758
Slc41a3	0.000170006	-0.544213	0.125	0.289	1	1	0.580298
Asah1	0.000170092	-0.571863	0.218	0.41	1	1	0.564473
Shc4	0.000175391	-0.517095	0.046	0.157	1	1	0.59625
Spsb1	0.000182063	-0.251351	0.027	0.12	1	1	0.777749
B3gnt8	0.000185294	-0.360079	0.039	0.145	1	1	0.697621
Cryz	0.00018658	0.817516	0.222	0.048	1	1	2.26487
Serf2	0.000194431	0.467229	0.895	0.867	1	1	1.59557
Hmgn5	0.000195335	-0.715342	0.323	0.506	1	1	0.489025
Smarca4	0.000195586	-0.542972	0.108	0.265	1	1	0.581019
Mpzl1	0.000197147	-0.62689	0.301	0.518	1	1	0.534251
Rpl11	0.000198129	0.40154	0.914	0.867	1	1	1.49412
Slc39a6	0.000198491	-0.736605	0.178	0.361	1	1	0.478736
Rps27l	0.000204049	0.608018	0.685	0.566	1	1	1.83679
Tsx	0.000211139	-0.43193	0.888	0.952	1	1	0.649255
Txndc5	0.000220025	0.830473	0.389	0.205	1	1	2.2944
Cdkn2b	0.000223316	-0.49309	0.073	0.205	1	1	0.610736
Sod2	0.000227841	0.787237	0.445	0.265	1	1	2.19732
Gas2l1	0.000230497	-0.534366	0.416	0.651	1	1	0.586041
1810058I24Rik	0.000238007	0.564835	0.802	0.759	1	1	1.75916
Nsmce4a	0.000239423	0.719053	0.315	0.12	1	1	2.05249
Zfp410	0.000241548	-0.330687	0.051	0.169	1	1	0.71843
Rbmxl1	0.000242246	-0.4826	0.081	0.217	1	1	0.617177
Kctd12	0.000244041	-0.468038	0.088	0.229	1	1	0.62623
Rps29	0.000244653	0.334934	0.995	1	1	1	1.39785
Cox6c	0.000244945	0.494018	0.912	0.843	1	1	1.63889
Tm2d3	0.000249102	-0.324623	0.064	0.193	1	1	0.7228
Pja1	0.000251452	-0.584763	0.24	0.446	1	1	0.557238
Rps11	0.000251744	0.487424	0.883	0.892	1	1	1.62812
Nenf	0.000253503	-0.524532	0.731	0.867	1	1	0.591832
Tsc22d1	0.000255913	-0.537642	0.572	0.735	1	1	0.584124
Amigo2	0.00026208	-0.446283	0.024	0.108	1	1	0.640003
Slc30a5	0.000267351	-0.37391	0.029	0.12	1	1	0.688039
Pdia6	0.000270969	-0.550465	0.406	0.639	1	1	0.576682
Med10	0.000278517	0.472915	0.863	0.831	1	1	1.60467
Rpl32	0.000281957	0.465706	0.875	0.831	1	1	1.59314
Tspan7	0.000282488	-0.362633	0.029	0.12	1	1	0.695842
Tmem180	0.00029425	0.863976	0.254	0.084	1	1	2.37258
Vsig10	0.000294775	-0.483023	0.061	0.181	1	1	0.616916
Rnaseh2a	0.000295178	-0.474234	0.286	0.506	1	1	0.622361
Hebp1	0.000297506	0.764804	0.235	0.06	1	1	2.14857
Sptlc2	0.00030248	-0.363922	0.054	0.169	1	1	0.694946
Gprasp2	0.000303471	-0.520815	0.142	0.313	1	1	0.594036
Ankrd2	0.000304188	-0.444219	0.042	0.145	1	1	0.641325
Acat2	0.000309114	-0.438714	0.054	0.169	1	1	0.644865
Rilpl2	0.000309213	0.834086	0.306	0.12	1	1	2.30271
Arl3	0.000309339	-0.499526	0.23	0.434	1	1	0.606818
Oaz1	0.000311112	0.540369	0.846	0.771	1	1	1.71664
4930455G09Rik	0.000318748	0.85957	0.159	0.012	1	1	2.36214
Chpt1	0.000332611	0.770879	0.176	0.024	1	1	2.16166
Psmb6	0.000333724	0.566702	0.638	0.482	1	1	1.76245
Ank3	0.000334835	-0.284005	0.024	0.108	1	1	0.752763
Man1a2	0.000335196	-0.41142	0.073	0.205	1	1	0.662709
Klc2	0.000339235	-0.585182	0.23	0.434	1	1	0.557004
Desi2	0.000340107	-0.412138	0.042	0.145	1	1	0.662233
Xkr8	0.000343883	-0.430217	0.037	0.133	1	1	0.650368
Mlec	0.000345163	-0.549071	0.242	0.446	1	1	0.577486
Psmd2	0.00034834	-0.405173	0.386	0.614	1	1	0.666861
Apoa2	0.000348483	-0.790703	0.279	0.458	1	1	0.453526
Ywhab	0.000351003	-0.422315	0.391	0.639	1	1	0.655527
Lgmn	0.000360865	1.11185	0.567	0.458	1	1	3.03996
Gabarapl2	0.000364194	0.599641	0.619	0.422	1	1	1.82146
Gnas	0.000365364	0.491524	0.768	0.651	1	1	1.63481
Slc38a2	0.000366983	-0.27363	0.066	0.193	1	1	0.760613
Ppp1r14b	0.00037085	-0.437453	0.142	0.313	1	1	0.645679
Safb2	0.000375255	-0.377754	0.054	0.169	1	1	0.685399
Tnik	0.000375723	-0.355089	0.073	0.205	1	1	0.701111
Rmnd5b	0.000377056	-0.510302	0.183	0.373	1	1	0.600314
Zfp385a	0.000379268	-0.555815	0.078	0.205	1	1	0.573605
Rpl31	0.000381168	0.465627	0.809	0.723	1	1	1.59301
Anapc5	0.000381879	-0.593182	0.323	0.518	1	1	0.552566
Mrpl3	0.000386453	-0.486908	0.171	0.349	1	1	0.614524
Plin2	0.000387812	-0.417386	0.049	0.157	1	1	0.658767
Btd	0.000387812	-0.49695	0.049	0.157	1	1	0.608383
Fkbp5	0.000392132	-0.38999	0.042	0.145	1	1	0.677064
Rangap1	0.000404844	-0.434622	0.161	0.337	1	1	0.647509
Pfkl	0.000407562	0.883592	0.284	0.108	1	1	2.41957
Spg20	0.000410161	-0.451299	0.056	0.169	1	1	0.6368
Gtf2b	0.00041142	-0.55082	0.213	0.398	1	1	0.576477
Phactr4	0.000420333	-0.413242	0.056	0.169	1	1	0.661502
Acbd5	0.000432479	-0.701245	0.125	0.265	1	1	0.495968
Arxes2	0.000438206	-0.546085	0.279	0.47	1	1	0.579213
Prr3	0.000439681	-0.385789	0.049	0.157	1	1	0.679914
Fam49b	0.000441637	-0.614471	0.196	0.373	1	1	0.540927
Adora1	0.000444135	-0.587248	0.161	0.325	1	1	0.555855
Lman2l	0.00044884	-0.424259	0.032	0.12	1	1	0.654254
Pdcd4	0.000451887	-0.570988	0.227	0.41	1	1	0.564967
Sdhb	0.000452735	-0.636605	0.328	0.554	1	1	0.529085
Igsf8	0.000455506	-0.629177	0.396	0.59	1	1	0.53303
2410002F23Rik	0.000462785	-0.593663	0.254	0.446	1	1	0.552301
Cox5b	0.000465933	0.514145	0.709	0.602	1	1	1.67221
Tnks2	0.000471287	-0.335968	0.061	0.181	1	1	0.714646
Ppt1	0.000478688	-0.514923	0.778	0.88	1	1	0.597547
Actg1	0.000486104	-0.397928	0.907	0.988	1	1	0.67171
Pigt	0.000501301	-0.436994	0.345	0.554	1	1	0.645976
Mmp14	0.000502181	-0.466403	0.105	0.253	1	1	0.627254
N6amt2	0.000506985	0.578871	0.218	0.048	1	1	1.78402
Wfdc6a	0.000510279	-0.682213	0.379	0.554	1	1	0.505497
Porcn	0.000510973	-0.386761	0.064	0.181	1	1	0.679254
Ggh	0.000512557	-0.50969	0.125	0.277	1	1	0.600682
Kitl	0.000521163	-0.469412	0.064	0.181	1	1	0.62537
4930451G09Rik	0.000530355	-0.383924	0.056	0.169	1	1	0.681184
Taldo1	0.000530892	0.753554	0.45	0.277	1	1	2.12454
Hsd17b10	0.000533192	0.765826	0.279	0.108	1	1	2.15077
Gstm2	0.00054287	-0.292553	0.863	0.964	1	1	0.746356
Tbca	0.000556348	0.469152	0.699	0.554	1	1	1.59864
Ufc1	0.000570603	0.751614	0.406	0.217	1	1	2.12042
Atp5h	0.000581703	0.463586	0.846	0.843	1	1	1.58976
Vdac1	0.000589623	0.733996	0.501	0.337	1	1	2.08339
Nt5c3b	0.000590224	0.715268	0.474	0.301	1	1	2.04473
Galnt1	0.000590376	-0.484727	0.144	0.301	1	1	0.615865
Dnm3	0.000591884	-0.368443	0.056	0.169	1	1	0.691811
Neo1	0.000599649	-0.410902	0.098	0.241	1	1	0.663052
Tspyl1	0.000599886	-0.554938	0.066	0.181	1	1	0.574108
Scd2	0.000603856	-0.473161	0.362	0.59	1	1	0.62303
Nt5c	0.000609297	0.688301	0.531	0.386	1	1	1.99033
Hpse	0.000626898	0.763094	0.147	0.012	1	1	2.1449
Abhd17a	0.000659384	0.711147	0.535	0.386	1	1	2.03633
Haus4	0.000664994	-0.455234	0.071	0.193	1	1	0.634299
Secisbp2l	0.000667711	-0.334677	0.064	0.181	1	1	0.715569
Ptrhd1	0.000672225	-0.503915	0.095	0.229	1	1	0.604161
Usp27x	0.000678671	-0.299236	0.027	0.108	1	1	0.741384
2010107G23Rik	0.000680221	0.732509	0.218	0.06	1	1	2.08029
Hspd1	0.000691293	-0.519489	0.264	0.458	1	1	0.594825
Snx5	0.000695704	-0.526247	0.142	0.289	1	1	0.590818
Srp9	0.00069792	0.593742	0.548	0.386	1	1	1.81075
Atp6ap1	0.000709607	-0.424466	0.147	0.313	1	1	0.654119
Psmg3	0.000727899	-0.508456	0.122	0.265	1	1	0.601423
Ddx3x	0.000733219	-0.482679	0.13	0.277	1	1	0.617128
Tcf25	0.000734907	-0.457198	0.284	0.482	1	1	0.633055
Rnf115	0.000735195	-0.484102	0.088	0.217	1	1	0.61625
Pced1b	0.000736069	-0.254835	0.027	0.108	1	1	0.775044
Rps4x	0.000736229	0.629777	0.494	0.325	1	1	1.87719
Psmb5	0.00075411	0.549499	0.628	0.542	1	1	1.73238
Ptma	0.000766112	-0.377638	0.883	0.928	1	1	0.685478
Tars	0.000776805	-0.288942	0.027	0.108	1	1	0.749056
Pdia3	0.00077701	-0.482063	0.57	0.735	1	1	0.617508
Defb45	0.000793973	-0.671156	0.802	0.867	1	1	0.511117
Mt2	0.000821493	-0.261143	0.939	0.976	1	1	0.770171
Rnaset2b	0.000823583	0.797881	0.208	0.06	1	1	2.22083
Lasp1	0.00083371	0.672976	0.252	0.084	1	1	1.96006
Twf2	0.000843185	0.680285	0.279	0.108	1	1	1.97444
Atp5g1	0.000855348	0.461185	0.809	0.711	1	1	1.58595
Rev3l	0.000862292	-0.286013	0.039	0.133	1	1	0.751253
Trim26	0.000867691	-0.415629	0.103	0.241	1	1	0.659925
Kctd13	0.000869214	0.70479	0.45	0.277	1	1	2.02342
Kdelc2	0.000869873	-0.457146	0.061	0.169	1	1	0.633088
Uxs1	0.000876607	-0.584392	0.391	0.566	1	1	0.557445
Ggct	0.000878678	-0.60604	0.1	0.229	1	1	0.545507
Rad54l2	0.000892509	-0.361278	0.034	0.12	1	1	0.696785
Cisd1	0.000899919	0.744891	0.347	0.181	1	1	2.10621
Ncapd2	0.000927936	-0.379637	0.046	0.145	1	1	0.68411
Mcfd2	0.000929195	0.687745	0.391	0.229	1	1	1.98922
Zc3h13	0.000934627	-0.376567	0.046	0.145	1	1	0.686213
Comt	0.000944391	0.759648	0.242	0.084	1	1	2.13752
Bri3bp	0.000944672	-0.446979	0.034	0.12	1	1	0.639557
Dtd2	0.000971657	0.684254	0.428	0.277	1	1	1.98229
Selt	0.000972446	-0.38929	0.291	0.506	1	1	0.677538
Jund	0.000978183	-0.562084	0.152	0.301	1	1	0.57002
Anxa2	0.000982193	-0.609008	0.511	0.651	1	1	0.54389
Aldh2	0.000988746	-0.516854	0.577	0.759	1	1	0.596394
Islr2	0.000993326	-0.386323	0.046	0.145	1	1	0.679551
Cngb1	0.00099544	-0.386557	0.059	0.169	1	1	0.679392
Rab31	0.00099854	-0.545649	0.205	0.373	1	1	0.579465
Rab4a	0.00100686	0.731997	0.298	0.133	1	1	2.07923
Mfsd10	0.00103245	-0.419463	0.054	0.157	1	1	0.6574
Retsat	0.00104459	-0.423629	0.081	0.205	1	1	0.654667
Brd9	0.00105351	-0.379303	0.054	0.157	1	1	0.684338
Mkl2	0.00105757	-0.277203	0.034	0.12	1	1	0.757901
Znhit3	0.00109947	-0.432695	0.083	0.205	1	1	0.648759
Rbbp4	0.00111303	-0.554172	0.367	0.542	1	1	0.574548
Ranbp1	0.00111417	-0.592592	0.447	0.627	1	1	0.552892
Appl2	0.00113075	-0.551707	0.203	0.361	1	1	0.575966
Nfkbia	0.00113605	-0.524084	0.34	0.53	1	1	0.592097
Calm1	0.00115004	-0.320132	0.836	0.952	1	1	0.726053
Gpr108	0.00115626	-0.389525	0.095	0.229	1	1	0.677378
Snf8	0.00115662	0.629065	0.44	0.277	1	1	1.87586
Mcee	0.00115689	-0.568002	0.196	0.349	1	1	0.566657
Lrrc73	0.00116254	-0.410573	0.042	0.133	1	1	0.66327
Gnb2	0.00118453	0.536563	0.65	0.566	1	1	1.71012
Nudt11	0.00119616	-0.373539	0.029	0.108	1	1	0.688294
Clic6	0.00120634	-0.332918	0.029	0.108	1	1	0.716829
Pla2g16	0.00122062	-0.385702	0.049	0.145	1	1	0.679973
Tmx2	0.00122619	-0.486241	0.284	0.47	1	1	0.614934
Ube2s	0.00127351	0.541581	0.67	0.59	1	1	1.71872
Sel1l	0.00129323	-0.342708	0.061	0.169	1	1	0.709846
Fbxl6	0.00131204	-0.370765	0.083	0.205	1	1	0.690206
Dip2b	0.00132621	-0.312045	0.061	0.169	1	1	0.731949
Ifngr2	0.00134138	-0.544637	0.425	0.59	1	1	0.580052
Tuba4a	0.00135755	-0.341107	0.029	0.108	1	1	0.710983
Nqo2	0.00137535	0.586337	0.112	0	1	1	1.79739
Cox7a2	0.0013859	0.462819	0.773	0.663	1	1	1.58855
Helz	0.00138792	-0.456583	0.169	0.325	1	1	0.633444
Gm10605	0.00139868	-0.384962	0.083	0.205	1	1	0.680476
Tmem123	0.00141235	-0.360123	0.056	0.157	1	1	0.69759
Slc39a13	0.0014486	-0.452	0.064	0.169	1	1	0.636354
Npc2	0.00149221	-0.321154	0.655	0.807	1	1	0.725312
Slc26a7	0.00151214	-0.358335	0.09	0.217	1	1	0.698839
Rpl17	0.00151511	0.467311	0.797	0.759	1	1	1.5957
Fbxo31	0.00153222	-0.391943	0.037	0.12	1	1	0.675743
Cdca3	0.00154399	-0.381801	0.037	0.12	1	1	0.682631
Rasd1	0.00154447	-0.437401	0.095	0.217	1	1	0.645712
Pcyt1a	0.00155966	-0.417872	0.064	0.169	1	1	0.658446
Mgst3	0.00158999	-0.67005	0.281	0.458	1	1	0.511683
Sf3a3	0.00160264	-0.37737	0.078	0.193	1	1	0.685662
Hp1bp3	0.00160929	0.625355	0.225	0.072	1	1	1.86891
Ckap2l	0.00162769	-0.255713	0.042	0.133	1	1	0.774364
Rpl38	0.00166297	0.325362	0.929	0.928	1	1	1.38453
Med16	0.00172105	-0.415542	0.044	0.133	1	1	0.659982
Ninj1	0.00173294	-0.445775	0.318	0.494	1	1	0.640328
Krcc1	0.00174891	-0.489594	0.147	0.289	1	1	0.612875
Folr1	0.00175568	0.666229	0.509	0.373	1	1	1.94688
Akr1c13	0.0017579	0.749735	0.215	0.072	1	1	2.11644
Rps6	0.00178929	0.438875	0.733	0.687	1	1	1.55096
Dact2	0.00179105	0.575295	0.108	0	1	1	1.77765
Pias4	0.00179564	-0.469479	0.112	0.241	1	1	0.625328
Cyb5r1	0.00181579	-0.485979	0.335	0.494	1	1	0.615094
Rplp1	0.00182657	0.361316	0.961	0.952	1	1	1.43522
Tyro3	0.00186972	-0.549825	0.152	0.301	1	1	0.577051
Suz12	0.00188611	-0.373162	0.044	0.133	1	1	0.688554
Prr15	0.00189249	-0.358102	0.071	0.181	1	1	0.699002
Aifm1	0.00190674	-0.372384	0.064	0.169	1	1	0.68909
Mbd3	0.00192473	-0.445115	0.196	0.361	1	1	0.640751
Serpinb6a	0.00192529	-0.544644	0.269	0.434	1	1	0.580048
Slc47a2	0.00193694	-0.45212	0.235	0.41	1	1	0.636278
Smarca5	0.00194275	0.655805	0.183	0.048	1	1	1.92669
Phax	0.0019665	-0.49306	0.164	0.313	1	1	0.610755
Mum1l1	0.00196985	-0.523771	0.279	0.458	1	1	0.592283
Usp32	0.00199593	-0.285015	0.056	0.157	1	1	0.752003
C1qbp	0.00199647	-0.487443	0.301	0.482	1	1	0.614195
Ndufb11	0.00199752	0.571248	0.582	0.434	1	1	1.77047
Plk2	0.00204294	0.576658	0.105	0	1	1	1.78008
Mif	0.00206413	-0.514708	0.738	0.819	1	1	0.597675
Ppp1ca	0.00209552	0.603333	0.491	0.349	1	1	1.8282
Hspa8	0.00209739	-0.369934	0.692	0.892	1	1	0.69078
Agpat5	0.00211164	0.768474	0.267	0.12	1	1	2.15647
Smcp	0.0021644	0.326479	0.719	0.602	1	1	1.38608
Ubl5	0.00218737	0.43334	0.795	0.663	1	1	1.5424
Samhd1	0.00219743	-0.290097	0.032	0.108	1	1	0.748191
RP23-198F11.3	0.00220268	0.625957	0.149	0.024	1	1	1.87003
Pex11a	0.0022045	-0.429749	0.088	0.205	1	1	0.650672
Gramd1a	0.00220519	-0.447039	0.132	0.265	1	1	0.639519
Stra6	0.00221545	-0.28801	0.064	0.169	1	1	0.749754
Uqcr11	0.00225856	0.475844	0.79	0.771	1	1	1.60937
Ptpn21	0.00228099	-0.375344	0.088	0.205	1	1	0.687053
Gstm4	0.00232208	-0.308715	0.032	0.108	1	1	0.73439
Gab1	0.00237745	-0.307819	0.032	0.108	1	1	0.735048
Maea	0.00238379	-0.374367	0.127	0.265	1	1	0.687725
Aamdc	0.00238469	-0.396842	0.088	0.205	1	1	0.672441
Parp1	0.00240506	-0.530143	0.188	0.337	1	1	0.588521
Cox17	0.00241238	0.547422	0.579	0.458	1	1	1.72879
Ccdc25	0.00242093	-0.428437	0.242	0.41	1	1	0.651527
Prdx4	0.0024445	-0.455209	0.428	0.627	1	1	0.634315
Ywhah	0.00248227	0.514683	0.633	0.554	1	1	1.67311
Fam188a	0.00249083	-0.55292	0.086	0.193	1	1	0.575268
Hk2	0.00249767	-0.400256	0.156	0.301	1	1	0.670148
Tox2	0.00251053	0.515892	0.149	0.024	1	1	1.67513
Rbm15b	0.00251139	-0.252253	0.032	0.108	1	1	0.777048
Commd8	0.00251875	-0.448166	0.088	0.205	1	1	0.638799
Spock2	0.00253973	-0.49578	0.208	0.373	1	1	0.609096
Pdk1	0.0026035	0.609315	0.164	0.036	1	1	1.83917
Ngfrap1	0.00263312	-0.544458	0.289	0.446	1	1	0.580156
Fam132a	0.0026512	-0.469129	0.21	0.373	1	1	0.625547
Bag2	0.00265351	-0.434549	0.203	0.361	1	1	0.647557
Nop14	0.00265567	0.551906	0.1	0	1	1	1.73656
Junb	0.00266464	-0.39874	0.073	0.181	1	1	0.671165
Dynll1	0.00269578	0.337248	0.878	0.831	1	1	1.40109
Appl1	0.0026981	-0.472749	0.108	0.229	1	1	0.623286
Sncb	0.00272124	0.461164	0.125	0.012	1	1	1.58592
Amh	0.00272158	-0.291166	0.051	0.145	1	1	0.747391
Bola2	0.00272868	0.659691	0.465	0.313	1	1	1.9342
E130308A19Rik	0.00273971	-0.251999	0.039	0.12	1	1	0.777245
G3bp2	0.00276145	0.652083	0.477	0.337	1	1	1.91953
Tmx4	0.00277793	-0.405867	0.112	0.241	1	1	0.666399
Tfpt	0.0028082	-0.40025	0.054	0.145	1	1	0.670152
Dph5	0.00281657	-0.352951	0.046	0.133	1	1	0.702612
BC003965	0.00282474	-0.557592	0.144	0.277	1	1	0.572586
Abcc1	0.00286613	-0.300275	0.088	0.205	1	1	0.740615
Arl6ip1	0.00289817	-0.496544	0.589	0.735	1	1	0.608631
Lrp10	0.00289908	-0.421861	0.227	0.386	1	1	0.655825
Fbln1	0.00290486	0.70741	0.176	0.048	1	1	2.02873
Zc3h7b	0.00290541	-0.444433	0.156	0.301	1	1	0.641188
Nacc2	0.00290659	0.491991	0.144	0.024	1	1	1.63557
Nop56	0.00292138	-0.430633	0.103	0.217	1	1	0.650097
App	0.00292251	-0.466006	0.281	0.446	1	1	0.627503
Rora	0.0029334	0.544519	0.12	0.012	1	1	1.72378
PISD	0.00299125	-0.480919	0.068	0.169	1	1	0.618215
Nhp2	0.00299642	-0.549654	0.496	0.627	1	1	0.577149
Lhfp	0.00302727	-0.343026	0.156	0.301	1	1	0.70962
Hmgcs2	0.00311013	-0.498016	0.11	0.229	1	1	0.607735
Ascc1	0.00311519	-0.398068	0.061	0.157	1	1	0.671616
Slc25a39	0.00319239	0.547461	0.262	0.108	1	1	1.72886
Atp1b3	0.00321761	-0.292299	0.205	0.373	1	1	0.746545
Ubqln2	0.00322093	-0.343331	0.137	0.277	1	1	0.709403
Rps13	0.00324782	0.428235	0.778	0.699	1	1	1.53455
Per1	0.00325693	-0.441291	0.034	0.108	1	1	0.643206
Pgam1	0.0032581	0.464436	0.653	0.554	1	1	1.59112
Ninl	0.00326145	0.592277	0.159	0.036	1	1	1.8081
Tspan5	0.00335275	-0.52669	0.188	0.337	1	1	0.590556
Agpat4	0.00341607	-0.341016	0.396	0.602	1	1	0.711048
Gstt4	0.00351698	-0.389347	0.166	0.313	1	1	0.677499
Mospd1	0.00358595	-0.346366	0.083	0.193	1	1	0.707254
Mro	0.00359934	0.633736	0.443	0.301	1	1	1.88464
Xaf1	0.00372288	-0.351541	0.042	0.12	1	1	0.703603
Dmrta1	0.00386985	-0.430444	0.071	0.169	1	1	0.65022
Tmem14c	0.00388577	0.580786	0.504	0.386	1	1	1.78744
Tacc1	0.00388812	-0.350317	0.264	0.458	1	1	0.704465
Trappc6a	0.00390186	-0.381314	0.208	0.373	1	1	0.682963
Ube2e3	0.00391648	-0.506869	0.242	0.398	1	1	0.602379
Laptm4b	0.00393206	-0.253416	0.694	0.88	1	1	0.776145
Optn	0.00396767	-0.495571	0.144	0.265	1	1	0.609223
mt-Co1	0.00397837	0.299036	1	1	1	1	1.34856
Tspan3	0.00398128	0.661063	0.416	0.265	1	1	1.93685
Ube2d1	0.00409026	0.530501	0.242	0.096	1	1	1.69978
Calm3	0.00409548	-0.434342	0.555	0.699	1	1	0.647691
Mrpl9	0.0040959	-0.297904	0.098	0.217	1	1	0.742373
Hnrnpa0	0.00409976	-0.324435	0.108	0.229	1	1	0.722936
Erf	0.00412354	-0.308076	0.042	0.12	1	1	0.734859
Gja6	0.00413162	0.68413	0.23	0.096	1	1	1.98205
Dnajb11	0.00413667	-0.317377	0.227	0.398	1	1	0.728056
Rps24	0.00418471	0.359662	0.848	0.747	1	1	1.43284
Slc11a2	0.00418971	-0.413859	0.1	0.217	1	1	0.661094
Gsta3	0.00420883	0.617153	0.171	0.048	1	1	1.85364
Nfx1	0.00422269	-0.437455	0.11	0.229	1	1	0.645678
Jade3	0.00424702	-0.355882	0.078	0.181	1	1	0.700555
Manbal	0.00425801	0.627714	0.271	0.133	1	1	1.87332
Api5	0.0042752	-0.397159	0.049	0.133	1	1	0.672227
1110051M20Rik	0.00432358	-0.334034	0.042	0.12	1	1	0.71603
Adgra3	0.00432844	-0.2783	0.054	0.145	1	1	0.75707
Tarsl2	0.0043368	0.501673	0.112	0.012	1	1	1.65148
Morf4l1	0.00433681	-0.297288	0.778	0.904	1	1	0.74283
Hsp90b1	0.00437299	-0.326534	0.658	0.795	1	1	0.72142
Pisd	0.00438642	-0.280969	0.068	0.169	1	1	0.755052
Triobp	0.00440525	0.546423	0.112	0.012	1	1	1.72706
Haus7	0.00441276	0.514745	0.396	0.241	1	1	1.67321
Ptpn1	0.00445198	-0.372982	0.134	0.265	1	1	0.688678
Cd99l2	0.0045093	-0.307973	0.076	0.181	1	1	0.734935
Birc5	0.00452534	-0.356038	0.049	0.133	1	1	0.700446
Hist1h2bc	0.00453499	-0.497326	0.377	0.542	1	1	0.608155
Asb9	0.00454806	0.506004	0.137	0.024	1	1	1.65865
Slc30a1	0.00456295	-0.258358	0.042	0.12	1	1	0.772319
Nub1	0.00464505	-0.362021	0.071	0.169	1	1	0.696268
Ubtf	0.00464671	-0.433342	0.174	0.313	1	1	0.648339
Stt3a	0.00466163	-0.258008	0.147	0.289	1	1	0.772589
Cpped1	0.00467886	-0.348409	0.056	0.145	1	1	0.70581
Fam204a	0.00468039	-0.471656	0.1	0.217	1	1	0.623968
Rragd	0.00469277	-0.41906	0.056	0.145	1	1	0.657665
Itm2c	0.00473094	-0.449346	0.655	0.759	1	1	0.638045
Ppp4r1	0.00473471	-0.357132	0.056	0.145	1	1	0.69968
Rpl14	0.00474357	0.330814	0.89	0.867	1	1	1.3921
Fryl	0.00478217	-0.276072	0.042	0.12	1	1	0.758758
Rbm28	0.00479259	-0.531119	0.088	0.193	1	1	0.587947
Pgrmc1	0.00480859	-0.544424	0.614	0.699	1	1	0.580176
Gna14	0.00482038	0.483371	0.134	0.024	1	1	1.62153
Cycs	0.00487542	0.253638	0.968	0.952	1	1	1.2887
Hacd3	0.0048914	-0.391417	0.125	0.253	1	1	0.676098
Gja1	0.00490199	-0.415689	0.308	0.47	1	1	0.659885
Mrpl18	0.00494318	0.655218	0.284	0.145	1	1	1.92556
Cited4	0.00495566	0.746647	0.286	0.157	1	1	2.10991
Cbfb	0.00496348	0.461923	0.112	0.012	1	1	1.58712
Purb	0.00503429	-0.281944	0.049	0.133	1	1	0.754316
Trim47	0.00513397	-0.413105	0.152	0.277	1	1	0.661593
Grb14	0.00514598	-0.297016	0.042	0.12	1	1	0.743032
Ankrd39	0.00517341	0.512186	0.171	0.048	1	1	1.66894
Zfp711	0.00519103	-0.377062	0.037	0.108	1	1	0.685873
Cd151	0.00527677	-0.3325	0.46	0.663	1	1	0.717129
Gpi1	0.00527811	0.552261	0.218	0.084	1	1	1.73718
Rpl6	0.00531543	0.378597	0.78	0.687	1	1	1.46024
Swi5	0.0053159	0.417191	0.672	0.566	1	1	1.51769
Cpq	0.00532183	-0.420157	0.208	0.361	1	1	0.656944
Ldhb	0.00533016	0.275372	0.961	0.976	1	1	1.31702
Cmas	0.00536051	0.522499	0.504	0.361	1	1	1.68624
Naa38	0.00537017	-0.441499	0.318	0.47	1	1	0.643072
Ccdc28a	0.00541438	-0.310851	0.134	0.265	1	1	0.732823
Chpf	0.00541809	-0.331304	0.313	0.482	1	1	0.717987
Vim	0.00543988	-0.503894	0.553	0.723	1	1	0.604173
Itgb1bp1	0.00551731	-0.490419	0.144	0.265	1	1	0.61237
Hmgb1	0.00556239	-0.479694	0.589	0.723	1	1	0.618973
Zfand5	0.00564035	-0.372237	0.181	0.325	1	1	0.689191
Gnptg	0.00564215	-0.33397	0.078	0.181	1	1	0.716075
Sdc2	0.00564857	0.592793	0.2	0.072	1	1	1.80903
Ganab	0.00575038	-0.411918	0.059	0.145	1	1	0.662378
Rcn1	0.00575288	-0.43369	0.051	0.133	1	1	0.648113
Eci2	0.00576773	0.683482	0.203	0.084	1	1	1.98076
Slc25a26	0.00584152	-0.264367	0.064	0.157	1	1	0.767692
St8sia2	0.00586122	-0.520367	0.117	0.229	1	1	0.594302
Sec61a1	0.00588781	-0.376772	0.149	0.277	1	1	0.686072
Marcksl1	0.00591381	0.319035	0.9	0.904	1	1	1.3758
Rbp1	0.005963	0.569276	0.169	0.048	1	1	1.76699
Wfdc6b	0.00596562	-0.347009	0.105	0.217	1	1	0.706799
Enpp5	0.00601153	-0.519422	0.213	0.349	1	1	0.594864
Nhsl1	0.00601397	-0.420513	0.044	0.12	1	1	0.65671
Lrrc42	0.00607914	-0.32173	0.103	0.217	1	1	0.724894
Nf2	0.00618417	-0.433615	0.09	0.193	1	1	0.648162
Dmrtc1b	0.00619449	0.518625	0.413	0.265	1	1	1.67972
Spint3	0.00619608	-0.393623	0.066	0.157	1	1	0.674608
Gca	0.0062285	0.56315	0.257	0.12	1	1	1.7562
Vdac2	0.00624174	0.442756	0.614	0.506	1	1	1.55699
Tbp	0.00626307	-0.273731	0.037	0.108	1	1	0.760537
Gsk3a	0.00629023	-0.358759	0.044	0.12	1	1	0.698543
Pfdn5	0.00632658	0.426142	0.844	0.831	1	1	1.53134
Carhsp1	0.00642834	0.567888	0.43	0.301	1	1	1.76454
Cct3	0.00648982	-0.480168	0.318	0.47	1	1	0.61868
Helt	0.00649742	0.563293	0.142	0.036	1	1	1.75645
Elp5	0.00652923	0.538033	0.396	0.253	1	1	1.71263
Cdh2	0.00655544	-0.351841	0.154	0.289	1	1	0.703392
Rps15a	0.00659556	0.380268	0.851	0.831	1	1	1.46268
Gadd45b	0.00660716	0.44962	0.127	0.024	1	1	1.56772
Tpp1	0.00661991	-0.31182	0.044	0.12	1	1	0.732113
Rnf10	0.00662484	0.503079	0.399	0.253	1	1	1.6538
Klhdc10	0.006641	-0.313383	0.044	0.12	1	1	0.73097
Kiz	0.00667897	-0.311895	0.112	0.229	1	1	0.732059
Tmem185b	0.00668369	-0.321136	0.066	0.157	1	1	0.725325
Tcp10c	0.0067176	-0.295943	0.071	0.169	1	1	0.74383
Gapdhs	0.00672174	-0.368311	0.33	0.518	1	1	0.691902
Ndufa10	0.00677484	-0.442331	0.374	0.554	1	1	0.642537
Rps26	0.00690201	0.390953	0.792	0.711	1	1	1.47839
Cmc2	0.00692221	-0.587454	0.252	0.41	1	1	0.555741
Rpl37a	0.00693093	0.307282	0.9	0.783	1	1	1.35972
Phf12	0.00696504	-0.361461	0.044	0.12	1	1	0.696658
Pcnxl4	0.00705381	-0.274563	0.044	0.12	1	1	0.759904
Gltp	0.00707608	0.475289	0.103	0.012	1	1	1.60848
Aida	0.00710293	0.512244	0.142	0.036	1	1	1.66903
Map4	0.0071242	-0.308676	0.164	0.301	1	1	0.734419
Pmpca	0.00713133	-0.367283	0.09	0.193	1	1	0.692614
Ndufa13	0.00714734	0.440713	0.685	0.614	1	1	1.55381
Ostc	0.00724938	0.528554	0.386	0.253	1	1	1.69648
Scrib	0.00725917	-0.373111	0.098	0.205	1	1	0.688589
Inha	0.00726459	0.463176	0.875	0.904	1	1	1.58911
Sart1	0.00729101	-0.505295	0.093	0.193	1	1	0.603328
Enho	0.00734005	0.511523	0.122	0.024	1	1	1.66783
Exoc3l2	0.00737426	-0.514481	0.208	0.337	1	1	0.597811
Vps26b	0.00740459	-0.266775	0.073	0.169	1	1	0.765845
Clps	0.00758735	0.567929	0.122	0.024	1	1	1.76461
Tex30	0.00759699	-0.441535	0.335	0.494	1	1	0.643048
Gba	0.00766682	-0.387519	0.108	0.217	1	1	0.678739
Wbp5	0.0076683	-0.505468	0.487	0.627	1	1	0.603223
Tpbgl	0.00767235	-0.437744	0.181	0.313	1	1	0.645491
Srsf10	0.00771105	-0.265296	0.137	0.265	1	1	0.766979
Dtnb	0.00773514	-0.448288	0.039	0.108	1	1	0.638721
Fam57b	0.00784821	-0.260105	0.051	0.133	1	1	0.770971
Ndufa7	0.0078552	0.538605	0.572	0.506	1	1	1.71362
Las1l	0.00789041	-0.417664	0.093	0.193	1	1	0.658584
Atp6v1d	0.00792603	-0.435675	0.183	0.313	1	1	0.646828
Rb1cc1	0.00797163	-0.448068	0.086	0.181	1	1	0.638861
Spg7	0.00799452	-0.474482	0.2	0.337	1	1	0.622207
Baz1a	0.00799961	-0.540528	0.125	0.241	1	1	0.58244
Rpl26	0.00801356	0.371252	0.826	0.843	1	1	1.44955
Smdt1	0.00803229	0.483539	0.589	0.506	1	1	1.6218
Pacs2	0.00804758	-0.385598	0.039	0.108	1	1	0.680044
Alox12	0.00807584	0.517326	0.1	0.012	1	1	1.67754
Mrps17	0.00807675	0.485798	0.533	0.458	1	1	1.62547
Ppt2	0.00822701	-0.39256	0.171	0.301	1	1	0.675326
Mfsd11	0.00825295	-0.380577	0.083	0.181	1	1	0.683467
Psmb1	0.00826634	0.447788	0.565	0.434	1	1	1.56485
Pik3ip1	0.00829131	-0.440439	0.196	0.325	1	1	0.643754
Tnp2	0.00829334	0.298577	0.958	0.976	1	1	1.34794
Arpc4	0.00835748	0.527914	0.562	0.482	1	1	1.69539
Gga1	0.00838831	-0.251364	0.059	0.145	1	1	0.77774
Slc30a2	0.00847306	-0.356317	0.249	0.398	1	1	0.700251
Cdc42se1	0.00848291	-0.365528	0.208	0.349	1	1	0.69383
Scoc	0.00853672	-0.303879	0.09	0.193	1	1	0.73795
Ppp1cc	0.00865371	-0.337378	0.499	0.651	1	1	0.713639
Ncor2	0.0086961	-0.308725	0.09	0.193	1	1	0.734383
Pank3	0.00871623	-0.309534	0.076	0.169	1	1	0.733789
Mlf2	0.00875156	-0.410244	0.183	0.313	1	1	0.663489
D11Wsu47e	0.00882635	-0.362166	0.054	0.133	1	1	0.696167
Chaf1b	0.00895055	0.437682	0.1	0.012	1	1	1.54911
Slc6a14	0.00898106	0.468938	0.122	0.024	1	1	1.5983
Snx7	0.00898965	0.531349	0.264	0.133	1	1	1.70123
Mgat5	0.0090029	-0.315685	0.068	0.157	1	1	0.729289
Ralbp1	0.00903277	-0.410133	0.183	0.313	1	1	0.663562
Tbcc	0.00911652	-0.322765	0.108	0.217	1	1	0.724144
Med21	0.00918599	0.498765	0.584	0.482	1	1	1.64669
Atf7ip	0.00922774	-0.331807	0.046	0.12	1	1	0.717626
Dpy30	0.00923335	0.568495	0.247	0.12	1	1	1.76561
Sumo1	0.00930553	0.504198	0.55	0.482	1	1	1.65566
1110065P20Rik	0.00940789	0.575042	0.445	0.337	1	1	1.77721
Tgif1	0.00942608	-0.352455	0.078	0.169	1	1	0.70296
Trappc3	0.00944616	-0.365459	0.147	0.265	1	1	0.693878
Glmp	0.00948626	-0.471175	0.183	0.313	1	1	0.624268
Pip4k2c	0.00953601	-0.260496	0.039	0.108	1	1	0.770669
Bloc1s1	0.00955657	0.416045	0.12	0.024	1	1	1.51595
Tmem19	0.00957441	-0.294643	0.061	0.145	1	1	0.744797
Rrs1	0.00962606	-0.304356	0.061	0.145	1	1	0.737598
1810043G02Rik	0.0096578	0.533061	0.154	0.048	1	1	1.70414
Slc25a14	0.00977701	-0.396314	0.112	0.217	1	1	0.672795
Myl6b.1	1.83319e-51	2.73829	0.831	0.108	5.13258e-47	2	15.4606
Gm14226.1	2.17312e-51	2.66726	0.771	0.078	6.0843e-47	2	14.4005
Serpina3a.1	2.40742e-51	3.19319	0.855	0.125	6.74029e-47	2	24.3661
Aqp8.1	6.90841e-49	2.76405	0.88	0.137	1.93422e-44	2	15.8639
Gsta2.1	2.08584e-48	2.51915	0.687	0.051	5.83994e-44	2	12.418
Gm37350.1	3.93303e-40	3.10794	0.819	0.178	1.10117e-35	2	22.375
Dhcr24.1	3.1649e-39	1.67246	0.446	0.01	8.86109e-35	2	5.32524
Lgals1.1	2.74495e-30	-3.69345	0.157	0.836	7.6853e-26	2	0.0248859
Igfbp7.1	5.35755e-27	1.98361	0.892	0.384	1.50001e-22	2	7.26893
Stmn1.1	1.46311e-25	1.52584	0.952	0.567	4.09642e-21	2	4.59902
Prnp.1	4.37235e-25	2.07311	0.554	0.105	1.22417e-20	2	7.94952
S100a1.1	7.28437e-25	2.72702	0.482	0.073	2.03948e-20	2	15.2872
Rhox5.1	2.9289e-24	1.88989	0.807	0.333	8.20032e-20	2	6.61861
Cdc42ep4.1	7.65452e-22	1.16631	0.325	0.022	2.14311e-17	2	3.21011
Yipf1.1	1.05329e-21	1.40343	0.759	0.232	2.94899e-17	2	4.06912
Rhox8.1	1.88101e-21	1.22334	0.988	0.883	5.26645e-17	2	3.39852
6030408B16Rik.1	1.14851e-20	1.50045	0.506	0.095	3.21559e-16	2	4.4837
1700031F05Rik.1	1.37467e-20	0.84874	0.205	0	3.8488e-16	2	2.3367
Slc26a10.1	1.52224e-20	1.02753	0.301	0.02	4.26197e-16	2	2.79417
U90926.1	2.27725e-20	1.09512	0.301	0.02	6.37585e-16	2	2.98954
Defb36.1	5.22645e-20	-1.12983	0.892	0.985	1.4633e-15	2	0.323087
Uchl1.1	1.01993e-19	-2.25943	0.12	0.692	2.8556e-15	2	0.10441
Gstm6.1	7.09871e-19	1.26622	0.855	0.435	1.9875e-14	2	3.54743
Fkbp4.1	1.21095e-18	-1.58727	0.494	0.829	3.39042e-14	2	0.204484
Chchd2.1	2.87559e-18	-0.966582	1	0.988	8.05108e-14	2	0.380381
Ttc9b.1	7.03895e-18	1.07941	0.205	0.005	1.97077e-13	2	2.94296
Ctsl.1	2.17562e-17	1.43649	0.988	0.939	6.0913e-13	2	4.20592
Gpd1.1	2.37999e-17	1.27237	0.422	0.076	6.6635e-13	2	3.5693
Acat1.1	2.88689e-17	1.18769	0.506	0.12	8.08271e-13	2	3.27951
Serpina5.1	3.65793e-17	1.50206	0.831	0.447	1.02415e-12	2	4.49093
Elovl2.1	6.35123e-17	1.23696	0.602	0.174	1.77822e-12	2	3.44512
Fxyd6.1	9.90447e-17	-1.81446	0.181	0.692	2.77305e-12	2	0.162926
Olfml3.1	1.14188e-16	1.29392	0.41	0.073	3.19704e-12	2	3.64704
Ndrg4.1	1.25707e-16	0.772596	0.193	0.005	3.51955e-12	2	2.16538
Ttyh1.1	1.2616e-16	1.27161	0.735	0.308	3.53223e-12	2	3.56659
Tpx2.1	1.35507e-16	1.33204	0.361	0.056	3.79392e-12	2	3.78877
Ndrg1.1	1.71032e-16	1.11077	0.373	0.059	4.78856e-12	2	3.03671
Hmgb3.1	2.10354e-16	1.20941	0.831	0.416	5.88951e-12	2	3.35152
Tspan17.1	2.65174e-16	-1.872	0.145	0.636	7.42435e-12	2	0.153816
Tmed3.1	2.82551e-16	1.1358	0.867	0.567	7.91086e-12	2	3.11365
Mif4gd.1	1.05052e-15	1.35591	0.518	0.142	2.94123e-11	2	3.88029
Gng8.1	4.45309e-15	1.31947	0.217	0.015	1.24678e-10	2	3.74143
Chchd10.1	5.08632e-15	-0.889278	0.928	0.973	1.42407e-10	2	0.410952
Fuca1.1	7.4958e-15	1.25377	0.904	0.677	2.09867e-10	2	3.50352
8030411F24Rik.1	8.48161e-15	-1.35916	0.506	0.804	2.37468e-10	2	0.256877
Slc25a4.1	8.8775e-15	-1.39279	0.518	0.8	2.48552e-10	2	0.248381
Ano1.1	8.97523e-15	0.856421	0.217	0.015	2.51288e-10	2	2.35472
Eppin.1	1.02618e-14	1.11311	0.916	0.575	2.87311e-10	2	3.04381
Fndc5.1	1.17321e-14	1.05891	0.602	0.186	3.28475e-10	2	2.88322
Hmgn3.1	1.51981e-14	1.24305	0.566	0.191	4.25517e-10	2	3.46618
Ivd.1	3.28976e-14	1.20421	0.349	0.068	9.21066e-10	2	3.33414
Sh2d4a.1	5.75043e-14	1.08177	0.313	0.049	1.61e-09	2	2.9499
Tmem189.1	5.88689e-14	0.978878	0.241	0.024	1.64821e-09	2	2.66147
Dpysl4.1	8.7828e-14	0.967716	0.277	0.037	2.45901e-09	2	2.63193
Gm2a.1	1.05269e-13	-1.14322	0.88	0.927	2.94733e-09	2	0.31879
Dbi.1	1.15324e-13	-1.19668	0.566	0.856	3.22885e-09	2	0.302195
Ftl1.1	1.23286e-13	1.08239	0.964	0.768	3.45177e-09	2	2.95172
Mt1.1	2.18375e-13	0.780081	1	0.956	6.11407e-09	2	2.18165
Id2.1	2.28935e-13	0.978785	0.41	0.093	6.40973e-09	2	2.66122
N4bp3.1	2.30876e-13	0.82005	0.157	0.005	6.46407e-09	2	2.27061
Ndufv3.1	5.17386e-13	-1.67463	0.253	0.631	1.44858e-08	2	0.187378
H2-K1.1	6.09073e-13	1.12366	0.663	0.289	1.70528e-08	2	3.07608
Cst9.1	7.5904e-13	0.534517	1	0.985	2.12516e-08	2	1.70662
Pbk.1	1.08771e-12	0.844182	0.337	0.064	3.04537e-08	2	2.32607
Bscl2.1	1.1414e-12	1.17449	0.578	0.21	3.19568e-08	2	3.23648
Hsd17b1.1	1.41296e-12	0.617124	0.12	0	3.95602e-08	2	1.85359
Oat.1	1.89224e-12	1.21294	0.518	0.181	5.2979e-08	2	3.36337
Amy1.1	2.19122e-12	1.00851	0.265	0.039	6.13497e-08	2	2.74151
S100b.1	2.73524e-12	0.677722	0.133	0.002	7.65812e-08	2	1.96939
Creg1.1	2.98689e-12	0.966139	0.867	0.553	8.36271e-08	2	2.62778
Myh13.1	3.25286e-12	0.567598	0.157	0.007	9.10735e-08	2	1.76403
Cdo1.1	3.63597e-12	0.984693	0.301	0.056	1.018e-07	2	2.67699
Ptgr1.1	3.67739e-12	-1.3564	0.217	0.645	1.0296e-07	2	0.257587
Camk2n2.1	3.72995e-12	0.591662	0.157	0.007	1.04431e-07	2	1.80699
Calr4.1	3.90093e-12	0.988607	0.398	0.1	1.09218e-07	2	2.68749
Corin.1	4.09346e-12	1.31784	0.422	0.122	1.14609e-07	2	3.73533
Naglu.1	4.44234e-12	1.12351	0.398	0.1	1.24377e-07	2	3.07564
Hmbs.1	5.70692e-12	1.00491	0.446	0.125	1.59782e-07	2	2.73166
Akr1b3.1	7.71423e-12	0.778305	0.952	0.834	2.15983e-07	2	2.17778
Slc22a17.1	8.30224e-12	0.950155	0.313	0.061	2.32446e-07	2	2.58611
Siva1.1	9.01735e-12	-1.56621	0.133	0.56	2.52468e-07	2	0.208835
Pfdn1.1	1.55244e-11	-1.2348	0.313	0.667	4.34653e-07	2	0.290893
Kdsr.1	2.78419e-11	0.963251	0.349	0.081	7.79516e-07	2	2.6202
Arhgap31.1	4.55865e-11	0.555553	0.145	0.007	1.27633e-06	2	1.7429
Mgarp.1	5.19334e-11	-1.45756	0.096	0.513	1.45403e-06	2	0.232805
Cox5a.1	5.51507e-11	-0.947245	0.735	0.87	1.54411e-06	2	0.387808
Serf1.1	8.94443e-11	-0.966023	0.627	0.851	2.50426e-06	2	0.380594
Shf.1	9.28962e-11	0.688558	0.169	0.015	2.60091e-06	2	1.99084
Ctsd.1	9.68593e-11	1.11	0.602	0.274	2.71187e-06	2	3.03437
Fabp5.1	1.10544e-10	1.02095	0.639	0.276	3.09502e-06	2	2.77584
Slc13a2.1	1.14911e-10	0.748992	0.169	0.015	3.21727e-06	2	2.11487
Drd4.1	1.62144e-10	1.38095	0.47	0.169	4.53972e-06	2	3.97867
Smco4.1	1.65998e-10	0.746558	0.313	0.066	4.6476e-06	2	2.10973
Mfge8.1	1.77792e-10	1.56911	0.614	0.335	4.97781e-06	2	4.80236
Aldh1a1.1	2.02692e-10	1.01433	0.747	0.421	5.67496e-06	2	2.75752
Adgrl1.1	2.27539e-10	0.850204	0.349	0.088	6.37063e-06	2	2.34012
Ppm1m.1	2.35661e-10	-1.46354	0.084	0.467	6.59803e-06	2	0.231416
Sf3b2.1	2.69722e-10	1.02793	0.482	0.171	7.55167e-06	2	2.79527
Amhr2.1	2.79003e-10	0.775254	0.976	0.895	7.81152e-06	2	2.17114
Hspb1.1	3.10065e-10	0.808084	0.964	0.77	8.68121e-06	2	2.2436
Psap.1	3.10866e-10	0.984661	0.904	0.653	8.70364e-06	2	2.67691
Pros1.1	3.12917e-10	0.934658	0.47	0.156	8.76106e-06	2	2.54634
Gpc4.1	3.42193e-10	1.14926	0.434	0.144	9.58071e-06	2	3.15587
Clic1.1	4.58183e-10	-1.00141	0.518	0.795	1.28282e-05	2	0.367361
Ly6c1.1	4.94559e-10	0.651861	0.133	0.007	1.38467e-05	2	1.91911
H2afx.1	5.62754e-10	0.835671	0.361	0.098	1.5756e-05	2	2.30636
Tmprss6.1	5.75949e-10	0.39742	0.12	0.005	1.61254e-05	2	1.48798
Itm2b.1	6.28175e-10	0.707284	0.976	0.836	1.75876e-05	2	2.02847
Maged1.1	7.28134e-10	0.886814	0.855	0.577	2.03863e-05	2	2.42738
Tmem255a.1	7.54541e-10	-1.53883	0.036	0.391	2.11256e-05	2	0.214632
Cyth2.1	7.73983e-10	0.955614	0.747	0.443	2.167e-05	2	2.60027
Fgfrl1.1	7.93792e-10	0.67002	0.157	0.015	2.22246e-05	2	1.95428
Gaa.1	8.01147e-10	0.963442	0.386	0.115	2.24305e-05	2	2.6207
1500009L16Rik.1	8.23776e-10	-1.35763	0.253	0.582	2.30641e-05	2	0.257271
Arf5.1	8.80538e-10	-0.952816	0.578	0.822	2.46533e-05	2	0.385654
Myzap.1	8.84079e-10	0.781228	0.241	0.044	2.47524e-05	2	2.18415
Htatsf1.1	9.53417e-10	1.02234	0.566	0.235	2.66938e-05	2	2.77968
Rgs2.1	1.31049e-09	0.800534	0.337	0.088	3.66912e-05	2	2.22673
Sfxn3.1	1.70546e-09	0.715713	0.349	0.093	4.77495e-05	2	2.04564
Tst.1	1.71477e-09	-1.07691	0.373	0.707	4.80101e-05	2	0.340646
Gatm.1	2.23969e-09	0.575667	0.988	0.905	6.27068e-05	2	1.77832
Ndufa6.1	2.29882e-09	-0.964797	0.59	0.768	6.43624e-05	2	0.381061
Serpini1.1	2.34813e-09	0.850008	0.337	0.09	6.57428e-05	2	2.33966
Ajuba.1	2.59299e-09	0.668469	0.265	0.056	7.25985e-05	2	1.95125
Sh3gl3.1	2.65013e-09	-1.48814	0.024	0.352	7.41984e-05	2	0.225793
Fam181b.1	3.30003e-09	0.75657	0.301	0.073	9.23941e-05	2	2.13096
BC022687.1	3.45084e-09	0.856881	0.434	0.149	9.66168e-05	2	2.3558
Maged2.1	3.58162e-09	0.875109	0.699	0.384	0.000100278	2	2.39914
Cidea.1	3.73943e-09	-1.26185	0.12	0.479	0.000104696	2	0.283129
Cldn23.1	3.90627e-09	0.557059	0.133	0.01	0.000109368	2	1.74553
Lrpap1.1	3.90906e-09	0.897381	0.699	0.391	0.000109446	2	2.45317
Slc7a4.1	3.97725e-09	0.979109	0.602	0.284	0.000111355	2	2.66208
Bik.1	4.46651e-09	-1.32364	0.072	0.413	0.000125053	2	0.266165
Nudt10.1	5.04806e-09	0.532935	0.12	0.007	0.000141336	2	1.70393
Art3.1	5.27848e-09	0.889162	0.361	0.11	0.000147787	2	2.43309
Amn.1	5.33289e-09	0.525671	0.12	0.007	0.00014931	2	1.69159
Atox1.1	5.8741e-09	-0.857328	0.723	0.853	0.000164463	2	0.424294
Med4.1	5.98587e-09	0.778862	0.458	0.159	0.000167592	2	2.17899
Dct.1	6.0244e-09	0.461562	0.108	0.005	0.000168671	2	1.58655
Cyb5a.1	6.37826e-09	-1.14173	0.361	0.648	0.000178578	2	0.319265
Mapre2.1	6.3922e-09	0.433237	0.108	0.005	0.000178969	2	1.54224
Mid1ip1.1	6.97409e-09	0.959267	0.422	0.152	0.00019526	2	2.60978
Rab30.1	7.19447e-09	0.364489	0.108	0.005	0.000201431	2	1.43978
Gm7325.1	7.33738e-09	0.545087	0.108	0.005	0.000205432	2	1.72476
Aldh1a7.1	7.48304e-09	0.415687	0.108	0.005	0.00020951	2	1.51541
Hist3h2a.1	7.59152e-09	0.675426	0.241	0.049	0.000212547	2	1.96487
Dhrs7.1	9.74239e-09	-1.28123	0.084	0.428	0.000272767	2	0.277695
Ssbp4.1	9.9138e-09	0.82571	0.349	0.105	0.000277567	2	2.2835
Slc7a6.1	1.22713e-08	0.619637	0.253	0.054	0.000343571	2	1.85825
Wfdc1.1	1.31578e-08	-1.46585	0.096	0.433	0.000368393	2	0.230881
Actn3.1	1.35111e-08	0.909778	0.253	0.059	0.000378285	2	2.48377
Clu.1	1.54214e-08	0.700947	0.988	0.941	0.000431769	2	2.01566
Calr.1	1.54226e-08	0.890024	0.88	0.692	0.000431801	2	2.43519
Rgma.1	1.66512e-08	0.644327	0.133	0.012	0.0004662	2	1.90471
Pttg1ip.1	1.927e-08	0.862001	0.675	0.381	0.000539521	2	2.36789
Kdelr2.1	2.92471e-08	-1.3981	0.157	0.477	0.000818861	2	0.247065
Mylk.1	2.98344e-08	0.798666	0.494	0.205	0.000835304	2	2.22257
Acsbg1.1	3.04586e-08	0.89141	0.651	0.369	0.000852781	2	2.43856
Svs6.1	3.39664e-08	0.517526	0.12	0.01	0.000950991	2	1.67787
Ar.1	4.03789e-08	0.487617	0.145	0.017	0.00113053	2	1.62843
1700011M02Rik.1	4.11392e-08	-0.600737	0.964	0.971	0.00115181	2	0.548407
Cited1.1	4.18147e-08	0.654023	0.928	0.797	0.00117073	2	1.92326
Sod3.1	5.30397e-08	-1.46033	0.133	0.43	0.001485	2	0.23216
Ndufa3.1	5.34302e-08	-0.812994	0.554	0.778	0.00149594	2	0.443528
Gstm1.1	5.69071e-08	0.539481	0.94	0.868	0.00159328	2	1.71512
Cd81.1	5.92229e-08	1.14632	0.771	0.555	0.00165812	2	3.1466
Myo5a.1	6.32389e-08	0.446514	0.108	0.007	0.00177056	2	1.56285
Sil1.1	7.04828e-08	0.74025	0.458	0.176	0.00197338	2	2.09646
Cmtm3.1	7.7345e-08	0.667237	0.313	0.09	0.0021655	2	1.94885
Sec62.1	8.29594e-08	0.857579	0.711	0.411	0.0023227	2	2.35745
Tmem52.1	8.66455e-08	0.968753	0.518	0.259	0.0024259	2	2.63466
H2afj.1	9.52597e-08	0.924986	0.614	0.333	0.00266708	2	2.52183
Hspa5.1	9.82413e-08	0.852459	0.795	0.57	0.00275056	2	2.34541
Galnt18.1	1.0066e-07	0.526543	0.133	0.015	0.00281828	2	1.69307
Tcn2.1	1.09851e-07	0.614932	0.205	0.042	0.00307559	2	1.84953
Hmg20b.1	1.58533e-07	-1.07301	0.337	0.584	0.00443862	2	0.341978
Fam134b.1	1.61471e-07	0.637952	0.241	0.059	0.00452087	2	1.8926
Atpif1.1	1.73069e-07	-0.659291	0.843	0.902	0.0048456	2	0.517218
Ndufs5.1	1.93399e-07	-0.865794	0.482	0.702	0.00541478	2	0.420717
Atp6ap2.1	1.9836e-07	0.834411	0.458	0.186	0.00555369	2	2.30346
Slc16a3.1	2.08552e-07	0.568466	0.12	0.012	0.00583904	2	1.76556
Efhd1.1	2.14535e-07	-1.16959	0.169	0.462	0.00600655	2	0.310493
Manf.1	2.14682e-07	-0.665547	0.795	0.914	0.00601067	2	0.513992
Mgst1.1	2.60687e-07	-1.0395	0.349	0.601	0.0072987	2	0.353632
Gnai2.1	2.75732e-07	0.735777	0.771	0.511	0.00771995	2	2.0871
Wnt6.1	2.83742e-07	0.855493	0.337	0.117	0.0079442	2	2.35253
Prdx5.1	2.95515e-07	-0.931895	0.193	0.491	0.00827383	2	0.393807
Pde4b.1	2.95815e-07	0.583233	0.181	0.034	0.00828224	2	1.79182
Gm5900.1	3.15952e-07	0.596984	0.265	0.073	0.00884603	2	1.81663
Dll3.1	3.23016e-07	0.646909	0.181	0.034	0.00904381	2	1.90963
Cks2.1	3.47401e-07	-1.22585	0.229	0.487	0.00972652	2	0.293509
Wipf3.1	3.52849e-07	0.901591	0.398	0.161	0.00987905	2	2.46352
Dixdc1.1	3.9272e-07	0.540134	0.145	0.022	0.0109954	2	1.71624
Svs5.1	3.98072e-07	0.977976	0.337	0.122	0.0111452	2	2.65907
Fam53a.1	4.43278e-07	0.812978	0.361	0.132	0.0124109	2	2.25461
Ebp.1	4.60024e-07	0.677955	0.663	0.357	0.0128797	2	1.96984
Higd1a.1	4.84755e-07	-0.978681	0.349	0.599	0.0135722	2	0.375807
Bbx.1	5.1955e-07	0.876172	0.566	0.293	0.0145464	2	2.40169
Wfdc9.1	5.50607e-07	0.785341	0.253	0.071	0.0154159	2	2.19315
Isoc2b.1	5.61661e-07	-1.37417	0.012	0.262	0.0157254	2	0.253049
Cdk5.1	5.76918e-07	-1.07934	0.277	0.523	0.0161525	2	0.33982
Hn1.1	6.41757e-07	-0.755332	0.554	0.76	0.0179679	2	0.469855
Dstn.1	7.269e-07	-0.860117	0.434	0.67	0.0203518	2	0.423113
Tom1l1.1	7.38562e-07	0.695621	0.217	0.054	0.0206783	2	2.00495
Rps6kb1.1	7.39973e-07	0.525759	0.12	0.015	0.0207178	2	1.69174
Sbk1.1	7.63817e-07	0.657476	0.265	0.078	0.0213853	2	1.92992
Ptgds.1	7.84626e-07	1.44743	0.735	0.641	0.0219679	2	4.25218
Cadm1.1	8.0921e-07	0.76675	0.675	0.408	0.0226563	2	2.15276
Myo10.1	8.1508e-07	0.718659	0.373	0.137	0.0228206	2	2.05168
1700024P16Rik.1	8.23121e-07	0.578697	0.205	0.049	0.0230458	2	1.78371
Rnpep.1	8.43888e-07	0.594337	0.229	0.059	0.0236272	2	1.81183
Myo7a.1	8.45745e-07	0.724567	0.337	0.125	0.0236792	2	2.06384
Pcsk1n.1	8.86148e-07	-0.892508	0.602	0.768	0.0248104	2	0.409627
Ssr1.1	8.93305e-07	0.665766	0.554	0.269	0.0250107	2	1.94598
Tubb3.1	9.10058e-07	-1.09156	0.325	0.584	0.0254798	2	0.335692
Dnajc9.1	9.42645e-07	0.690039	0.289	0.09	0.0263922	2	1.99379
Eef1d.1	1.08197e-06	0.710371	0.699	0.472	0.0302929	2	2.03475
Bcl7c.1	1.15396e-06	0.764379	0.265	0.081	0.0323086	2	2.14766
Echs1.1	1.20426e-06	-0.994138	0.217	0.511	0.033717	2	0.370042
Mxra7.1	1.20514e-06	-1.13578	0.036	0.286	0.0337414	2	0.321172
Qpct.1	1.26568e-06	0.628843	0.855	0.66	0.0354365	2	1.87544
Ccdc107.1	1.29413e-06	-1.16035	0.06	0.323	0.0362331	2	0.313378
Rnaset2a.1	1.31295e-06	-1.10938	0.12	0.384	0.0367601	2	0.329763
Ddah2.1	1.36296e-06	-1.15431	0.133	0.391	0.0381601	2	0.315274
Cldn11.1	1.37372e-06	0.645872	0.916	0.844	0.0384615	2	1.90765
Fut8.1	1.62335e-06	0.500167	0.193	0.044	0.0454506	2	1.649
Fam213a.1	1.62608e-06	-1.06657	0.205	0.479	0.0455271	2	0.344188
Pla2g7.1	1.83697e-06	-1.33952	0.096	0.345	0.0514316	2	0.261972
Slc29a1.1	2.00989e-06	0.588748	0.446	0.188	0.0562729	2	1.80173
Galc.1	2.05506e-06	0.284637	0.108	0.012	0.0575376	2	1.32928
Qsox1.1	2.07189e-06	0.694061	0.59	0.306	0.0580088	2	2.00183
Prss45.1	2.44467e-06	0.538902	0.12	0.017	0.0684459	2	1.71412
Cdc42.1	2.55786e-06	-0.751089	0.422	0.648	0.0716148	2	0.471853
Gm9112.1	2.71399e-06	-0.566291	0.94	0.956	0.0759863	2	0.567627
Spink8.1	2.90276e-06	0.500476	0.133	0.022	0.0812714	2	1.64951
Ccdc28b.1	2.95765e-06	-1.11491	0.157	0.408	0.0828082	2	0.327945
Ero1l.1	3.01701e-06	0.594964	0.157	0.032	0.0844702	2	1.81297
Akap12.1	3.1458e-06	0.759469	0.699	0.46	0.088076	2	2.13714
Slc9a3r1.1	3.25175e-06	-1.08186	0.06	0.306	0.0910426	2	0.338966
Pomp.1	3.2704e-06	-0.901958	0.542	0.665	0.0915645	2	0.405774
Thra.1	3.34417e-06	0.404128	0.12	0.017	0.0936301	2	1.498
Tubgcp5.1	3.432e-06	0.372177	0.12	0.017	0.0960891	2	1.45089
Epb41.1	3.43495e-06	0.468172	0.133	0.022	0.0961718	2	1.59707
Rpl13.1	3.46302e-06	-0.474432	0.964	0.966	0.0969577	2	0.622239
Jam2.1	3.48091e-06	0.73139	0.253	0.078	0.0974586	2	2.07797
Alg1.1	3.70894e-06	0.488484	0.229	0.064	0.103843	2	1.62984
Fuca2.1	3.83371e-06	0.908949	0.506	0.264	0.107336	2	2.48171
Adgrg1.1	3.94735e-06	0.762258	0.337	0.13	0.110518	2	2.14311
Cotl1.1	4.0858e-06	-1.0117	0.06	0.313	0.114394	2	0.363601
Rab3b.1	4.56601e-06	0.563034	0.229	0.066	0.127839	2	1.75599
Ndufc1.1	4.89872e-06	-0.889682	0.542	0.716	0.137154	2	0.410786
Slc26a2.1	5.02111e-06	0.544494	0.169	0.037	0.140581	2	1.72374
Ppp1r16b.1	5.17584e-06	0.55604	0.108	0.015	0.144913	2	1.74375
Wbp2.1	5.25743e-06	0.666029	0.41	0.178	0.147198	2	1.94649
Cmtm6.1	5.32156e-06	0.759884	0.41	0.186	0.148993	2	2.13803
Dusp15.1	5.44022e-06	0.651304	0.277	0.095	0.152315	2	1.91804
1600012H06Rik.1	5.77521e-06	0.537442	0.265	0.086	0.161694	2	1.71162
Pkdcc.1	6.25068e-06	0.366145	0.108	0.015	0.175007	2	1.44216
Fam122a.1	6.87864e-06	0.599126	0.12	0.02	0.192588	2	1.82053
Cdk20.1	7.24186e-06	0.358092	0.108	0.015	0.202758	2	1.4306
Ank.1	7.41198e-06	0.637503	0.181	0.046	0.20752	2	1.89175
4930502E18Rik.1	7.50849e-06	0.673978	0.253	0.083	0.210223	2	1.96203
Bex4.1	7.91845e-06	-0.610168	0.795	0.866	0.221701	2	0.543259
Rab13.1	7.96616e-06	-1.08619	0.084	0.323	0.223037	2	0.337501
Atp6v0b.1	8.1507e-06	0.717552	0.699	0.489	0.228203	2	2.04941
Lamtor3.1	8.37186e-06	0.576605	0.241	0.076	0.234395	2	1.77998
1700030K09Rik.1	8.56055e-06	0.565288	0.205	0.056	0.239678	2	1.75995
Inpp5b.1	8.83635e-06	0.625656	0.265	0.09	0.2474	2	1.86947
Rnd2.1	8.85544e-06	-1.04129	0.048	0.286	0.247935	2	0.352998
Fndc3b.1	8.85575e-06	0.500027	0.241	0.073	0.247943	2	1.64877
Gnai1.1	8.88164e-06	0.582979	0.193	0.051	0.248668	2	1.79137
Akt2.1	9.01779e-06	0.673499	0.313	0.117	0.25248	2	1.96109
Drap1.1	9.28253e-06	0.766937	0.47	0.247	0.259892	2	2.15316
Tiam1.1	9.28469e-06	0.601627	0.277	0.098	0.259953	2	1.82509
Ucp2.1	1.00426e-05	-0.80719	0.241	0.501	0.281174	2	0.44611
Ppp1r2.1	1.00466e-05	0.581194	0.663	0.374	0.281285	2	1.78817
Tuba1a.1	1.03942e-05	-0.661038	0.747	0.866	0.291017	2	0.516315
Hexa.1	1.04858e-05	0.681548	0.747	0.465	0.293583	2	1.97694
Rgcc.1	1.06046e-05	0.727848	0.41	0.193	0.296909	2	2.07062
Kcnk13.1	1.07135e-05	0.461945	0.145	0.029	0.299957	2	1.58716
Atp1a1.1	1.09271e-05	0.551094	0.687	0.401	0.305937	2	1.73515
Cpe.1	1.09645e-05	0.619499	0.735	0.447	0.306984	2	1.858
Ctnnal1.1	1.12413e-05	0.541319	0.301	0.11	0.314734	2	1.71827
Araf.1	1.16794e-05	0.496582	0.193	0.051	0.326999	2	1.6431
Gatsl3.1	1.21444e-05	-0.985704	0	0.196	0.340018	2	0.373176
Il10rb.1	1.32376e-05	0.797678	0.313	0.13	0.370628	2	2.22038
1810037I17Rik.1	1.42855e-05	-0.747463	0.578	0.721	0.399965	2	0.473566
Sptbn1.1	1.43255e-05	0.637355	0.205	0.059	0.401085	2	1.89147
Gabarapl1.1	1.49971e-05	0.573278	0.687	0.381	0.419888	2	1.77407
Ctsa.1	1.51082e-05	0.426993	0.241	0.073	0.422999	2	1.53264
Minos1.1	1.62614e-05	-0.622225	0.759	0.814	0.455288	2	0.536749
Mtap7d3.1	1.62743e-05	-1.04071	0	0.191	0.455647	2	0.353204
Epn1.1	1.6613e-05	0.650698	0.386	0.178	0.465131	2	1.91688
Sowahd.1	1.67479e-05	-0.913063	0.024	0.232	0.468907	2	0.401293
Mfsd7c.1	1.68665e-05	0.628286	0.217	0.066	0.472229	2	1.87439
Imp3.1	1.71644e-05	0.721505	0.373	0.166	0.480568	2	2.05753
Phf20.1	1.73196e-05	0.576263	0.301	0.115	0.484914	2	1.77938
Ap2m1.1	1.78157e-05	0.694854	0.602	0.369	0.498804	2	2.00342
Spint2.1	1.79354e-05	-0.632153	0.663	0.785	0.502156	2	0.531447
Erp29.1	1.84163e-05	0.704176	0.819	0.697	0.515618	2	2.02218
Cmbl.1	1.88252e-05	-0.902897	0	0.188	0.527067	2	0.405394
Ints2.1	1.89771e-05	0.604773	0.145	0.032	0.531319	2	1.83084
Aldh1b1.1	2.03786e-05	-1.03271	0.06	0.271	0.570559	2	0.356039
Sfxn1.1	2.21089e-05	-0.940755	0.036	0.244	0.619004	2	0.390333
Nsdhl.1	2.63042e-05	0.425556	0.157	0.037	0.736466	2	1.53044
Phf8.1	2.70001e-05	0.425986	0.181	0.049	0.75595	2	1.5311
Abracl.1	2.72089e-05	0.5715	0.482	0.259	0.761793	2	1.77092
Slc2a3.1	2.73162e-05	0.583349	0.361	0.154	0.764798	2	1.79203
Cgrrf1.1	2.7344e-05	0.519581	0.229	0.073	0.765578	2	1.68132
Tmem206.1	2.88069e-05	0.641346	0.349	0.152	0.806535	2	1.89903
Klhl23.1	3.07854e-05	0.619092	0.458	0.24	0.86193	2	1.85724
Dnajb9.1	3.17547e-05	0.507489	0.373	0.161	0.889068	2	1.66112
Tmem51.1	3.47938e-05	-0.899244	0.024	0.213	0.974157	2	0.406877
Tmem147.1	3.55181e-05	-0.859388	0.301	0.531	0.994436	2	0.423421
Sema3c.1	3.56936e-05	0.643599	0.241	0.083	0.99935	2	1.90332
Gnl3.1	3.65893e-05	0.568508	0.205	0.064	1	2	1.76563
Alad.1	3.69232e-05	0.707317	0.711	0.518	1	2	2.02854
Cd302.1	3.87898e-05	-0.785905	0.398	0.594	1	2	0.455707
Npr1.1	4.05248e-05	0.705288	0.325	0.139	1	2	2.02443
Zfyve27.1	4.10853e-05	0.490725	0.157	0.039	1	2	1.6335
Lamp2.1	4.15427e-05	0.615144	0.325	0.137	1	2	1.84992
Etl4.1	4.27747e-05	0.482912	0.145	0.034	1	2	1.62079
Tmed9.1	4.64856e-05	0.748703	0.602	0.394	1	2	2.11426
Casp6.1	4.6654e-05	-0.983645	0.084	0.286	1	2	0.373946
Cln5.1	4.69897e-05	0.41337	0.145	0.034	1	2	1.51191
Tmpo.1	4.94868e-05	0.451411	0.241	0.083	1	2	1.57053
Kif5b.1	5.07852e-05	0.585226	0.47	0.227	1	2	1.7954
Znfx1.1	5.13431e-05	0.455182	0.157	0.039	1	2	1.57646
Rpl39.1	5.22004e-05	-0.6336	0.723	0.802	1	2	0.530678
Fez2.1	5.24274e-05	-0.834	0.072	0.281	1	2	0.434309
Tor1b.1	5.45225e-05	0.435717	0.12	0.024	1	2	1.54607
Sphk2.1	5.53033e-05	0.59171	0.301	0.122	1	2	1.80708
Tox.1	5.62225e-05	0.386038	0.133	0.029	1	2	1.47114
Tbrg1.1	5.67692e-05	-0.908985	0.193	0.406	1	2	0.402933
1700007G11Rik.1	5.68679e-05	0.541569	0.12	0.024	1	2	1.7187
Pdzd11.1	5.72527e-05	0.543133	0.458	0.232	1	2	1.72139
Wbp1l.1	5.75648e-05	0.490051	0.205	0.064	1	2	1.6324
Atp1b2.1	5.80895e-05	0.587704	0.301	0.125	1	2	1.79985
Reps1.1	5.84781e-05	0.43281	0.133	0.029	1	2	1.54158
Lamp1.1	5.8659e-05	0.660498	0.687	0.479	1	2	1.93576
Scara5.1	6.06438e-05	0.489515	0.325	0.134	1	2	1.63153
Chit1.1	6.12039e-05	0.495103	0.12	0.024	1	2	1.64067
Sestd1.1	6.14184e-05	0.439862	0.133	0.029	1	2	1.55249
Tns3.1	6.24994e-05	0.351217	0.12	0.024	1	2	1.4208
Lmo2.1	6.37104e-05	0.486674	0.193	0.059	1	2	1.6269
Dzip3.1	6.58521e-05	0.410722	0.12	0.024	1	2	1.50791
H2-DMa.1	6.64211e-05	-0.877844	0.048	0.244	1	2	0.415678
Plp1.1	6.64728e-05	-0.912299	0.06	0.262	1	2	0.4016
Myo5b.1	7.23201e-05	0.322021	0.12	0.024	1	2	1.37991
Tgoln1.1	7.74841e-05	0.659744	0.349	0.166	1	2	1.9343
Zwint.1	7.95627e-05	0.592374	0.506	0.286	1	2	1.80828
Bop1.1	8.00109e-05	0.566308	0.301	0.125	1	2	1.76175
Utrn.1	8.43595e-05	0.458573	0.169	0.049	1	2	1.58182
Aard.1	8.43853e-05	0.308921	1	0.971	1	2	1.36195
Pycard.1	8.48164e-05	0.389544	0.157	0.042	1	2	1.47631
Galk2.1	8.62655e-05	0.481429	0.145	0.037	1	2	1.61839
Atp2b4.1	8.63618e-05	0.427037	0.205	0.066	1	2	1.53271
2700060E02Rik.1	9.02727e-05	-0.737449	0.289	0.528	1	2	0.478332
Zdhhc6.1	9.04215e-05	0.382675	0.181	0.054	1	2	1.4662
Scand1.1	9.10973e-05	-0.713756	0.458	0.65	1	2	0.489801
Noa1.1	9.58904e-05	0.359028	0.157	0.042	1	2	1.43194
Scarb1.1	9.64017e-05	-0.98233	0.169	0.369	1	2	0.374438
Pigs.1	9.65277e-05	0.541419	0.277	0.112	1	2	1.71844
Tnpo3.1	9.76357e-05	0.506841	0.181	0.056	1	2	1.66004
Zfp932.1	0.000101336	0.458859	0.169	0.049	1	2	1.58227
Rpn2.1	0.000102315	0.50373	0.663	0.433	1	2	1.65488
1700019B21Rik.1	0.000102971	-0.528798	0.578	0.844	1	2	0.589313
Acaa2.1	0.000103739	-0.913421	0.096	0.296	1	2	0.401149
Zeb2.1	0.000106849	0.474787	0.157	0.044	1	2	1.60767
Polr1d.1	0.000107126	-0.699567	0.566	0.672	1	2	0.496801
Tspan4.1	0.000114193	0.435183	0.108	0.022	1	2	1.54525
Zfp148.1	0.000114329	0.487648	0.181	0.056	1	2	1.62848
Nampt.1	0.000115401	0.572163	0.265	0.105	1	2	1.7721
Jsrp1.1	0.0001211	0.488367	0.205	0.068	1	2	1.62965
Aldh1a2.1	0.000124557	0.455206	0.12	0.027	1	2	1.5765
Gm15543.1	0.000124929	-0.858963	0.181	0.391	1	2	0.423601
Napepld.1	0.000126302	0.343966	0.193	0.061	1	2	1.41053
Atp5j.1	0.000134076	-0.548841	0.602	0.736	1	2	0.577619
Cox7c.1	0.000135266	-0.451037	0.759	0.863	1	2	0.636967
Cdc42ep5.1	0.000135999	-0.716683	0.205	0.43	1	2	0.488369
Marcks.1	0.000137489	0.793395	0.494	0.306	1	2	2.21089
Topbp1.1	0.000140114	0.385664	0.12	0.027	1	2	1.47059
Rnf111.1	0.00014149	0.30904	0.12	0.027	1	2	1.36212
2310030G06Rik.1	0.000148728	0.355304	0.108	0.022	1	2	1.42661
Rpl34.1	0.000157721	-0.536331	0.675	0.787	1	2	0.58489
Gpt2.1	0.000158885	0.492109	0.193	0.064	1	2	1.63576
Polr2e.1	0.000159651	0.519152	0.47	0.252	1	2	1.6806
Tmem59.1	0.000162242	0.595744	0.735	0.533	1	2	1.81438
Fkbp9.1	0.000163269	0.547667	0.217	0.078	1	2	1.72921
Hdgfrp3.1	0.000165122	0.319797	0.108	0.022	1	2	1.37685
Nxf3.1	0.000166027	0.417743	0.313	0.134	1	2	1.51853
Olfml2b.1	0.000168248	0.749323	0.205	0.073	1	2	2.11557
Slc39a7.1	0.000169281	0.50227	0.349	0.159	1	2	1.65247
Fstl3.1	0.00016938	-0.827495	0.048	0.232	1	2	0.437143
Slc41a3.1	0.000170006	0.544213	0.289	0.125	1	2	1.72325
Asah1.1	0.000170092	0.571863	0.41	0.218	1	2	1.77157
Shc4.1	0.000175391	0.517095	0.157	0.046	1	2	1.67715
Spsb1.1	0.000182063	0.251351	0.12	0.027	1	2	1.28576
B3gnt8.1	0.000185294	0.360079	0.145	0.039	1	2	1.43344
Cryz.1	0.00018658	-0.817516	0.048	0.222	1	2	0.441527
Serf2.1	0.000194431	-0.467229	0.867	0.895	1	2	0.626736
Hmgn5.1	0.000195335	0.715342	0.506	0.323	1	2	2.04489
Smarca4.1	0.000195586	0.542972	0.265	0.108	1	2	1.72111
Mpzl1.1	0.000197147	0.62689	0.518	0.301	1	2	1.87178
Rpl11.1	0.000198129	-0.40154	0.867	0.914	1	2	0.669289
Slc39a6.1	0.000198491	0.736605	0.361	0.178	1	2	2.08883
Rps27l.1	0.000204049	-0.608018	0.566	0.685	1	2	0.544429
Tsx.1	0.000211139	0.43193	0.952	0.888	1	2	1.54023
Txndc5.1	0.000220025	-0.830473	0.205	0.389	1	2	0.435843
Cdkn2b.1	0.000223316	0.49309	0.205	0.073	1	2	1.63737
Sod2.1	0.000227841	-0.787237	0.265	0.445	1	2	0.455101
Gas2l1.1	0.000230497	0.534366	0.651	0.416	1	2	1.70637
1810058I24Rik.1	0.000238007	-0.564835	0.759	0.802	1	2	0.568454
Nsmce4a.1	0.000239423	-0.719053	0.12	0.315	1	2	0.487213
Zfp410.1	0.000241548	0.330687	0.169	0.051	1	2	1.39192
Rbmxl1.1	0.000242246	0.4826	0.217	0.081	1	2	1.62028
Kctd12.1	0.000244041	0.468038	0.229	0.088	1	2	1.59686
Rps29.1	0.000244653	-0.334934	1	0.995	1	2	0.715385
Cox6c.1	0.000244945	-0.494018	0.843	0.912	1	2	0.61017
Tm2d3.1	0.000249102	0.324623	0.193	0.064	1	2	1.38351
Pja1.1	0.000251452	0.584763	0.446	0.24	1	2	1.79457
Rps11.1	0.000251744	-0.487424	0.892	0.883	1	2	0.614207
Nenf.1	0.000253503	0.524532	0.867	0.731	1	2	1.68967
Tsc22d1.1	0.000255913	0.537642	0.735	0.572	1	2	1.71197
Amigo2.1	0.00026208	0.446283	0.108	0.024	1	2	1.56249
Slc30a5.1	0.000267351	0.37391	0.12	0.029	1	2	1.45341
Pdia6.1	0.000270969	0.550465	0.639	0.406	1	2	1.73406
Med10.1	0.000278517	-0.472915	0.831	0.863	1	2	0.623183
Rpl32.1	0.000281957	-0.465706	0.831	0.875	1	2	0.627692
Tspan7.1	0.000282488	0.362633	0.12	0.029	1	2	1.43711
Tmem180.1	0.00029425	-0.863976	0.084	0.254	1	2	0.421483
Vsig10.1	0.000294775	0.483023	0.181	0.061	1	2	1.62097
Rnaseh2a.1	0.000295178	0.474234	0.506	0.286	1	2	1.60678
Hebp1.1	0.000297506	-0.764804	0.06	0.235	1	2	0.465425
Sptlc2.1	0.00030248	0.363922	0.169	0.054	1	2	1.43896
Gprasp2.1	0.000303471	0.520815	0.313	0.142	1	2	1.6834
Ankrd2.1	0.000304188	0.444219	0.145	0.042	1	2	1.55927
Acat2.1	0.000309114	0.438714	0.169	0.054	1	2	1.55071
Rilpl2.1	0.000309213	-0.834086	0.12	0.306	1	2	0.434271
Arl3.1	0.000309339	0.499526	0.434	0.23	1	2	1.64794
Oaz1.1	0.000311112	-0.540369	0.771	0.846	1	2	0.582533
4930455G09Rik.1	0.000318748	-0.85957	0.012	0.159	1	2	0.423344
Chpt1.1	0.000332611	-0.770879	0.024	0.176	1	2	0.462606
Psmb6.1	0.000333724	-0.566702	0.482	0.638	1	2	0.567394
Ank3.1	0.000334835	0.284005	0.108	0.024	1	2	1.32844
Man1a2.1	0.000335196	0.41142	0.205	0.073	1	2	1.50896
Klc2.1	0.000339235	0.585182	0.434	0.23	1	2	1.79532
Desi2.1	0.000340107	0.412138	0.145	0.042	1	2	1.51004
Xkr8.1	0.000343883	0.430217	0.133	0.037	1	2	1.53759
Mlec.1	0.000345163	0.549071	0.446	0.242	1	2	1.73164
Psmd2.1	0.00034834	0.405173	0.614	0.386	1	2	1.49956
Apoa2.1	0.000348483	0.790703	0.458	0.279	1	2	2.20495
Ywhab.1	0.000351003	0.422315	0.639	0.391	1	2	1.52549
Lgmn.1	0.000360865	-1.11185	0.458	0.567	1	2	0.328951
Gabarapl2.1	0.000364194	-0.599641	0.422	0.619	1	2	0.549009
Gnas.1	0.000365364	-0.491524	0.651	0.768	1	2	0.611693
Slc38a2.1	0.000366983	0.27363	0.193	0.066	1	2	1.31473
Ppp1r14b.1	0.00037085	0.437453	0.313	0.142	1	2	1.54876
Safb2.1	0.000375255	0.377754	0.169	0.054	1	2	1.459
Tnik.1	0.000375723	0.355089	0.205	0.073	1	2	1.42631
Rmnd5b.1	0.000377056	0.510302	0.373	0.183	1	2	1.66579
Zfp385a.1	0.000379268	0.555815	0.205	0.078	1	2	1.74336
Rpl31.1	0.000381168	-0.465627	0.723	0.809	1	2	0.627741
Anapc5.1	0.000381879	0.593182	0.518	0.323	1	2	1.80974
Mrpl3.1	0.000386453	0.486908	0.349	0.171	1	2	1.62728
Btd.1	0.000387812	0.49695	0.157	0.049	1	2	1.6437
Plin2.1	0.000387812	0.417386	0.157	0.049	1	2	1.51799
Fkbp5.1	0.000392132	0.38999	0.145	0.042	1	2	1.47697
Rangap1.1	0.000404844	0.434622	0.337	0.161	1	2	1.54438
Pfkl.1	0.000407562	-0.883592	0.108	0.284	1	2	0.413296
Spg20.1	0.000410161	0.451299	0.169	0.056	1	2	1.57035
Gtf2b.1	0.00041142	0.55082	0.398	0.213	1	2	1.73467
Phactr4.1	0.000420333	0.413242	0.169	0.056	1	2	1.51171
Acbd5.1	0.000432479	0.701245	0.265	0.125	1	2	2.01626
Arxes2.1	0.000438206	0.546085	0.47	0.279	1	2	1.72648
Prr3.1	0.000439681	0.385789	0.157	0.049	1	2	1.47077
Fam49b.1	0.000441637	0.614471	0.373	0.196	1	2	1.84868
Adora1.1	0.000444135	0.587248	0.325	0.161	1	2	1.79903
Lman2l.1	0.00044884	0.424259	0.12	0.032	1	2	1.52846
Pdcd4.1	0.000451887	0.570988	0.41	0.227	1	2	1.77001
Sdhb.1	0.000452735	0.636605	0.554	0.328	1	2	1.89005
Igsf8.1	0.000455506	0.629177	0.59	0.396	1	2	1.87607
2410002F23Rik.1	0.000462785	0.593663	0.446	0.254	1	2	1.81061
Cox5b.1	0.000465933	-0.514145	0.602	0.709	1	2	0.598012
Tnks2.1	0.000471287	0.335968	0.181	0.061	1	2	1.39929
Ppt1.1	0.000478688	0.514923	0.88	0.778	1	2	1.67351
Actg1.1	0.000486104	0.397928	0.988	0.907	1	2	1.48874
Pigt.1	0.000501301	0.436994	0.554	0.345	1	2	1.54805
Mmp14.1	0.000502181	0.466403	0.253	0.105	1	2	1.59425
N6amt2.1	0.000506985	-0.578871	0.048	0.218	1	2	0.560531
Wfdc6a.1	0.000510279	0.682213	0.554	0.379	1	2	1.97825
Porcn.1	0.000510973	0.386761	0.181	0.064	1	2	1.4722
Ggh.1	0.000512557	0.50969	0.277	0.125	1	2	1.66478
Kitl.1	0.000521163	0.469412	0.181	0.064	1	2	1.59905
4930451G09Rik.1	0.000530355	0.383924	0.169	0.056	1	2	1.46803
Taldo1.1	0.000530892	-0.753554	0.277	0.45	1	2	0.470691
Hsd17b10.1	0.000533192	-0.765826	0.108	0.279	1	2	0.46495
Gstm2.1	0.00054287	0.292553	0.964	0.863	1	2	1.33984
Tbca.1	0.000556348	-0.469152	0.554	0.699	1	2	0.625532
Ufc1.1	0.000570603	-0.751614	0.217	0.406	1	2	0.471605
Atp5h.1	0.000581703	-0.463586	0.843	0.846	1	2	0.629024
Vdac1.1	0.000589623	-0.733996	0.337	0.501	1	2	0.479987
Nt5c3b.1	0.000590224	-0.715268	0.301	0.474	1	2	0.489061
Galnt1.1	0.000590376	0.484727	0.301	0.144	1	2	1.62373
Dnm3.1	0.000591884	0.368443	0.169	0.056	1	2	1.44548
Neo1.1	0.000599649	0.410902	0.241	0.098	1	2	1.50818
Tspyl1.1	0.000599886	0.554938	0.181	0.066	1	2	1.74183
Scd2.1	0.000603856	0.473161	0.59	0.362	1	2	1.60506
Nt5c.1	0.000609297	-0.688301	0.386	0.531	1	2	0.502429
Hpse.1	0.000626898	-0.763094	0.012	0.147	1	2	0.466222
Abhd17a.1	0.000659384	-0.711147	0.386	0.535	1	2	0.491081
Haus4.1	0.000664994	0.455234	0.193	0.071	1	2	1.57654
Secisbp2l.1	0.000667711	0.334677	0.181	0.064	1	2	1.39749
Ptrhd1.1	0.000672225	0.503915	0.229	0.095	1	2	1.65519
Usp27x.1	0.000678671	0.299236	0.108	0.027	1	2	1.34883
2010107G23Rik.1	0.000680221	-0.732509	0.06	0.218	1	2	0.480702
Hspd1.1	0.000691293	0.519489	0.458	0.264	1	2	1.68117
Snx5.1	0.000695704	0.526247	0.289	0.142	1	2	1.69257
Srp9.1	0.00069792	-0.593742	0.386	0.548	1	2	0.552257
Atp6ap1.1	0.000709607	0.424466	0.313	0.147	1	2	1.52877
Psmg3.1	0.000727899	0.508456	0.265	0.122	1	2	1.66272
Ddx3x.1	0.000733219	0.482679	0.277	0.13	1	2	1.62041
Tcf25.1	0.000734907	0.457198	0.482	0.284	1	2	1.57964
Rnf115.1	0.000735195	0.484102	0.217	0.088	1	2	1.62272
Pced1b.1	0.000736069	0.254835	0.108	0.027	1	2	1.29025
Rps4x.1	0.000736229	-0.629777	0.325	0.494	1	2	0.532711
Psmb5.1	0.00075411	-0.549499	0.542	0.628	1	2	0.577239
Ptma.1	0.000766112	0.377638	0.928	0.883	1	2	1.45884
Tars.1	0.000776805	0.288942	0.108	0.027	1	2	1.33501
Pdia3.1	0.00077701	0.482063	0.735	0.57	1	2	1.61941
Defb45.1	0.000793973	0.671156	0.867	0.802	1	2	1.9565
Mt2.1	0.000821493	0.261143	0.976	0.939	1	2	1.29841
Rnaset2b.1	0.000823583	-0.797881	0.06	0.208	1	2	0.450282
Lasp1.1	0.00083371	-0.672976	0.084	0.252	1	2	0.510188
Twf2.1	0.000843185	-0.680285	0.108	0.279	1	2	0.506473
Atp5g1.1	0.000855348	-0.461185	0.711	0.809	1	2	0.630536
Rev3l.1	0.000862292	0.286013	0.133	0.039	1	2	1.33111
Trim26.1	0.000867691	0.415629	0.241	0.103	1	2	1.51532
Kctd13.1	0.000869214	-0.70479	0.277	0.45	1	2	0.494212
Kdelc2.1	0.000869873	0.457146	0.169	0.061	1	2	1.57956
Uxs1.1	0.000876607	0.584392	0.566	0.391	1	2	1.7939
Ggct.1	0.000878678	0.60604	0.229	0.1	1	2	1.83316
Rad54l2.1	0.000892509	0.361278	0.12	0.034	1	2	1.43516
Cisd1.1	0.000899919	-0.744891	0.181	0.347	1	2	0.474786
Ncapd2.1	0.000927936	0.379637	0.145	0.046	1	2	1.46175
Mcfd2.1	0.000929195	-0.687745	0.229	0.391	1	2	0.502708
Zc3h13.1	0.000934627	0.376567	0.145	0.046	1	2	1.45727
Comt.1	0.000944391	-0.759648	0.084	0.242	1	2	0.467831
Bri3bp.1	0.000944672	0.446979	0.12	0.034	1	2	1.56358
Dtd2.1	0.000971657	-0.684254	0.277	0.428	1	2	0.504466
Selt.1	0.000972446	0.38929	0.506	0.291	1	2	1.47593
Jund.1	0.000978183	0.562084	0.301	0.152	1	2	1.75432
Anxa2.1	0.000982193	0.609008	0.651	0.511	1	2	1.83861
Aldh2.1	0.000988746	0.516854	0.759	0.577	1	2	1.67674
Islr2.1	0.000993326	0.386323	0.145	0.046	1	2	1.47156
Cngb1.1	0.00099544	0.386557	0.169	0.059	1	2	1.4719
Rab31.1	0.00099854	0.545649	0.373	0.205	1	2	1.72573
Rab4a.1	0.00100686	-0.731997	0.133	0.298	1	2	0.480948
Mfsd10.1	0.00103245	0.419463	0.157	0.054	1	2	1.52114
Retsat.1	0.00104459	0.423629	0.205	0.081	1	2	1.52749
Brd9.1	0.00105351	0.379303	0.157	0.054	1	2	1.46127
Mkl2.1	0.00105757	0.277203	0.12	0.034	1	2	1.31943
Znhit3.1	0.00109947	0.432695	0.205	0.083	1	2	1.54141
Rbbp4.1	0.00111303	0.554172	0.542	0.367	1	2	1.7405
Ranbp1.1	0.00111417	0.592592	0.627	0.447	1	2	1.80867
Appl2.1	0.00113075	0.551707	0.361	0.203	1	2	1.73621
Nfkbia.1	0.00113605	0.524084	0.53	0.34	1	2	1.68891
Calm1.1	0.00115004	0.320132	0.952	0.836	1	2	1.37731
Gpr108.1	0.00115626	0.389525	0.229	0.095	1	2	1.47628
Snf8.1	0.00115662	-0.629065	0.277	0.44	1	2	0.53309
Mcee.1	0.00115689	0.568002	0.349	0.196	1	2	1.76474
Lrrc73.1	0.00116254	0.410573	0.133	0.042	1	2	1.50768
Gnb2.1	0.00118453	-0.536563	0.566	0.65	1	2	0.584754
Nudt11.1	0.00119616	0.373539	0.108	0.029	1	2	1.45287
Clic6.1	0.00120634	0.332918	0.108	0.029	1	2	1.39503
Pla2g16.1	0.00122062	0.385702	0.145	0.049	1	2	1.47065
Tmx2.1	0.00122619	0.486241	0.47	0.284	1	2	1.62619
Ube2s.1	0.00127351	-0.541581	0.59	0.67	1	2	0.581828
Sel1l.1	0.00129323	0.342708	0.169	0.061	1	2	1.40876
Fbxl6.1	0.00131204	0.370765	0.205	0.083	1	2	1.44884
Dip2b.1	0.00132621	0.312045	0.169	0.061	1	2	1.36622
Ifngr2.1	0.00134138	0.544637	0.59	0.425	1	2	1.72398
Tuba4a.1	0.00135755	0.341107	0.108	0.029	1	2	1.4065
Nqo2.1	0.00137535	-0.586337	0	0.112	1	2	0.556361
Cox7a2.1	0.0013859	-0.462819	0.663	0.773	1	2	0.629507
Helz.1	0.00138792	0.456583	0.325	0.169	1	2	1.57867
Gm10605.1	0.00139868	0.384962	0.205	0.083	1	2	1.46956
Tmem123.1	0.00141235	0.360123	0.157	0.056	1	2	1.43351
Slc39a13.1	0.0014486	0.452	0.169	0.064	1	2	1.57145
Npc2.1	0.00149221	0.321154	0.807	0.655	1	2	1.37872
Slc26a7.1	0.00151214	0.358335	0.217	0.09	1	2	1.43094
Rpl17.1	0.00151511	-0.467311	0.759	0.797	1	2	0.626685
Fbxo31.1	0.00153222	0.391943	0.12	0.037	1	2	1.47985
Cdca3.1	0.00154399	0.381801	0.12	0.037	1	2	1.46492
Rasd1.1	0.00154447	0.437401	0.217	0.095	1	2	1.54868
Pcyt1a.1	0.00155966	0.417872	0.169	0.064	1	2	1.51873
Mgst3.1	0.00158999	0.67005	0.458	0.281	1	2	1.95433
Sf3a3.1	0.00160264	0.37737	0.193	0.078	1	2	1.45844
Hp1bp3.1	0.00160929	-0.625355	0.072	0.225	1	2	0.535071
Ckap2l.1	0.00162769	0.255713	0.133	0.042	1	2	1.29138
Rpl38.1	0.00166297	-0.325362	0.928	0.929	1	2	0.722266
Med16.1	0.00172105	0.415542	0.133	0.044	1	2	1.51519
Ninj1.1	0.00173294	0.445775	0.494	0.318	1	2	1.5617
Krcc1.1	0.00174891	0.489594	0.289	0.147	1	2	1.63165
Folr1.1	0.00175568	-0.666229	0.373	0.509	1	2	0.513642
Akr1c13.1	0.0017579	-0.749735	0.072	0.215	1	2	0.472492
Rps6.1	0.00178929	-0.438875	0.687	0.733	1	2	0.644762
Dact2.1	0.00179105	-0.575295	0	0.108	1	2	0.562539
Pias4.1	0.00179564	0.469479	0.241	0.112	1	2	1.59916
Cyb5r1.1	0.00181579	0.485979	0.494	0.335	1	2	1.62577
Rplp1.1	0.00182657	-0.361316	0.952	0.961	1	2	0.696759
Tyro3.1	0.00186972	0.549825	0.301	0.152	1	2	1.73295
Suz12.1	0.00188611	0.373162	0.133	0.044	1	2	1.45232
Prr15.1	0.00189249	0.358102	0.181	0.071	1	2	1.43061
Aifm1.1	0.00190674	0.372384	0.169	0.064	1	2	1.45119
Mbd3.1	0.00192473	0.445115	0.361	0.196	1	2	1.56067
Serpinb6a.1	0.00192529	0.544644	0.434	0.269	1	2	1.72399
Slc47a2.1	0.00193694	0.45212	0.41	0.235	1	2	1.57164
Smarca5.1	0.00194275	-0.655805	0.048	0.183	1	2	0.519024
Phax.1	0.0019665	0.49306	0.313	0.164	1	2	1.63732
Mum1l1.1	0.00196985	0.523771	0.458	0.279	1	2	1.68838
Usp32.1	0.00199593	0.285015	0.157	0.056	1	2	1.32978
C1qbp.1	0.00199647	0.487443	0.482	0.301	1	2	1.62815
Ndufb11.1	0.00199752	-0.571248	0.434	0.582	1	2	0.56482
Plk2.1	0.00204294	-0.576658	0	0.105	1	2	0.561773
Mif.1	0.00206413	0.514708	0.819	0.738	1	2	1.67315
Ppp1ca.1	0.00209552	-0.603333	0.349	0.491	1	2	0.546986
Hspa8.1	0.00209739	0.369934	0.892	0.692	1	2	1.44764
Agpat5.1	0.00211164	-0.768474	0.12	0.267	1	2	0.46372
Smcp.1	0.0021644	-0.326479	0.602	0.719	1	2	0.72146
Ubl5.1	0.00218737	-0.43334	0.663	0.795	1	2	0.64834
Samhd1.1	0.00219743	0.290097	0.108	0.032	1	2	1.33656
RP23-198F11.3.1	0.00220268	-0.625957	0.024	0.149	1	2	0.534749
Pex11a.1	0.0022045	0.429749	0.205	0.088	1	2	1.53687
Gramd1a.1	0.00220519	0.447039	0.265	0.132	1	2	1.56368
Stra6.1	0.00221545	0.28801	0.169	0.064	1	2	1.33377
Uqcr11.1	0.00225856	-0.475844	0.771	0.79	1	2	0.62136
Ptpn21.1	0.00228099	0.375344	0.205	0.088	1	2	1.45549
Gstm4.1	0.00232208	0.308715	0.108	0.032	1	2	1.36167
Gab1.1	0.00237745	0.307819	0.108	0.032	1	2	1.36045
Maea.1	0.00238379	0.374367	0.265	0.127	1	2	1.45407
Aamdc.1	0.00238469	0.396842	0.205	0.088	1	2	1.48712
Parp1.1	0.00240506	0.530143	0.337	0.188	1	2	1.69917
Cox17.1	0.00241238	-0.547422	0.458	0.579	1	2	0.578439
Ccdc25.1	0.00242093	0.428437	0.41	0.242	1	2	1.53486
Prdx4.1	0.0024445	0.455209	0.627	0.428	1	2	1.5765
Ywhah.1	0.00248227	-0.514683	0.554	0.633	1	2	0.59769
Fam188a.1	0.00249083	0.55292	0.193	0.086	1	2	1.73832
Hk2.1	0.00249767	0.400256	0.301	0.156	1	2	1.49221
Tox2.1	0.00251053	-0.515892	0.024	0.149	1	2	0.596968
Rbm15b.1	0.00251139	0.252253	0.108	0.032	1	2	1.28692
Commd8.1	0.00251875	0.448166	0.205	0.088	1	2	1.56544
Spock2.1	0.00253973	0.49578	0.373	0.208	1	2	1.64178
Pdk1.1	0.0026035	-0.609315	0.036	0.164	1	2	0.543723
Ngfrap1.1	0.00263312	0.544458	0.446	0.289	1	2	1.72367
Fam132a.1	0.0026512	0.469129	0.373	0.21	1	2	1.5986
Bag2.1	0.00265351	0.434549	0.361	0.203	1	2	1.54427
Nop14.1	0.00265567	-0.551906	0	0.1	1	2	0.575851
Junb.1	0.00266464	0.39874	0.181	0.073	1	2	1.48995
Dynll1.1	0.00269578	-0.337248	0.831	0.878	1	2	0.713732
Appl1.1	0.0026981	0.472749	0.229	0.108	1	2	1.6044
Sncb.1	0.00272124	-0.461164	0.012	0.125	1	2	0.630549
Amh.1	0.00272158	0.291166	0.145	0.051	1	2	1.33799
Bola2.1	0.00272868	-0.659691	0.313	0.465	1	2	0.517011
E130308A19Rik.1	0.00273971	0.251999	0.12	0.039	1	2	1.2866
G3bp2.1	0.00276145	-0.652083	0.337	0.477	1	2	0.52096
Tmx4.1	0.00277793	0.405867	0.241	0.112	1	2	1.5006
Tfpt.1	0.0028082	0.40025	0.145	0.054	1	2	1.4922
Dph5.1	0.00281657	0.352951	0.133	0.046	1	2	1.42326
BC003965.1	0.00282474	0.557592	0.277	0.144	1	2	1.74646
Abcc1.1	0.00286613	0.300275	0.205	0.088	1	2	1.35023
Arl6ip1.1	0.00289817	0.496544	0.735	0.589	1	2	1.64303
Lrp10.1	0.00289908	0.421861	0.386	0.227	1	2	1.5248
Fbln1.1	0.00290486	-0.70741	0.048	0.176	1	2	0.492919
Zc3h7b.1	0.00290541	0.444433	0.301	0.156	1	2	1.5596
Nacc2.1	0.00290659	-0.491991	0.024	0.144	1	2	0.611408
Nop56.1	0.00292138	0.430633	0.217	0.103	1	2	1.53823
App.1	0.00292251	0.466006	0.446	0.281	1	2	1.59362
Rora.1	0.0029334	-0.544519	0.012	0.12	1	2	0.580121
PISD.1	0.00299125	0.480919	0.169	0.068	1	2	1.61756
Nhp2.1	0.00299642	0.549654	0.627	0.496	1	2	1.73265
Lhfp.1	0.00302727	0.343026	0.301	0.156	1	2	1.40921
Hmgcs2.1	0.00311013	0.498016	0.229	0.11	1	2	1.64545
Ascc1.1	0.00311519	0.398068	0.157	0.061	1	2	1.48895
Slc25a39.1	0.00319239	-0.547461	0.108	0.262	1	2	0.578416
Atp1b3.1	0.00321761	0.292299	0.373	0.205	1	2	1.3395
Ubqln2.1	0.00322093	0.343331	0.277	0.137	1	2	1.40964
Rps13.1	0.00324782	-0.428235	0.699	0.778	1	2	0.651658
Per1.1	0.00325693	0.441291	0.108	0.034	1	2	1.55471
Pgam1.1	0.0032581	-0.464436	0.554	0.653	1	2	0.62849
Ninl.1	0.00326145	-0.592277	0.036	0.159	1	2	0.553066
Tspan5.1	0.00335275	0.52669	0.337	0.188	1	2	1.69332
Agpat4.1	0.00341607	0.341016	0.602	0.396	1	2	1.40638
Gstt4.1	0.00351698	0.389347	0.313	0.166	1	2	1.47602
Mospd1.1	0.00358595	0.346366	0.193	0.083	1	2	1.41392
Mro.1	0.00359934	-0.633736	0.301	0.443	1	2	0.530606
Xaf1.1	0.00372288	0.351541	0.12	0.042	1	2	1.42126
Dmrta1.1	0.00386985	0.430444	0.169	0.071	1	2	1.53794
Tmem14c.1	0.00388577	-0.580786	0.386	0.504	1	2	0.559458
Tacc1.1	0.00388812	0.350317	0.458	0.264	1	2	1.41952
Trappc6a.1	0.00390186	0.381314	0.373	0.208	1	2	1.46421
Ube2e3.1	0.00391648	0.506869	0.398	0.242	1	2	1.66009
Laptm4b.1	0.00393206	0.253416	0.88	0.694	1	2	1.28842
Optn.1	0.00396767	0.495571	0.265	0.144	1	2	1.64143
mt-Co1.1	0.00397837	-0.299036	1	1	1	2	0.741533
Tspan3.1	0.00398128	-0.661063	0.265	0.416	1	2	0.516302
Ube2d1.1	0.00409026	-0.530501	0.096	0.242	1	2	0.58831
Calm3.1	0.00409548	0.434342	0.699	0.555	1	2	1.54395
Mrpl9.1	0.0040959	0.297904	0.217	0.098	1	2	1.34703
Hnrnpa0.1	0.00409976	0.324435	0.229	0.108	1	2	1.38325
Erf.1	0.00412354	0.308076	0.12	0.042	1	2	1.3608
Gja6.1	0.00413162	-0.68413	0.096	0.23	1	2	0.504529
Dnajb11.1	0.00413667	0.317377	0.398	0.227	1	2	1.37352
Rps24.1	0.00418471	-0.359662	0.747	0.848	1	2	0.697912
Slc11a2.1	0.00418971	0.413859	0.217	0.1	1	2	1.51264
Gsta3.1	0.00420883	-0.617153	0.048	0.171	1	2	0.539478
Nfx1.1	0.00422269	0.437455	0.229	0.11	1	2	1.54876
Jade3.1	0.00424702	0.355882	0.181	0.078	1	2	1.42744
Manbal.1	0.00425801	-0.627714	0.133	0.271	1	2	0.533811
Api5.1	0.0042752	0.397159	0.133	0.049	1	2	1.48759
1110051M20Rik.1	0.00432358	0.334034	0.12	0.042	1	2	1.39659
Adgra3.1	0.00432844	0.2783	0.145	0.054	1	2	1.32088
Tarsl2.1	0.0043368	-0.501673	0.012	0.112	1	2	0.605517
Morf4l1.1	0.00433681	0.297288	0.904	0.778	1	2	1.3462
Hsp90b1.1	0.00437299	0.326534	0.795	0.658	1	2	1.38616
Pisd.1	0.00438642	0.280969	0.169	0.068	1	2	1.32441
Triobp.1	0.00440525	-0.546423	0.012	0.112	1	2	0.579017
Haus7.1	0.00441276	-0.514745	0.241	0.396	1	2	0.597653
Ptpn1.1	0.00445198	0.372982	0.265	0.134	1	2	1.45206
Cd99l2.1	0.0045093	0.307973	0.181	0.076	1	2	1.36066
Birc5.1	0.00452534	0.356038	0.133	0.049	1	2	1.42766
Hist1h2bc.1	0.00453499	0.497326	0.542	0.377	1	2	1.64432
Asb9.1	0.00454806	-0.506004	0.024	0.137	1	2	0.6029
Slc30a1.1	0.00456295	0.258358	0.12	0.042	1	2	1.2948
Nub1.1	0.00464505	0.362021	0.169	0.071	1	2	1.43623
Ubtf.1	0.00464671	0.433342	0.313	0.174	1	2	1.5424
Stt3a.1	0.00466163	0.258008	0.289	0.147	1	2	1.29435
Cpped1.1	0.00467886	0.348409	0.145	0.056	1	2	1.41681
Fam204a.1	0.00468039	0.471656	0.217	0.1	1	2	1.60265
Rragd.1	0.00469277	0.41906	0.145	0.056	1	2	1.52053
Itm2c.1	0.00473094	0.449346	0.759	0.655	1	2	1.56729
Ppp4r1.1	0.00473471	0.357132	0.145	0.056	1	2	1.42922
Rpl14.1	0.00474357	-0.330814	0.867	0.89	1	2	0.718339
Fryl.1	0.00478217	0.276072	0.12	0.042	1	2	1.31794
Rbm28.1	0.00479259	0.531119	0.193	0.088	1	2	1.70083
Pgrmc1.1	0.00480859	0.544424	0.699	0.614	1	2	1.72361
Gna14.1	0.00482038	-0.483371	0.024	0.134	1	2	0.616701
Cycs.1	0.00487542	-0.253638	0.952	0.968	1	2	0.775973
Hacd3.1	0.0048914	0.391417	0.253	0.125	1	2	1.47908
Gja1.1	0.00490199	0.415689	0.47	0.308	1	2	1.51542
Mrpl18.1	0.00494318	-0.655218	0.145	0.284	1	2	0.519329
Cited4.1	0.00495566	-0.746647	0.157	0.286	1	2	0.473953
Cbfb.1	0.00496348	-0.461923	0.012	0.112	1	2	0.630071
Purb.1	0.00503429	0.281944	0.133	0.049	1	2	1.3257
Trim47.1	0.00513397	0.413105	0.277	0.152	1	2	1.5115
Grb14.1	0.00514598	0.297016	0.12	0.042	1	2	1.34584
Ankrd39.1	0.00517341	-0.512186	0.048	0.171	1	2	0.599184
Zfp711.1	0.00519103	0.377062	0.108	0.037	1	2	1.458
Cd151.1	0.00527677	0.3325	0.663	0.46	1	2	1.39445
Gpi1.1	0.00527811	-0.552261	0.084	0.218	1	2	0.575647
Rpl6.1	0.00531543	-0.378597	0.687	0.78	1	2	0.684821
Swi5.1	0.0053159	-0.417191	0.566	0.672	1	2	0.658895
Cpq.1	0.00532183	0.420157	0.361	0.208	1	2	1.5222
Ldhb.1	0.00533016	-0.275372	0.976	0.961	1	2	0.75929
Cmas.1	0.00536051	-0.522499	0.361	0.504	1	2	0.593037
Naa38.1	0.00537017	0.441499	0.47	0.318	1	2	1.55504
Ccdc28a.1	0.00541438	0.310851	0.265	0.134	1	2	1.36459
Chpf.1	0.00541809	0.331304	0.482	0.313	1	2	1.39278
Vim.1	0.00543988	0.503894	0.723	0.553	1	2	1.65515
Itgb1bp1.1	0.00551731	0.490419	0.265	0.144	1	2	1.633
Hmgb1.1	0.00556239	0.479694	0.723	0.589	1	2	1.61558
Zfand5.1	0.00564035	0.372237	0.325	0.181	1	2	1.45098
Gnptg.1	0.00564215	0.33397	0.181	0.078	1	2	1.3965
Sdc2.1	0.00564857	-0.592793	0.072	0.2	1	2	0.552781
Ganab.1	0.00575038	0.411918	0.145	0.059	1	2	1.50971
Rcn1.1	0.00575288	0.43369	0.133	0.051	1	2	1.54294
Eci2.1	0.00576773	-0.683482	0.084	0.203	1	2	0.504856
Slc25a26.1	0.00584152	0.264367	0.157	0.064	1	2	1.30261
St8sia2.1	0.00586122	0.520367	0.229	0.117	1	2	1.68265
Sec61a1.1	0.00588781	0.376772	0.277	0.149	1	2	1.45757
Marcksl1.1	0.00591381	-0.319035	0.904	0.9	1	2	0.72685
Rbp1.1	0.005963	-0.569276	0.048	0.169	1	2	0.565935
Wfdc6b.1	0.00596562	0.347009	0.217	0.105	1	2	1.41483
Enpp5.1	0.00601153	0.519422	0.349	0.213	1	2	1.68106
Nhsl1.1	0.00601397	0.420513	0.12	0.044	1	2	1.52274
Lrrc42.1	0.00607914	0.32173	0.217	0.103	1	2	1.37951
Nf2.1	0.00618417	0.433615	0.193	0.09	1	2	1.54282
Dmrtc1b.1	0.00619449	-0.518625	0.265	0.413	1	2	0.595339
Spint3.1	0.00619608	0.393623	0.157	0.066	1	2	1.48234
Gca.1	0.0062285	-0.56315	0.12	0.257	1	2	0.569413
Vdac2.1	0.00624174	-0.442756	0.506	0.614	1	2	0.642264
Tbp.1	0.00626307	0.273731	0.108	0.037	1	2	1.31486
Gsk3a.1	0.00629023	0.358759	0.12	0.044	1	2	1.43155
Pfdn5.1	0.00632658	-0.426142	0.831	0.844	1	2	0.653024
Carhsp1.1	0.00642834	-0.567888	0.301	0.43	1	2	0.566721
Cct3.1	0.00648982	0.480168	0.47	0.318	1	2	1.61635
Helt.1	0.00649742	-0.563293	0.036	0.142	1	2	0.569331
Elp5.1	0.00652923	-0.538033	0.253	0.396	1	2	0.583896
Cdh2.1	0.00655544	0.351841	0.289	0.154	1	2	1.42168
Rps15a.1	0.00659556	-0.380268	0.831	0.851	1	2	0.683678
Gadd45b.1	0.00660716	-0.44962	0.024	0.127	1	2	0.63787
Tpp1.1	0.00661991	0.31182	0.12	0.044	1	2	1.36591
Rnf10.1	0.00662484	-0.503079	0.253	0.399	1	2	0.604666
Klhdc10.1	0.006641	0.313383	0.12	0.044	1	2	1.36804
Kiz.1	0.00667897	0.311895	0.229	0.112	1	2	1.36601
Tmem185b.1	0.00668369	0.321136	0.157	0.066	1	2	1.37869
Tcp10c.1	0.0067176	0.295943	0.169	0.071	1	2	1.34439
Gapdhs.1	0.00672174	0.368311	0.518	0.33	1	2	1.44529
Ndufa10.1	0.00677484	0.442331	0.554	0.374	1	2	1.55633
Rps26.1	0.00690201	-0.390953	0.711	0.792	1	2	0.676412
Cmc2.1	0.00692221	0.587454	0.41	0.252	1	2	1.7994
Rpl37a.1	0.00693093	-0.307282	0.783	0.9	1	2	0.735443
Phf12.1	0.00696504	0.361461	0.12	0.044	1	2	1.43543
Pcnxl4.1	0.00705381	0.274563	0.12	0.044	1	2	1.31596
Gltp.1	0.00707608	-0.475289	0.012	0.103	1	2	0.621705
Aida.1	0.00710293	-0.512244	0.036	0.142	1	2	0.59915
Map4.1	0.0071242	0.308676	0.301	0.164	1	2	1.36162
Pmpca.1	0.00713133	0.367283	0.193	0.09	1	2	1.44381
Ndufa13.1	0.00714734	-0.440713	0.614	0.685	1	2	0.643577
Ostc.1	0.00724938	-0.528554	0.253	0.386	1	2	0.589457
Scrib.1	0.00725917	0.373111	0.205	0.098	1	2	1.45225
Inha.1	0.00726459	-0.463176	0.904	0.875	1	2	0.629282
Sart1.1	0.00729101	0.505295	0.193	0.093	1	2	1.65747
Enho.1	0.00734005	-0.511523	0.024	0.122	1	2	0.599582
Exoc3l2.1	0.00737426	0.514481	0.337	0.208	1	2	1.67277
Vps26b.1	0.00740459	0.266775	0.169	0.073	1	2	1.30575
Clps.1	0.00758735	-0.567929	0.024	0.122	1	2	0.566698
Tex30.1	0.00759699	0.441535	0.494	0.335	1	2	1.55509
Gba.1	0.00766682	0.387519	0.217	0.108	1	2	1.47332
Wbp5.1	0.0076683	0.505468	0.627	0.487	1	2	1.65776
Tpbgl.1	0.00767235	0.437744	0.313	0.181	1	2	1.54921
Srsf10.1	0.00771105	0.265296	0.265	0.137	1	2	1.30382
Dtnb.1	0.00773514	0.448288	0.108	0.039	1	2	1.56563
Fam57b.1	0.00784821	0.260105	0.133	0.051	1	2	1.29707
Ndufa7.1	0.0078552	-0.538605	0.506	0.572	1	2	0.583562
Las1l.1	0.00789041	0.417664	0.193	0.093	1	2	1.51841
Atp6v1d.1	0.00792603	0.435675	0.313	0.183	1	2	1.54601
Rb1cc1.1	0.00797163	0.448068	0.181	0.086	1	2	1.56529
Spg7.1	0.00799452	0.474482	0.337	0.2	1	2	1.60718
Baz1a.1	0.00799961	0.540528	0.241	0.125	1	2	1.71691
Rpl26.1	0.00801356	-0.371252	0.843	0.826	1	2	0.68987
Smdt1.1	0.00803229	-0.483539	0.506	0.589	1	2	0.616597
Pacs2.1	0.00804758	0.385598	0.108	0.039	1	2	1.47049
Alox12.1	0.00807584	-0.517326	0.012	0.1	1	2	0.596113
Mrps17.1	0.00807675	-0.485798	0.458	0.533	1	2	0.615206
Ppt2.1	0.00822701	0.39256	0.301	0.171	1	2	1.48077
Mfsd11.1	0.00825295	0.380577	0.181	0.083	1	2	1.46313
Psmb1.1	0.00826634	-0.447788	0.434	0.565	1	2	0.63904
Pik3ip1.1	0.00829131	0.440439	0.325	0.196	1	2	1.55339
Tnp2.1	0.00829334	-0.298577	0.976	0.958	1	2	0.741873
Arpc4.1	0.00835748	-0.527914	0.482	0.562	1	2	0.589834
Gga1.1	0.00838831	0.251364	0.145	0.059	1	2	1.28578
Slc30a2.1	0.00847306	0.356317	0.398	0.249	1	2	1.42806
Cdc42se1.1	0.00848291	0.365528	0.349	0.208	1	2	1.44128
Scoc.1	0.00853672	0.303879	0.193	0.09	1	2	1.35511
Ppp1cc.1	0.00865371	0.337378	0.651	0.499	1	2	1.40127
Ncor2.1	0.0086961	0.308725	0.193	0.09	1	2	1.36169
Pank3.1	0.00871623	0.309534	0.169	0.076	1	2	1.36279
Mlf2.1	0.00875156	0.410244	0.313	0.183	1	2	1.50719
D11Wsu47e.1	0.00882635	0.362166	0.133	0.054	1	2	1.43644
Chaf1b.1	0.00895055	-0.437682	0.012	0.1	1	2	0.645531
Slc6a14.1	0.00898106	-0.468938	0.024	0.122	1	2	0.625666
Snx7.1	0.00898965	-0.531349	0.133	0.264	1	2	0.587812
Mgat5.1	0.0090029	0.315685	0.157	0.068	1	2	1.3712
Ralbp1.1	0.00903277	0.410133	0.313	0.183	1	2	1.50702
Tbcc.1	0.00911652	0.322765	0.217	0.108	1	2	1.38094
Med21.1	0.00918599	-0.498765	0.482	0.584	1	2	0.60728
Atf7ip.1	0.00922774	0.331807	0.12	0.046	1	2	1.39348
Dpy30.1	0.00923335	-0.568495	0.12	0.247	1	2	0.566377
Sumo1.1	0.00930553	-0.504198	0.482	0.55	1	2	0.60399
1110065P20Rik.1	0.00940789	-0.575042	0.337	0.445	1	2	0.562681
Tgif1.1	0.00942608	0.352455	0.169	0.078	1	2	1.42256
Trappc3.1	0.00944616	0.365459	0.265	0.147	1	2	1.44118
Glmp.1	0.00948626	0.471175	0.313	0.183	1	2	1.60188
Pip4k2c.1	0.00953601	0.260496	0.108	0.039	1	2	1.29757
Bloc1s1.1	0.00955657	-0.416045	0.024	0.12	1	2	0.65965
Tmem19.1	0.00957441	0.294643	0.145	0.061	1	2	1.34265
Rrs1.1	0.00962606	0.304356	0.145	0.061	1	2	1.35575
1810043G02Rik.1	0.0096578	-0.533061	0.048	0.154	1	2	0.586806
Slc25a14.1	0.00977701	0.396314	0.217	0.112	1	2	1.48634

## Sheet: A Max
A Max
Kif27
Plcz1
Gm9059
BC055111
Pgap2
Mtap
Rsf1os1
Aldoart2
Lactb
4921536K21Rik
Fam71e1
1700013F07Rik
1700034E13Rik
Lingo1
Cacna1h
Emb
Plekhh2
Ttc4
Aph1b
Gm15612
1700019M22Rik
Knstrn
Slc41a2
Cdc34-ps
Klhl5
Slc18b1
Gm16464
Spert
Tfam
Nt5c
Ablim1
Gm16279
Arhgef39
Zmiz2
Ddi1
Ms4a14
Cdv3
Eepd1
RP23-79H24.4
Ipo5
Slain2
Fermt2
Arhgef6
Gm1840
Fam46c
Fam71f1
Sppl2c
Rai14
Dcbld2
Tox2
Bik
Zfp474
Susd1
Cdc14b
Plxna2
1700008I05Rik
Odf2
Rab3il1
Lrrc8b
Txndc2
Hmox2
1700028J19Rik
Arl8a
Herpud2
Cep63
Hipk3
Igf2bp3
Rnf24
Gm11634
Epsti1
Slc22a18
Gpd2
Spata24
Cabs1
Galntl5
Iqcf1
Sod2
Cfap97
Rora
Tmem56
Cby3
PCDHGA12
Gcnt3
Gm806
4921507P07Rik
Arl2bp
Ap2b1
Hrasls5
Rffl
Gm6960
Luzp1
Zbtb42
Morn2
Map3k6
Fam161a
Zscan21
Adcy10
Gm11981
Lin7a
Cyp2a12
Ptar1
Hyal6
Allc
Oxct2a
Hspa4l
Hook1
Pde1a
1700031M16Rik
Dock1
Spred2
4921517D22Rik
Fam131b
Xk
Dok7
Sparc
Akap4
Vars
Plxnb2
Habp4
Dnaic2
Car2
Pip5k1b
Spata7
Nqo2
B4galt6
Auh
Rap1a
Nme8
4932431P20Rik
Rnf125
C78339
Gm5334
Ccdc178
Gstcd
Afap1
Enpp1
Gpi1
Ubqlnl
Ptpn13
Ttc7b
Prss55
Ccdc101
4930557A04Rik
Stag2
A730017C20Rik
C030037D09Rik
Ncmap
Rgsl1
Lmbrd2
Gm7236
4933411K16Rik
Vat1
Mea1
Bag5
1700001K19Rik
Tex35
Cnst
Fam166a
1700001C19Rik
Pcmt1
Hsf5
1700027A15Rik
Gda
Phf21b
Jag1
Pla2g5
Gm13539
4921513I03Rik
1700017D01Rik
Hmgb4
Cdk5
Gca
Tmem53
Mxra7
Tex37
Wasf2
Asb17
Camsap1
Tmem51
CK137956
Abhd16b
Ctnna3
Slc12a7
Lkaaear1
Mest
1700126A01Rik
Gm16150
Hspa1l
Tcp11
BC100451
Ubqln3
Gsg2
Tollip
Efhd1
Spatc1
Gstt4
Epb4.1l3
Mgst1
Fam219b
Pcbp3
Itpr2
Cntnap5b
Kctd16
Zbbx
Soat1
1700110K17Rik
Fam227a
Hspb7
Sh3glb1
Grip1
Tpd52l1
Nup62
Spata33
Gmpr
Ifngr1
Endod1
Msrb3
Mapk13
Fut10
Ms4a5
Gm4907
4930448K20Rik
Gm2a
Atp8b3
Itpkb
Etv5
Lrp1
Efcab6
St3gal2
Prkar2a
Gpm6b
4922502D21Rik
Cdca2
Sytl4
4930503B20Rik
BC049635
Cstl1
Plp1
Spry1
6030419C18Rik
RP23-114N1.4
Fkbp4
Fam71f2
Spz1
Clmn
Actg2
Pdzd2
Alox12
Clip4
Pdk1
Rab4a
Tctex1d1
Vsig1
Cpeb3
Gna14
Nup153
Gm10638
Nek6
Tex13a
Mtus1
Slc22a21
Chn2
Fnbp1
Sowahd
Rnf133
Dock8
Aifm2
Ttc9
1700084M14Rik
Itgae
Kdm4d
Gm4772
Pbp2
Dscaml1
H1fnt
2810408A11Rik
Aqp11
Tmem180
Papolb
Ndst1
Aif1
Akr1c13
Cdc34
4933402J07Rik
Lrrc57
Proca1
Cdkl3
Kndc1
Acadl
Tcp10b
Dcbld1
Col4a4
Ccdc50
Usp43
Chdh
1700029B22Rik
Alms1
Cep57
Ngfr
Anxa13
4933413G19Rik
Ifitm7
Stk26
Tsacc
Sall3
Pla2r1
4933400C23Rik
Rnd2
Zmym3
8430419L09Rik
Elmo1
Pygb
Pabpc2
Pygl
Ccsap
Ccdc38
Syap1
Bpifa3
Ppp2r5e
Cep112
Usp12
Gm5132
4933402N03Rik
4930435E12Rik
Ccno
Gm14857
Arg1
D6Ertd474e
Lpo
Gsdma
Mgrn1
Tarsl2
Gna13
Asns
1700001O22Rik
Bzw1
Agpat2
Tuba4a
Rasa3
Jazf1
Slc30a4
Armc12
Nup98
Fbxw10
Fam129a
Tgm2
4931414P19Rik
Helt
Myb
Nkx2-4
Spata18
Dpysl3
Vash2
Sh3gl3
1700019B21Rik
Pdzd8
Mlf1
1700080E11Rik
Rap1gap2
Ankrd53
Lppr5
Pip4k2a
Rnf112
Cystm1
D830044I16Rik
Spata19
Rap1b
Cdc14a
Tcte1
Agpat5
Aldh1a3
Rnf138
Tpmt
AF366264
Cmtm1
Tssk2
9430020K01Rik
Fam187b
Arhgap18
Pls3
Leprel4
A530016L24Rik
Tmod4
Samd4
Skp2
Abhd5
Dusp6
Ide
BC049715
Olig1
Tmem263
2010107G23Rik
2021-09-11
Gm6812
Cytip
Gm498
Midn
Anp32a
Rfk
Dynlt3
Gm16226
1700001C02Rik
Sema6a
Kcnmb4os1
Gm1661
Casp6
Sh3rf2
Fez2
Fscb
Fam84b
Iqcf5
Znrd1as
Adap1
Xrra1
Kif2c
Rcan1
Mroh7
Slco3a1
1700019B03Rik
Filip1
1700125H03Rik
4930486I03Rik
Abca17
Tmem255a
Gm15800
Usp44
4930469G21Rik
Shisa5
Aqp9
Lgals1
Slc25a4
Mtap7d3
Dgka
Gm5893
Prkcd
Papd5
Lrrc74a
Pom121l2
Izumo2
Mroh2b
Iqsec2
Gm6657
Akr1c12
Rerg
Nsun7
Zc3hav1
Pwwp2b
Rab11fip5
Sqrdl
3110035E14Rik
Sdccag3
Adcy2
Cdr2l
Ngly1
Vwa3a
Arl9
Rfx3
BC061195
Spata6
1110017D15Rik
Rilpl2
Ppfibp2
1700109G14Rik
Fscn3
4930571K23Rik
Syt7
Hip1
Rbm28
Smarcc2
Dnajb8
Dgkh
Cog6
Pkdrej
Mtus2
Ppp1r2-ps7
Plac1
Yod1
Naalad2
4933400A11Rik
Herpud1
Tmem135
Cst8
Klk1b8
Ppp2r2b
9330171B17Rik
Msx2
Nrd1
1700022A21Rik
Elovl5
Snx7
Mbp
Gm15491
Fam229b
Bfsp1
Hypm
Ston1
4930549C01Rik
Ube2j1
Mllt11
Iqcf3
Slc25a23
Golm1
Prdx4
1700012L04Rik
Tnp2
Actrt2
Ptgr1
Csnk2b
Prss58
Eps8
Stat4
Dram1
Art5
1700010D01Rik
Ica1l
Fam213a
Pgbd5
Rasl2-9
8030411F24Rik
Rp2h
Psmf1
Agpat3
Hipk1
Ddah1
Tango6
Rnf222
1700024P04Rik
Fabp12
Exoc6
1700003E24Rik
Gm3880
Plin5
Mical3
Txndc5
Fem1b
Tspan6
Slc26a8
Prkar2b
Prm2
Nbr1
Sgk3
Rnf19a
Mcph1
Isoc2b
Zfp354a
1700034G24Rik
Sh3tc2
Mtfr1
Osgin1
Spata32
Cyp2d22
Hyls1
St3gal1
Ppapdc3
Prss42
Gas2l3
Lasp1
Dnajb3
Lima1
Pxk
Unc5a
Spata31d1a
1700003F12Rik
Ankrd35
Fam20a
Gm11608
4931431C16Rik
Mgat4b
Lipe
2021-03-10
Gdpd1
Ccdc69
Cdrt4
Gsg1
Tst
Pmfbp1
1500009L16Rik
Morn3
Acsl4
Dnajc5b
Chst2
Tescl
Tada2b
Slc16a14
Ctag2
Tnfsf12
Mcf2
Eva1c
Fkbp14
1700016P04Rik
Nrcam
Reps2
Slfnl1
Slc9a3r1
Lhfpl2
Mmgt2
Grin2b
Izumo3
4430402I18Rik
Sec23a
Slc9a2
Rab13
Lrp3
Gas6
Phf7
Epas1
Capza3
Noxred1
Lrrc75a
Lrrc51
Ankrd60
Rnf150
1700019D03Rik
Ccdc54
Cd302
Tcp10c
Ptpn9
Dcps
Zdhhc2
D10Wsu102e
Jam3
Comt
Fbxl14
Msl3
RP24-276N7.2
Diras2
1700029H14Rik
Car11
Toporsl
Rbm4b
1700009N14Rik
1700039E15Rik
2021-09-14
Hdhd1a
Spry4
4930505A04Rik
Mxra8
Shc2
Folr1
Tmco5
Prkcq
Mylk3
Plekho1
Gbas
4930589P08Rik
1700026D08Rik
Gatsl3
Gm4875
Ica1
Prss40
4930584F24Rik
4933402P03Rik
Slc25a13
Garnl3
Atl3
Cylc2
Csnka2ip
Lrrk2
Ddx52
Syk
Dpysl5
Setd8
Cep85l
Fam71d
Lrrc27
Actrt1
Slc15a1
Tnp1
Clic1
Sfxn1
Me3
Slc34a2
Gm5941
Fam217a
Atp1a4
4932418E24Rik
Adam3
1700011H14Rik

## Sheet: B Max
B Max
Nrarp
Nsun4
Dtx3
Pappa
Map6d1
Dydc1
Tns1
Ppm1j
Plekhf1
Fam154aos
Dydc2
Zdhhc9
Chst10
Zcchc13
Prr30
Paqr5
1700015G11Rik
Iqca
Actl11
Sort1
Dyrk1b
Dlgap1
Aff3
Klk1b9
Otub2
Svip
Ndrg3
1700042G07Rik
Foxq1
Vasp
Hebp1
Pxt1
Spata20
Arc
Zmynd15
Med26
Incenp
Ppp1r3c
Myh1
Ovol2
Reep2
Gprc5b
Ggn
Tbl1x
Cd59a
Ctxn1
Slc2a8
Slc25a37
Fam46b
Ugcg
Zfp646
Tbp
Tshz2
Dennd4b
Pga5
Spen
Aurka
Fam186b
Ccnf
Rilpl1
Fa2h
Crabp1
1700020A23Rik
1700020N15Rik
2010109I03Rik
Klk1b3
Tmem151a
Exoc6b
Fbxo17
4930544D05Rik
Ophn1
Lin28a
Irf8
Espn
Pcsk6
Ccnb1
Gm6583
Gapdhs
4930538K18Rik
Rasd1
Ttc24
Irf2bpl
Ttll10
Pomt2
Ccdc33
4930590J08Rik
Gm6760
Prm3
Ldlrap1
Prelp
Camk2n1
Cd34
Spata21
Spem1
Pacrg
Bahcc1
Znrf4
Gnpda1
Kit
Akap1
Foxm1
Soga1
Il17re
Fam134b
1700016H13Rik
1700096J18Rik
Iffo1
Lama5
4930442L01Rik
Sox17
Pgam2
Lrrc28
Cdca3
Efcab8
Aldh9a1
Rhpn2
Smagp
Dab2ip
1700120K04Rik
Tex19.1
Oxct2b
Stk35
Rnf38
Smim23
Rusc2
Plk1
Ccna1
Elfn1
Odf4
Wasf1
Ptpre
Sh3bgrl3
Plekha4
4930433I11Rik
Gm4665
Mex3d
Spata3
C130074G19Rik
Map3k9
Plekhm2
Ttyh3
Klf16
Zfp704
Lrrc18
Lelp1
Reln
Defb33
1700067K01Rik
Gm4871
Rhcg
Wnt3
Fam105a
Reep6
Wnk4
Pard3b
Sh3rf1
Arid5b
Ace
Rgs17
5730559C18Rik
Aldh3b2
Chd7
H2afb1
Alas2
Phkg2
Gjb3
Itga6
Isg20l2
BC048671
Rfx8
Fam132a
Slc16a4
Plce1
Myo6
Vwa3b
Adpgk
Gm15756
1700018C11Rik
Zc2hc1c
Brpf3
Pkib
Epb4.1l4b
Pag1
AI507597
Zfp574
Tssk3
Mapk8ip2
Prss21
Prm1
Peli2
1700013G24Rik
Ttc39d
Lpp
Kif18b
Tepp
1700008P02Rik
Ptprf
Atxn7l1
2610318N02Rik
Tprn
Hsd17b10
Cit
Glb1l3
Gga2
Glul
Sft2d2
3110070M22Rik
Prkcb
Erbb2
Gm5901
Prss39
Sox12
Lpcat3
Usp50
St6galnac2
Mast2
Ncor2
Fads1
1700034J05Rik
Itpr3os
Nt5c1b
D7Ertd443e
6820408C15Rik
Tcf7
Adamtsl5
Sntg2
Stat3
Jph3
1700029F12Rik
Mypop

## Sheet: C Max
C Max
Prss46
Cep72
Jsrp1
Fam186a
Galnt6
Ccdc184
Slc6a6
Far2
Dos
Rab31
Als2cl
Zan
Smim1
Tmem189
Kcnt1
Hdc
Wnt6
Adarb1
Mcam
Tdrd6
Lphn1
Ykt6
Hmgn5
Adck3
Rsbn1
Fam109b
Efcab12
Papss2
2700094K13Rik
Gml
Fkbp5
Ptpn7
Nck2
N4bp3
Kank2
Fsip2
Nkpd1
Ubash3b
Pla2g16
Metrnl
Nat14
Gnai2
Rpsa
Cyb561
Kif9
Igfbp7
Radil
Aldh1a7
Svil
Padi2
Prkx
Map1a
Gpr161
Adora1
Dynll2
Myl6b
Pde4a
Pkdcc
Gm15564
Ly6c1
Jdp2
Calm3
Slc25a10
Pafah2
Gm20611
Pxdn
Arhgef25
Dcakd
6030408B16Rik
Flna
Pfkp
Gm715
Camk2n2
Kctd15
Fancd2os
Tpx2
Stk11
Rnf220
Tfeb
Cfap58
Sash1
4921501E09Rik
Chst5
Ccdc166
Rftn1
Pdzd7
Daam2
Mtch1
Stmn1
Dip2b
Cand1
Ptk7
U90926
Anxa4
1700001F09Rik
Pif1
Fam184b
4930432E11Rik
Vwa7
1700123K08Rik
Gmip
Gm14226
Ninj1
Foxj1
Ak1
Ldb1
Fsip1
Zdhhc11
Lurap1
Gstt2
Adam15
1700041C23Rik
Maged2
Hk2
Dnm3
Rab3b
Plac8l1
Ccdc89
Rpa2
Tpm1
Ftmt
Lrrk1
D930048N14Rik
Gcat
Inf2
Gpd1
Ptprv
Mmp14
Ftl1
Cfap52
Morc2b
Limch1
Samd1
Zfp629
1700029J07Rik
Gm6588
Itm2c
Cd99l2
Fgfr1
Efhb
Cbx2
Tssk5
Cdca7
Fth1
Arhgap31
Cul7
Mmd
4930562C15Rik
Gm14891
6430548M08Rik
1700037H04Rik
Slc29a1
Gramd3
Cyth1
Wdr33
Noa1
Smpd3
Id2
4933404O12Rik
Polr2l
Dapp1
Plcb4
6330416G13Rik
Tcf7l1
Fam83f
Kctd14
Sfxn3
Cercam
Tnfrsf1a
Ctnna2
Prr22
Piwil2
Zfhx2
Klf15
Slc40a1
Rps2
Rrp9
Kif22
Slc25a30
Trip13
Tnip1
Arid3a
Ppp1r14b
Zscan2
Ncdn
Mir6236
Gsta1
Col6a4
Mcm3
Ceacam3
Hpgd
Espl1
Tubgcp5
Nutm1
Acat3
Zfp39
Tmem171
Gm16861
Cpped1
Bok
Marveld1
Frmd4a
Nudt10
Pdgfra
Gstm6
Zwint
Nol6
Stard8
Avpi1
Wdr90
Mief2
1700011A15Rik
Sptbn2
Aqp8
Ncapd2
BC061194
Tnrc18
Ngfrap1
Csrp1
1700020L24Rik
Actl10
Nudt11
Il31
Pak6
Lrriq4
Fndc5
Hipk4
Mif4gd
Stxbp1
Tmem52
C1ql1
Evpl
Pitpnm2
Tmem38b
Slc13a2
Fam181b
Homez
Nfkb2
Pdlim4
Zbtb8a
1700001J11Rik
6330419J24Rik
4933405O20Rik
Vmac
Prr5l
Elovl3
Col4a1
Dyrk3
Scx
Ephb4
Mical2
Dpysl4
Cited1
Slc41a3
Ptk2b
Nagpa
Zfp608
Polr2e
Wdr54
Tmprss5
Slc22a17
Myo1d
Fabp5
Rasal1
Impdh2
Lrrc42
Plekhg4
Xylt1
Angel1
Hmbs
Gabbr1
Iqcf4
Nat6
Fer1l5
Cachd1
Dysf
Galk1
Tekt2
4930579F01Rik
Kif1c
Tex38
Tmem81
Dnah10
Rufy4
Ctnnd2
H2afx
Bricd5
Nme4
Gm4234
Icam5
Serpina3b
Ffar4
Aldh1a1
Lmo2
Tekt4
Noc2l
Akt2-ps
Wdr81
Trnp1
Kcnk13
Vgll1
Ankrd2
Cmtm3
Mdm1
Adam8
Bcl7c
Wdr78
Nbeal2
Ccdc105
Gsta2
Yipf1
Spsb1
Fyb
Haus8
A930018P22Rik
Mansc4
Nxf7
Lrp5
Lrrc4
1700016G14Rik
Dsg1a
Card10
Cspg5
Zswim5
Rbms1
Plcl2
Fam53a
Atp2b3
Cad
Tesk2
1700024P16Rik
Sh2d4a
Ddit4l
Bax
Slc26a10
Znrf1
Tmprss13
Hpcal4
Hmgb3
Islr2
Kdf1
Cyp26b1
Sipa1l1
Sox13
Gm11223
Zc3h7b
Tmie
Sorbs1
Rasgrf2
Uap1l1
Mcm2
Alg13
Cntnap1
Tmcc2
Surf6
Mtr
1700067P10Rik
Prr27
Hsd3b1
Shf
Sbk1
Arhgef37
Fpgs
Akt2
Srl
Sphk2
Cttn
Bcr
Atp10a
Csnk1e
Pold1
Cic
Ctnna1
Ccnd1
Plcb3
C77080
Ptpdc1
Tmem101
Fuca1
Col1a1

## Sheet: D Max
D Max
Rhox13
BC051226
Apol7a
Hsdl1
Akap14
4930527J03Rik
Atp4a
Wfdc9
Men1
Nrep
Galc
Rapgef5
Snx32
Sart3
Lzts3
Ms4a18
Hephl1
Vstm4
Tmtc2
Entpd1
Mtfp1
Kcnd3
Homer3
A430078G23Rik
Cyp11a1
Gm5424
Piwil1
Rnf7
Zfyve27
Smad3
Lrrc61
Cabp1
Bcl9l
Slc16a3
C1qtnf6
Ush1g
Svs5
Akr1cl
Ccdc37
4921528I07Rik
Gm4969
Ryr2
AW047730
Mlph
Col18a1
Capn10
Stom
Arrb1
Tns3
B4galt7
Thra
Ntn4
Epb4.1
Htra3
Tmem190
Eml3
Clstn1
Rbbp4
Sfi1
Nabp1
Slc52a2
Fgfrl1
Spata31d1d
Apcdd1
Stard9
Sptbn5
Ephb2
Neat1
4930579G24Rik
Tas1r1
Igfbp3
4632428N05Rik
Gfpt2
Lmcd1
Ptprh
Actn3
Rabl6
Tmem110
Gpsm1
Arhgef3
Sox5
Bbx
Kif2b
Pxmp2
Hlcs
Ankrd33b
Plekhg2
Ap1s2
Rab30
Tppp3
Hsd17b1
Pax2
Vgll3
Smim6
Spaca5
Pfdn1
Cdkn1a
Wfdc1
Mgll
Abtb2
Cyth3
Chst1
Fbxo24
Wnk3
Atp11b
Mxd1
Sult4a1
Stard5
Abca2
P2ry2
Mpeg1
Spaca3
B3gnt8
Gnb5
Tex36
Ampd3
Insc
Otof
Ptgds
Chp2
Hdac5
Pfkfb4
Htatsf1
Tmem221
Cmc2
Jag2
Spaca4
Akap9
Slc36a3
Kif5c
Zscan5b
BC034090
Dnah9
Col28a1
Tiam1
Gramd1a
Shc4
Rhob
Taok3
Mmel1
Mapre2
Rasl10b
Dixdc1
Pnmal1
1700013D24Rik
Ptprk
Bdh1
Srgn
Hs6st2
Lgals7
Zbtb8b
Vasn
Brsk1
Rnpep
Sart1
Amotl1
Tbc1d9b
BC051628
Ccdc81
4931428F04Rik
Aloxe3
Hmgn3
Ctsa
Tspan4
Tfcp2
Pex5l
Cox7a1
Ank3
Apoa2
Gm14244
Arhgef40
Pou4f3
Rph3al
Hsd17b3
Rasgef1c
Gm16511
Megf6
Cdc42ep4
Oat
Olfml2b
Ccdc27
Plin2
Grin2c
Stambpl1
Esx1
Tceal3
Matn2
Faim2
Acot10
Rorc
Cdc42ep5
Llgl1
Rgma
Vsig10
Gata1
Mafb
Plcd1
Map3k10
Ccdc116
Mylk
1700014D04Rik
Asic4
Elf4
Nptx2
Ksr1
Otop2
Pfkfb2
Prox2
Doc2b
C530043A13Rik
Ano1
Cdh23
Cbx6
Aldh1a2
Sdhb
Tchp
Gsta3
L1td1
Myo18a
Kirrel
Sh3bp5l
Tex29
Hpca
Myh13
Brinp1
Grasp
Kcnh3
Fam151a
Serpina3a
Prnp
Defb45
Tspo
Clic6
Ensa
Ccdc28b
1700102P08Rik
Ccp110
Sycp2
Odf3l1
Nsdhl
Zp3r
Wdr73
Tm6sf1
Polr3a
Rcn1
Gab1
Mroh5
1700031F05Rik
Tmem198
Fam110c
Lhpp
C430042M11Rik
Hfe
Pnma5
Adam26a
Cytl1
Myl1
Prnd
Aspn
Spock2
Frmpd1
Timp3
Akr1a1
Gm4980
Clec12b
Erf
Caskin1
Gm648
Mras
Cldn3
4931409K22Rik
Taf4b
Tom1l1
Trim62
Sdpr
Dlg3
Gm10639
Gm29508
Ssh3
Uchl1
Gas2l1
Ercc2
Tmed3
Scara3
Pcyt1b
S100a1
Tex101
Cuedc2
Ankrd9
Gatsl2
Fam209
Carns1
Serinc5
Ramp1
Pstpip2
Ahnak2
Rhbdl3
1700113H08Rik
Adam19
Pip5kl1
Trerf1
Gm4985
Adam20
Rhbdl2
Gm15663
Pld4
Fgf21
Nudt17
Cyth2
St5
Srgap3
Slc48a1
Gsn
Shbg
Retsat
Arnt2
Tmem200b
Synpo
Nuak2
Rlf
Arxes2
C2cd4c
Neu1
Tdrd5
Sbno2
2010204K13Rik
Asah1
Xylt2
Tab1
Zbtbd6
Creld1
Tubb6
Map4k2
Ripk4
Fam19a5
Afmid
Tk1
Tnfaip6
Scin
Gfpt1
4930513O06Rik
Pou4f2
Mtl5
Corin
Myo5b
Mknk2
Best1
Akap8l
Hist1h1c
Ackr3
Clip1
Cep290
Slc35g3
Cdc45
P4ha2
Myo5a
Gng8
Spaca1
4930596D02Rik
Pfn3
1700007K09Rik
Acot1
Tnni3
Nr0b1
Eppin
Clstn3
Mtcl1
Numa1
Plekha7
Ppp1r16b
Ptprg
Gpat2
Syt11
Gnai1
Acrv1
Akap11
Cttnbp2
Slc6a8
1700049L16Rik
Mvb12b
Fam217b
Npnt
Disc1
Hivep2
4930481A15Rik
Ndrg4
Osbpl7
Gstk1
Rassf5
4930502E18Rik
Tdrkh
AC118721.1
H2-T22
Rab11fip3
Ank
Cers3
Pcp4l1
Il10ra
Efcab9
Ace3
Arap3
Mybpc1
Cmtm4
Gm14819
Ccne2
Hist2h2bb
Crygc
Slc5a4b
Mdga1
Cyp4f15
Fbp2
Svs6
Pck1
Sptbn1
Src
Osbpl5
Smox
Car7
Drd4
Efnb1
Pomgnt2
Las1l
Tex21
Magi1
Slc36a1
Ttll3
Tenm4
Cldn10
Nid1
Baz1a
Rnpepl1
Kctd12
Plat
Wiz
Notch2
Rab34
Gls2
Amigo2
Tmprss6
Gm5878
Serhl
Cdh1
Lrrc75b
Draxin
Dhcr24
Arl6ip1
Slc38a5
Clip3
Bag2
Ankrd39
RP23-415L22.2
Catsper4
Pdpn
Prlr
Kdr
Stra6
Cidea
Lrba
Mib2
Rnh1
Tmc7
Acsf2
Spam1
Zfp358
Trip6
Dyrk4
Pycard
Eqtn
Ffar2
Cmtm6
Pld3
Clcn5
Reep5
Xylb
Fam135b
Scml4
Ttyh1
Bop1
Itch
Cdyl2
Slc4a5
Arhgap22
Aldh1l1
Gpc1
Smpdl3b
Cdh5
Tmem225
4930557F10Rik
Ctcfl
Megf8
Cdo1
Mcee
1700028P14Rik
Pnck
Rassf10
Aif1l
Atp8a1
Spata45
Igsf8
Mid1ip1
Mmp11
Fam208b
Pip5k1c
Crtc1
Golga2
Fbxo31
Ccbl1
Tle2
Slco1a5
Pdzk1ip1
Spink8
Wipf3
Anxa9
Naglu
Dusp13
BC003965
Ctsf
Gstm4
Ankrd13d
Lrrc37a
Mettl20
Fam181a
Lrcol1
Hmgcs2
Ddit4
Zcchc18
Zfp536
Tob2
Ryk
Amh
Prss12
Ttc9b
Izumo1
Slc6a4
Hyi
Spata9
Psg29
Tek
Pja1
Reps1
Wfdc6b
Epha10
Bbs1
Hsfy2
Defb14
Susd3
Sesn2
Snx33
Morf4l2
Arhgap17
Stk36
Mpzl1
Adad2
Fosl2
Btn1a1
Rhox8
Uqcc3
Jam2
Pim3
Palm
1700015E13Rik
Nkx3-1
Tha1
Cemip
Dse
Cd109
Nwd1
Ly6i
Grid1
Ctsl
Acsbg1
Fbrsl1
Os9
Nags
Sema3c
1700001J03Rik
Ampd2
Prkg1
Zfp239
Nipsnap3a
Lrrc45
Adam29
P2rx2
Olfml3
Tctn2
Ephb1
Mapkapk3
Agrn
Slc25a25
Sgms2
Map3k5
Il17ra
Gdf11
Asb15
Gm14632
1810064F22Rik
Dip2a
Csrnp1
Gpc4
Slc22a4
Sun5
Wfdc8
Kel
Hyal5
4930469K13Rik
Lzts2
Cdkn2d
Chmp7
Gm14569
Cdkn2b
Myom3
Pdzrn3
Cacna1c
Aqp5
Id1
Agpat4
Ppfibp1
Grb14
Csdc2
C87436
Slc7a14
Gm11681
Hbegf
Ndrg1
Inpp5b
Sdk2
Gpt2
Gaa
Prph2
AU021092
Dcst1
Papl
1700061G19Rik
Chga
Stac2
Rdh10
Pycr2
1700006A11Rik
Catsper3
2010300C02Rik
Cxx1c
Siva1
Fstl3
Trim26
Rec8
Lrpap1
Bcl3
Suox
Klf13
Fam46a
Rhox5
Mfge8
Ccer1
Alad
Ivd
Pex26
Racgap1
D5Ertd579e
Ehd3
Galnt18
Gm12992
Zfp740
Uckl1os
Fbxo6
Triml1
Fry
Mob3b
S100b
Fibin
Slc7a4
Gpr56
Mgarp
Prss35
Clic4
Snx29
Spata31
Chn1
Tmem108
Hapln3
Setx
Rbp1
Enho
Scn8a
A430105I19Rik
Mroh9
Ptms
Gsdma3
Sema7a
Epn1
Mad1l1
Tex33
Sncb
Dnah3
Ppp1r15a
Zdhhc24
Tmco3
Evc2
Dhtkd1
Ttn
Vps18
Pex11a
Tsga8
Syt13
Porcn
Lgi4
Tspan18
Ldhd
Sptb
Spata25
Nfe2l3
Gabarapl1
Cd81
Slc16a2
Rhbdf2
St3gal4
1700001P01Rik
2021-03-01
Cgn
Hpse
Ogdhl
Rassf1
Amy1
Leng9
Hist3h2a
Echs1
Smco4
H2-T10
Cldn23
Tmem140
Atp6ap2
Dact1
Calr4
Col27a1
Tmx4
Gdpd2
Amn
Pkn1
Rgs2
Dhx32
Fkbp9
Pvrl4
Tnnt2
Cry2
Nrbp2
Pdilt
Ankdd1b
Zcchc12
Gm867
Lyzl6
Fam107a
Ap1m2
Nucb1
Ass1
4932415D10Rik
Phactr1
Notch1
Magea10
Btbd3
Gng7
Ttc39a
Cenpa
Atad2
Gm10486
Pkia
Dnmbp
Chit1
Aldh1b1
Adgb
Ankrd10
Agt
Cenpm
Bloc1s4
Pgd
Lama3
Atr

## Sheet: E Max
E Max
Trim8
Naaa
Adora3
Aqp7
Spata13
Fzd9
Ccser2
Tor1aip1
Cdkn3
Sod3
Emilin2
Slc35f2
Gpr55
Ccdc185
Frzb
Tmsb15a
Cyp26a1
Adam1b
Mcfd2
Fhdc1
Adam6b
Actrt3
Gm4787
Gm14501
Gm28269
Gstm5
Lgmn
4933422H20Rik
CH36-500J15.2
Cacnb3
Crtam
Dcaf5
Micall2
1700100L14Rik
Syce3
RP23-173H19.3
Pgk2
Elp5
Ccdc83
Meig1
Cdk1
Wdr64
Txk
Cypt2
Mapre3
4921530L21Rik
Ltbp1
1700023F06Rik
Sh3kbp1
Lrrn4
1700030C12Rik
Ssx2ip
Oscp1
Cst13
Rhbdd1
Gm8251
Gm14983
Sulf2
Ndufv3
Tmco2
Dcun1d1
Ankrd36
Tcaim
Atp6ap1l
1700030F04Rik
Gm6432
Smcp
Ltn1
Slc25a21
4931408C20Rik
6430550D23Rik
Serf1
Fbln1
Fam71b
Fam71a
Tifa
Gpr62
Abca4
Cd96
Zfp128
Crisp2
1700012A03Rik
Calr3
Adam32
Ccin
Sdc2
Dcdc2c
4930511A02Rik
Spata4
Ropn1
Cypt4
Usp54
Phospho2
Prkag2
4931431F19Rik
Tbc1d30
Gm9999
1700015O11Rik
Pvrl2
Spata31d1b
Oit3
Cylc1
Cmbl
Sufu
Pex3
1700016C15Rik
Plbd1
Gm15104
BC048507
Srgap1
Cypt15
Fam78a
Stbd1
1700016K19Rik
H2-DMa
Zfand6
Lpcat2b
Slc16a7
Stk33
Cdk5r1
4930453H23Rik
Eif4e1b
Ybx3
Ccdc30
1700071K01Rik
Ropn1l
Cypt1
Cetn1
Stard6
Grk4
Pou5f2
Ell2
Ccdc62
Svep1
Lrrc69
Col20a1
Steap3
Efcab10
Gm14484
Tspan17
Pabpc6
Rcor1
Myo18b
2010107E04Rik
AY702103
1700026J12Rik
Lonrf2
Arhgap24
Wbp2nl
Daf2
Wbscr25
1700129C05Rik
1700026L06Rik
Sugt1
Ryr1
Mfap3l
1700012B07Rik
1700092M07Rik
P2rx7
Gm4984
Capn2
BC049702
Col22a1
Ppp3r2
Tppp2
Pdpk1
Ccnjl
Prom1
Gm597
Glt6d1
Dact2
Dhrs7
Ccdc15
Adam4
Trim14
Cmtm2b
Lpar1
Nxph1
Fam134c
Gpr179
1700008F21Rik
Fhl4
Pla2g7
Plk2
Pebp4
Sh3d21
Cap2
Wdr20rt
Tmod1
Defb36
Ube2k
Usp25
Pdzd9
F5
Klc3
1700080N15Rik
Pfkl
Sulf1
Ccdc107
Nlrp14
Spata31d1c
Hils1
Mesp1
Cntn1
Spag4
Rnf151
Lzts1
Rpgrip1
Hrasls
Frat1
Tubb3
Tekt5
Prss37
Gxylt1
Slc6a14
Nacc2
Oasl2
Flt3
Garem
Ccdc110
1700056E22Rik
Sgcg
Mgat4e
Athl1
Chl1
BC007180
Tmem132cos
Gm136
Ube2d2b
Cryz
Rnaset2a
Cmtm2a
Cypt3
Trim36
Akap3
Tmem205
Dnajb7
Fhl5
Gnptab
Ldhc
Esyt3
Ppp1r2-ps3
Ephb3
Plb1
Fbxo39
Dbi
Gm14285
Chchd2
Adam5
4933409G03Rik
Trim42
Gm11978
Tuba8
Kdelr2
Rnf213
Cotl1
Tesc
Gtsf1l
1700093K21Rik
Dhcr7
1700022F17Rik
Asb9
Ano6
Ndufa6
Pmis2
Prss51
4921539E11Rik
Erich2
Dbil5
4930453N24Rik
1700019N19Rik
1700074P13Rik
Kcnk6
4933406K04Rik
Gm7568
4933406M09Rik
Gm904
Gm14725
Srcin1
Dkkl1
Spag6
Cct6b
BC049762
Smco2
Ppp1r1c
4930407I10Rik
Pvrl3
Scp2d1
1700009J07Rik
Ube2n
Ccdc181
Hemgn
Banf2
1700015F17Rik
Tmem202
Spanxn4
P4ha1
Tspan12
Adam6a
Zfp35
Ccdc159
Mospd4
1700123L14Rik
Prdx6b
Odf1
Prss52
Gm29205
Chpt1
Iqcf6
Trp53tg5
Spa17
Oaz3
Dab1
Ccdc70
Pxdc1
1700019O17Rik
Shisa3
Tssk1
Trim45
Rnf148
Cct8l1
Trim17
1700023E05Rik
Cypt12
Cdyl
Ocln
Tap1

## Sheet: NANOS2 KO DEGs
NANOS2 KO DEGs
Cwc22
Cyp17a1
Cyp11a1
Aldh1a1
Agt
Ctsl
Sparc
Ptgds
Gm2a
Gm28437
Akr1cl
Gm14569
Lrp8
Lrp1
Malat1
Gstm2
Ncoa2
Ptprv
Slc4a3
Cdh23
Colgalt1
Hsd3b6
Lcn2
Apoe
Bhmt
Cgn
AU021092
Cyp26b1
Nedd4
Serpina3a
Gm14226
9430020K01Rik
Sparcl1
Axl
Obsl1
Esyt3
Ephx1
Pld3
Fabp3
Peg3
Fat1
Gprasp2
Trrap
Fads2
Srrm2
Gm15800
Lama2
Gpt2
Plxnb2
Lamb2
Col18a1
Alas1
Col1a2
Hmgcs2
Star
Helz
Usp9x
Cnnm1
Meg3
Sbf2
Arhgap20
Atp1a2
Dock7
Igfbp3
Col3a1
Fads1
Tgm2
Agrn
Sulf2
Fth1
Ecm1
Neat1
Pygb
Caskin1
Aqp8
Ly6e
Lamc3
Gas6
Hsd3b1
Ndst1
Itpr2
Piezo1
Tubb3
Tgfbr3
Pgbd5
Idh1
Eppin
Flna
Neo1
Lamb1
Cst9
Ogt
Arhgef25
Tpx2
Slit3
Sod3
Kmt2c
Grin2c
Mlxipl
Gm28439
Col4a4
Tmem255a
Gramd1b
Gpd1
Dhcr7
Fgl2
Tmem176b
Pex19
Apoc1
Adamts5
Pcolce
H2-D1
Hsd17b3
Emb
Nacc2
Elovl5
Mgrn1
Tsx
Slc26a10
Slc3a2
Cox6a1
Gpr55
Cd36
Sod1
Serpina3n
Kit
Cdc42ep4
Ces1d
Rab11fip4
Itih5
Nid1
Gpcpd1
Igfbp4
Prss35
Adh1
Cxcl12
Col1a1
Hspg2
Cbx6
St8sia1
Cgnl1
C7
Wdfy3
Unc5a
Ren1
Sardh
Lonp1
Cd81
Fdx1
Kdm4a
Ldhd
Col4a3
Arpc1b
Pcbp4
Myl12b
Calm3
Il6st
Capn6
Slc6a8
Kndc1
Tpm1
Phactr1
Pank1
4930486L24Rik
Gpx1
Vasn
Acadvl
Kdr
Fabp3-ps1
Aldh1l1
Mrap
Ezr
Cldn3
Gfpt2
Uchl1
Nfix
Spon1
1110008P14Rik
H2-K1
Rpl18a
Unc13d
Pdxk
Tmem176a
Ahnak
Col6a2
Adh5
Aqp2
Klk1b24
Cyp2s1
Atp11a
Klk1b21
Scd1
Nrk
Zfp641
Amh
Slc38a1
Rps24
Trip6
Mmp11
Pdgfra
Msmo1
Gsta3
Scube2
Fdft1
Plxnb1
Scpep1
Plxna1
Cyp21a1
Myh7
Tenm4
Sc5d
Uqcr10
Tln2
Map1lc3a
Dpep1
Ahcy
Padi2
Bcorl1
Oxtr
Kif26a
Nsmf
Nucb2
Hspb8
Tmem189
Zmat5
Snhg11
Tmed3
Hspd1
Mgll
Mgst1
Slc38a5
Prrc2b
Rian
C4b
Gpx4
Mt3
Fxyd1
Ddx39b
Pla2r1
Gm4846
H2-Q4
Ahsg
Slc35f2
Atp5g3
Gpx3
Agpat3
Nsdhl
Gprc5a
Cd74
Swi5
Cyp51
Rbp1
Cstb
Antxr1
Acadm
Robo4
Taldo1
Stard5
Iah1
Fdps
Myh6
Retsat
Arhgap33
Inf2
Cpxm1
Plp1
Pcyt2
Klk1b27
Chd9
Sh3pxd2b
Tmem205
Acox3
Sqle
Cacna1h
Rasgef1c
Cnn3
Sv2c
Rarres1
Bpifb5
Gm27031
Oit3
Timp1
Ston2
Iscu
A730017C20Rik
2900052N01Rik
Slc4a8
Impdh1
Insl3
H2-T23
Il17rb
Nat8
Trp53i11
Lrg1
Hao2
Npm3
Alas2
Thrsp
Aldoc
Sult1e1
Tbc1d30
Cmbl
Gbp4
Tap2
Psmb9
Tap1

## Sheet: D>A
D>A Gene	baseMean	log2FoldChange	lfcSE	stat	pvalue	padj
Rgs17	31.1049	6.64347	1.52331	4.36121	1.29344e-05	0.000429351
Klk1b3	9.562	6.40293	1.75081	3.65714	0.000255048	0.00530196
Gm806	7.23747	5.99925	1.86393	3.2186	0.0012882	0.0197292
Lpo	6.81651	5.91288	1.87866	3.14739	0.00164733	0.0238656
Nkx2-4	6.54853	5.85605	1.86701	3.1366	0.0017092	0.0245253
Gm14484	5.87396	5.70052	1.90014	3.00006	0.00269929	0.0351376
Sox17	22.2411	5.14747	1.31085	3.92682	8.60761e-05	0.0021179
Mest	68.8689	4.78784	0.721719	6.63395	3.26824e-11	5.57421e-09
Gm6812	23.4689	4.59828	1.07586	4.27404	1.91963e-05	0.000601496
Arhgef39	13.7829	4.51466	1.4019	3.22038	0.0012802	0.0196267
6030419C18Rik	66.4088	4.39276	0.669678	6.55952	5.3982e-11	8.43975e-09
4931431C16Rik	12.4481	4.35987	1.38614	3.14534	0.00165894	0.0240107
4933400C23Rik	17.8425	4.23741	1.12542	3.76518	0.000166432	0.00373156
Ptpn7	98.191	4.17825	0.584146	7.15274	8.50654e-13	2.05927e-10
Cyp2a12	31.3131	4.04048	0.851091	4.74741	2.06033e-06	9.17611e-05
1700008P02Rik	48.0958	4.02695	0.721378	5.5823	2.37357e-08	1.86012e-06
Alas2	1177.74	4.01583	0.374359	10.7272	7.5842e-27	1.13831e-23
Defb33	56.5634	4.01243	0.679248	5.90716	3.4805e-09	3.32731e-07
RP23-114N1.4	15.3659	3.94325	1.16401	3.38765	0.000704944	0.0124522
Dnaic2	220.597	3.93076	0.601096	6.53932	6.17998e-11	9.27552e-09
4921513I03Rik	13.868	3.85221	1.20639	3.19317	0.00140719	0.021248
Klk1b9	18.4399	3.8134	1.03753	3.67546	0.000237417	0.00499075
Chdh	89.4144	3.80583	0.628843	6.05211	1.42965e-09	1.54371e-07
Gas2l3	13.8874	3.78789	1.17598	3.22106	0.00127719	0.0196161
Ngfr	31.3756	3.78334	0.90859	4.16397	3.12767e-05	0.000901022
Prss58	225.498	3.74502	0.466708	8.02434	1.02077e-15	4.14073e-13
Prm1	4495.48	3.73154	0.372894	10.007	1.4206e-23	1.42145e-20
Sema6a	20.6229	3.7143	1.0016	3.70837	0.000208595	0.0045099
Epsti1	20.399	3.69625	1.02348	3.61144	0.000304503	0.00616773
Hpcal4	12.524	3.69608	1.2832	2.88036	0.00397216	0.0471157
Myb	17.6893	3.69386	1.05055	3.51613	0.000437891	0.00831938
1700096J18Rik	44.4511	3.66626	0.715753	5.12225	3.01916e-07	1.73619e-05
Gm5132	56.396	3.65997	0.660018	5.54525	2.93529e-08	2.22504e-06
Tnp1	5555.94	3.61842	0.356949	10.1371	3.78236e-24	4.05496e-21
Gm15491	50.5524	3.61757	0.712318	5.07859	3.80247e-07	2.15363e-05
H2afb1	332.047	3.60844	0.456648	7.90201	2.74452e-15	1.02981e-12
RP23-79H24.4	17.5187	3.58303	1.20269	2.97918	0.00289021	0.0370129
Cstl1	159.952	3.57626	0.506164	7.06543	1.60123e-12	3.48303e-10
Paqr5	228.514	3.53845	0.493675	7.16756	7.63467e-13	1.8785e-10
Hspb7	26.8026	3.53775	0.92682	3.81709	0.000135037	0.00312774
4921507P07Rik	543.488	3.51006	0.390617	8.98595	2.56517e-19	1.60419e-16
Akr1c12	47.9304	3.49414	0.688488	5.07509	3.87322e-07	2.18546e-05
4930538K18Rik	111.042	3.48508	0.548728	6.35119	2.13651e-10	2.65016e-08
Tmod4	22.288	3.47409	0.905222	3.83783	0.000124126	0.00291094
Gm6583	16.9493	3.47001	1.08826	3.1886	0.00142966	0.0214792
Dydc1	17.4811	3.45747	1.04419	3.31115	0.000929124	0.0154012
Slc22a18	21.5662	3.41753	0.986444	3.4645	0.00053122	0.00979494
Gm136	161.721	3.39155	0.477188	7.10738	1.18268e-12	2.67953e-10
Dok7	30.0656	3.38938	0.874921	3.87392	0.000107097	0.00257187
Sall3	24.6453	3.3698	0.856835	3.93285	8.39438e-05	0.00207564
1700015G11Rik	97.4075	3.36506	0.55677	6.04391	1.50425e-09	1.61266e-07
Ablim1	39.3831	3.35085	0.717298	4.67149	2.99018e-06	0.00012432
Spata32	160.047	3.29133	0.486399	6.76672	1.31735e-11	2.5028e-09
Arhgef6	55.3114	3.28784	0.620481	5.29886	1.16527e-07	7.37957e-06
Tex37	271.918	3.28611	0.499319	6.58118	4.66723e-11	7.5323e-09
Mapk13	59.2337	3.27009	0.617305	5.29737	1.17482e-07	7.38663e-06
Ankrd35	50.1789	3.26123	0.644208	5.06238	4.14046e-07	2.31019e-05
Gm16464	14.1315	3.25625	1.13838	2.86044	0.00423057	0.049568
Rsf1os1	12.9438	3.25419	1.12199	2.90038	0.00372712	0.0447523
4930435E12Rik	75.4508	3.23071	0.58226	5.54857	2.88013e-08	2.21298e-06
Gm9059	31.6433	3.21728	0.780827	4.12035	3.78295e-05	0.00106326
Rhcg	82.0107	3.20534	0.678989	4.72075	2.34974e-06	0.000102224
1700034G24Rik	60.0858	3.20038	0.645636	4.95694	7.16117e-07	3.7713e-05
Cby3	45.3934	3.19711	0.679806	4.70297	2.56407e-06	0.00010902
BC055111	126.512	3.18613	0.498004	6.3978	1.57631e-10	2.05729e-08
PCDHGA12	21.4163	3.18191	0.965129	3.29688	0.000977654	0.0159496
RP24-276N7.2	32.3972	3.17328	0.792622	4.00353	6.24054e-05	0.00160935
Gm11634	82.3556	3.14997	0.569316	5.53291	3.14966e-08	2.36366e-06
Ccna1	257.892	3.1206	0.576332	5.4146	6.14266e-08	4.13431e-06
1700042G07Rik	156.652	3.11343	0.48065	6.47754	9.3232e-11	1.30778e-08
Diras2	269.628	3.09963	0.425447	7.28558	3.20287e-13	8.58427e-11
Zfp354a	29.328	3.09399	0.815138	3.79567	0.000147245	0.00333837
Rfx8	144.459	3.09242	0.567219	5.45189	4.98363e-08	3.43116e-06
Cntnap5b	104.411	3.08932	0.578456	5.34062	9.26297e-08	5.91608e-06
Pkdrej	125.092	3.08234	0.587781	5.24402	1.57113e-07	9.62491e-06
Cdrt4	299.052	3.07595	0.431661	7.12585	1.03444e-12	2.46443e-10
1700020N15Rik	16.8197	3.07123	0.962407	3.1912	0.00141686	0.021351
Asb17	216.465	3.03211	0.426726	7.10552	1.19869e-12	2.67953e-10
Gm6960	175.092	3.01858	0.514478	5.86726	4.4305e-09	4.13027e-07
Bpifa3	168.27	3.01436	0.478502	6.29958	2.98449e-10	3.58354e-08
Tnp2	5086.75	3.00925	0.435529	6.90941	4.86684e-12	9.87113e-10
Msx2	19.6368	3.00238	0.901078	3.33199	0.000862281	0.0145415
4930557A04Rik	73.3431	2.99924	0.628406	4.77278	1.81705e-06	8.19134e-05
Hdc	484.331	2.99057	0.391031	7.64792	2.04259e-14	6.45116e-12
St3gal1	72.4136	2.98106	0.569045	5.2387	1.61713e-07	9.86644e-06
Actrt1	53.2751	2.95258	0.608392	4.85308	1.21558e-06	5.98186e-05
1700010D01Rik	146.432	2.94817	0.484327	6.08715	1.1494e-09	1.26849e-07
A530016L24Rik	31.0233	2.943	0.763187	3.85619	0.000115167	0.00274373
Rnf133	449.591	2.93996	0.413518	7.10963	1.16354e-12	2.67953e-10
Gm5893	235.636	2.92787	0.442748	6.61296	3.7672e-11	6.35302e-09
Gjb3	29.4624	2.92663	0.8058	3.63195	0.000281287	0.00579127
Fscn3	555.916	2.92652	0.465835	6.28232	3.33566e-10	3.9734e-08
4930486I03Rik	15.3463	2.92385	0.983376	2.97328	0.00294638	0.0375269
1700034E13Rik	220.406	2.92177	0.44734	6.53143	6.51462e-11	9.58607e-09
Mylk3	119.636	2.91125	0.542182	5.3695	7.89545e-08	5.17479e-06
Ppp1r2-ps7	64.8041	2.86727	0.565715	5.06839	4.01197e-07	2.25527e-05
1700084M14Rik	109.255	2.86617	0.492956	5.81424	6.09084e-09	5.4741e-07
1700003E24Rik	62.1172	2.85653	0.569608	5.0149	5.30604e-07	2.91716e-05
Slc15a1	32.6725	2.84971	0.795441	3.58256	0.000340248	0.00673718
Hmgb4	907.256	2.84925	0.449882	6.33332	2.39935e-10	2.95179e-08
Gas6	2383.82	2.84899	0.352052	8.09251	5.84491e-16	2.50646e-13
Hspa1l	2421.65	2.84639	0.420921	6.76228	1.35841e-11	2.54855e-09
Plxna2	48.8515	2.83891	0.733134	3.8723	0.000107815	0.00258086
Adcy2	197.773	2.83764	0.42719	6.64257	3.0826e-11	5.31801e-09
1700019M22Rik	391.145	2.81746	0.389387	7.23564	4.63348e-13	1.17871e-10
Spry1	159.696	2.81643	0.443303	6.35328	2.1077e-10	2.63621e-08
Ubqlnl	477.296	2.81595	0.384149	7.33035	2.29544e-13	6.26406e-11
Il17re	173.956	2.81059	0.48774	5.76248	8.28861e-09	7.19097e-07
Slc16a4	17.2979	2.79153	0.927175	3.01079	0.00260573	0.0342764
1700012L04Rik	26.5148	2.78633	0.785451	3.54743	0.000389002	0.00755309
Fam71f2	1077.41	2.78617	0.424091	6.56974	5.04021e-11	7.963e-09
Fa2h	103.791	2.77794	0.624461	4.44854	8.64562e-06	0.000298991
4930503B20Rik	245.213	2.77458	0.429683	6.45727	1.06605e-10	1.45248e-08
Fam154aos	27.3107	2.76696	0.815816	3.39165	0.000694738	0.0123109
Ctag2	63.205	2.76541	0.585943	4.71959	2.3632e-06	0.000102512
Gm11608	23.3345	2.75691	0.905796	3.04363	0.00233743	0.0313236
BC061195	82.1424	2.75591	0.52935	5.20623	1.92718e-07	1.15239e-05
Akr1c13	341.148	2.75393	0.4209	6.54295	6.03153e-11	9.15665e-09
Plk1	218.34	2.7411	0.593051	4.62203	3.79998e-06	0.000149695
Akap4	2816.17	2.73321	0.357429	7.64685	2.05959e-14	6.45116e-12
1700016P04Rik	75.217	2.7291	0.533611	5.11441	3.14721e-07	1.80292e-05
Gm4665	44.7925	2.72311	0.643706	4.23036	2.33313e-05	0.000713984
Prkcb	50.2143	2.71409	0.671516	4.04174	5.30556e-05	0.0014094
Ophn1	55.2322	2.7109	0.609879	4.44498	8.7902e-06	0.000302668
Gm5334	93.4932	2.70215	0.5702	4.73895	2.14834e-06	9.53976e-05
Spry4	97.7397	2.70189	0.493479	5.47518	4.37063e-08	3.10313e-06
Gm6657	89.1022	2.69801	0.513661	5.25251	1.50038e-07	9.22921e-06
Fam71d	304.918	2.69745	0.412178	6.5444	5.97349e-11	9.15665e-09
Pdzd2	753.042	2.69194	0.387395	6.94883	3.68337e-12	7.78643e-10
Spata3	629.44	2.69073	0.421091	6.3899	1.6599e-10	2.12935e-08
Gm6760	114.387	2.68747	0.495902	5.41937	5.98103e-08	4.04366e-06
Adap1	28.0171	2.68677	0.817329	3.28726	0.00101167	0.0163799
Gm4772	19.2639	2.68277	0.912489	2.94006	0.00328154	0.0403974
Oxct2a	598.191	2.68112	0.485182	5.526	3.27606e-08	2.44629e-06
Klk1b8	56.5751	2.67401	0.586732	4.55746	5.17763e-06	0.000192831
Tox2	303.036	2.67103	0.404341	6.60588	3.9515e-11	6.58979e-09
Pls3	252.021	2.67022	0.463978	5.75506	8.661e-09	7.42817e-07
4930549C01Rik	63.0108	2.66678	0.614942	4.33663	1.44682e-05	0.00047003
Helt	47.3096	2.66539	0.615829	4.32814	1.50375e-05	0.000486419
1700120K04Rik	24.0887	2.65927	0.796699	3.33786	0.000844248	0.0143017
Zc2hc1c	93.3251	2.65797	0.629588	4.22176	2.42402e-05	0.000736479
1110017D15Rik	646.705	2.65536	0.460967	5.76042	8.39053e-09	7.23755e-07
Oxct2b	583.74	2.65003	0.447264	5.92497	3.12349e-09	3.04419e-07
Tctex1d1	216.29	2.64795	0.438903	6.03311	1.60835e-09	1.69998e-07
Nme8	121.269	2.63962	0.48647	5.42607	5.7609e-08	3.91246e-06
Galntl5	477.102	2.63218	0.390444	6.74152	1.56741e-11	2.90434e-09
Aph1b	52.5899	2.625	0.652841	4.02089	5.79797e-05	0.00151178
Filip1	43.0524	2.62472	0.668812	3.92445	8.69284e-05	0.00213188
Ms4a5	119.279	2.61305	0.469479	5.56585	2.60884e-08	2.01835e-06
Lingo1	43.7674	2.60534	0.657286	3.96379	7.37704e-05	0.0018703
Ccdc54	371.696	2.59064	0.38655	6.70196	2.05638e-11	3.76393e-09
2610318N02Rik	1871.27	2.58925	0.444465	5.82555	5.69233e-09	5.17795e-07
Cdc14a	344.595	2.58563	0.410192	6.30345	2.91098e-10	3.52347e-08
Ms4a14	328.903	2.57776	0.431787	5.96998	2.37277e-09	2.39013e-07
Golm1	157.878	2.56794	0.498877	5.14744	2.64059e-07	1.53615e-05
Spatc1	468.931	2.56447	0.430791	5.95294	2.63365e-09	2.63523e-07
Csnka2ip	149.426	2.56391	0.473852	5.41078	6.27525e-08	4.20469e-06
Sh3rf2	391.299	2.56177	0.44573	5.74735	9.06553e-09	7.68726e-07
Gm11981	47.9867	2.56018	0.671894	3.81039	0.000138748	0.00319797
Gm16279	46.1987	2.55437	0.625688	4.08249	4.45553e-05	0.00122703
Gm13539	18.1502	2.53198	0.883361	2.8663	0.00415301	0.0487735
Prss39	394.733	2.52748	0.460321	5.49068	4.00387e-08	2.88914e-06
Reln	116.224	2.5101	0.468084	5.36249	8.2082e-08	5.3332e-06
Map6d1	58.4237	2.50177	0.575601	4.34636	1.38418e-05	0.000451634
Syk	33.2825	2.49818	0.698424	3.57688	0.000347723	0.00684904
H1fnt	1151.74	2.47666	0.446523	5.54654	2.91372e-08	2.2199e-06
4921517D22Rik	51.8526	2.46276	0.610881	4.03149	5.54251e-05	0.001462
Emb	268.865	2.46258	0.450022	5.47213	4.44659e-08	3.11864e-06
Gm5941	86.718	2.46239	0.50803	4.84694	1.25379e-06	6.1098e-05
3110035E14Rik	188.674	2.44957	0.495891	4.93973	7.82297e-07	4.04879e-05
Efcab8	124.147	2.4482	0.604435	4.0504	5.11301e-05	0.00137168
Rnf112	24.2859	2.44811	0.837005	2.92484	0.00344629	0.042019
Tfam	431.136	2.43839	0.385412	6.32671	2.50441e-10	3.05599e-08
BC049702	19.3308	2.43551	0.850787	2.86266	0.00420101	0.0492602
BC049635	333.115	2.43172	0.404538	6.01111	1.84259e-09	1.90444e-07
Pygl	145.58	2.42847	0.497577	4.88059	1.05771e-06	5.2493e-05
Gm15612	28.2735	2.41978	0.768541	3.14854	0.00164088	0.0237952
Spem1	804.844	2.41943	0.426888	5.66759	1.4482e-08	1.18776e-06
Ttc24	148.332	2.41397	0.55329	4.36293	1.2833e-05	0.000428024
Dnajc5b	210.316	2.40935	0.449152	5.36422	8.12993e-08	5.30531e-06
Gapdhs	2717.83	2.40856	0.429103	5.61302	1.9883e-08	1.58736e-06
4933400A11Rik	50.6471	2.40785	0.59481	4.0481	5.16346e-05	0.00137892
Gda	119.857	2.40456	0.54026	4.45075	8.5572e-06	0.000296617
Prss40	74.8648	2.40382	0.588807	4.08253	4.45482e-05	0.00122703
1700067K01Rik	46.3221	2.40029	0.683703	3.51072	0.000446902	0.00846914
Igf2bp3	196.859	2.40026	0.439948	5.45577	4.87619e-08	3.37266e-06
1700013G24Rik	542.085	2.3952	0.442926	5.40767	6.38505e-08	4.25926e-06
Agpat2	275.546	2.38459	0.463995	5.13927	2.75807e-07	1.5983e-05
Enpp1	26.7784	2.37857	0.790522	3.00887	0.00262225	0.0343991
1700080E11Rik	199.462	2.37591	0.482393	4.92526	8.42477e-07	4.28635e-05
Cd34	57.2909	2.3728	0.574069	4.13331	3.57581e-05	0.00101263
Gmpr	150.791	2.37086	0.469108	5.05398	4.32703e-07	2.39647e-05
Gsdma	23.1185	2.36262	0.812284	2.90861	0.0036304	0.0439779
Clmn	692.557	2.35675	0.445409	5.2912	1.21515e-07	7.5677e-06
Crabp1	30.0632	2.35452	0.752144	3.13041	0.00174561	0.0249523
AI507597	298.961	2.35335	0.470137	5.00566	5.56717e-07	3.03846e-05
Spz1	1737.69	2.35006	0.390073	6.02466	1.69464e-09	1.77866e-07
1700125H03Rik	30.4512	2.34935	0.717562	3.27407	0.0010601	0.0169087
Shisa3	25.7548	2.3387	0.762495	3.06717	0.00216094	0.0294401
Spata18	975.6	2.32653	0.411824	5.64932	1.61085e-08	1.3119e-06
Dram1	121.155	2.32106	0.471365	4.92412	8.47403e-07	4.29685e-05
4930469G21Rik	124.777	2.32046	0.492467	4.7119	2.45414e-06	0.000105214
Mcf2	152.527	2.3195	0.503618	4.60566	4.11151e-06	0.000159456
Mxra8	100.351	2.31245	0.629154	3.6755	0.000237388	0.00499075
Pxk	207.774	2.2988	0.453746	5.06627	4.0568e-07	2.27196e-05
Rgsl1	56.0459	2.29234	0.569063	4.02827	5.61877e-05	0.00147434
Lhfpl2	116.403	2.2912	0.47871	4.78619	1.69975e-06	7.73075e-05
AF366264	92.2975	2.28867	0.495335	4.62046	3.82887e-06	0.000150438
Glb1l3	512.409	2.28829	0.416541	5.49356	3.93901e-08	2.85607e-06
Cep85l	354.568	2.27974	0.432639	5.26938	1.36885e-07	8.45478e-06
Prm2	8397.21	2.27571	0.416821	5.45967	4.77025e-08	3.31466e-06
8430419L09Rik	641.615	2.26716	0.36496	6.21208	5.22882e-10	6.03688e-08
Iqcf3	755.072	2.26352	0.402966	5.61715	1.94129e-08	1.55812e-06
Arhgef37	74.5675	2.26264	0.518554	4.36335	1.28084e-05	0.000428024
Atp6ap1l	46.5874	2.25743	0.693641	3.25447	0.00113604	0.0179252
Gpd2	1235.47	2.25403	0.408783	5.51399	3.50786e-08	2.60641e-06
CK137956	276.642	2.25391	0.531987	4.23677	2.26759e-05	0.000695996
Hdhd1a	107.324	2.25288	0.502671	4.48182	7.40106e-06	0.000261371
Skp2	391.692	2.247	0.407761	5.51058	3.57645e-08	2.63326e-06
Tcte1	385.749	2.24365	0.556414	4.03233	5.52258e-05	0.0014593
Dpysl5	1053.52	2.23513	0.371888	6.01024	1.85255e-09	1.90444e-07
Spata19	339.502	2.23398	0.408618	5.46716	4.57306e-08	3.19242e-06
Car2	330.884	2.23008	0.47571	4.6879	2.76019e-06	0.00011572
Fam84b	112.787	2.22757	0.534959	4.164	3.12714e-05	0.000901022
Gm7236	31.1265	2.2238	0.710316	3.13072	0.00174379	0.02495
Fam105a	80.1923	2.22167	0.509956	4.35659	1.32107e-05	0.00043578
Noxred1	199.641	2.21813	0.430024	5.15815	2.49406e-07	1.46224e-05
Jag1	93.4881	2.21442	0.536781	4.12537	3.70141e-05	0.0010423
Rasa3	281.696	2.20834	0.428405	5.15479	2.53922e-07	1.48292e-05
1700001O22Rik	465.255	2.20112	0.454367	4.84436	1.27023e-06	6.14994e-05
Cmtm1	55.986	2.19796	0.667153	3.29453	0.000985857	0.0160311
1700003F12Rik	334.636	2.18456	0.454421	4.80736	1.52936e-06	7.04117e-05
Iqcf1	274.475	2.18019	0.475541	4.58465	4.54745e-06	0.000173671
Fam187b	416.132	2.17911	0.470228	4.63416	3.58394e-06	0.000143739
1700024P04Rik	101.184	2.17485	0.485257	4.48185	7.39995e-06	0.000261371
Fam71f1	621.731	2.17441	0.41806	5.20119	1.98014e-07	1.17936e-05
Me3	53.4311	2.17024	0.586146	3.70256	0.000213434	0.00457633
Pdzd9	156.812	2.1679	0.504506	4.29707	1.73068e-05	0.000549171
9330171B17Rik	63.2783	2.16547	0.681772	3.17624	0.00149198	0.0221495
Adam3	829.399	2.16538	0.368178	5.88135	4.06941e-09	3.84137e-07
Tex35	327.578	2.16252	0.454362	4.75945	1.94117e-06	8.67112e-05
Fnbp1	590.988	2.1624	0.39352	5.49504	3.90627e-08	2.84608e-06
Txndc2	1099.39	2.1601	0.399792	5.40307	6.55082e-08	4.3505e-06
4932418E24Rik	551.412	2.15823	0.471627	4.57613	4.73659e-06	0.000179072
Actl11	1229.66	2.15709	0.462012	4.66889	3.02826e-06	0.000125555
Cypt3	139.785	2.15698	0.547501	3.93969	8.15866e-05	0.00202737
Fermt2	144.358	2.14839	0.506581	4.24096	2.22567e-05	0.00068453
Gpm6b	333.731	2.14797	0.480878	4.46677	7.94084e-06	0.000277172
Actg2	606.778	2.14506	0.442723	4.84516	1.26511e-06	6.14497e-05
Plce1	163.445	2.13683	0.461855	4.62662	3.71682e-06	0.000147973
Gm498	297.514	2.13454	0.443018	4.81818	1.44873e-06	6.75279e-05
Rerg	54.4806	2.13182	0.637948	3.34168	0.000832719	0.0141543
Cst8	261.175	2.12933	0.441509	4.82285	1.41521e-06	6.65857e-05
Hypm	104.012	2.12884	0.551684	3.8588	0.000113944	0.0027189
Lgals1	1630.58	2.12761	0.37302	5.70376	1.17196e-08	9.77223e-07
Capza3	317.897	2.12735	0.435023	4.89021	1.00729e-06	5.05633e-05
Rasl2-9	139.717	2.11545	0.562339	3.76188	0.000168643	0.00377217
Herpud1	499.026	2.1142	0.436821	4.83996	1.29863e-06	6.24715e-05
Sept11	70.7577	2.11419	0.569183	3.71443	0.000203664	0.00444301
Foxq1	134.382	2.112	0.447029	4.72452	2.30661e-06	0.000101228
4930584F24Rik	32.0269	2.10874	0.676102	3.11896	0.00181488	0.0255291
B4galt6	123.135	2.10855	0.56352	3.74174	0.000182752	0.00401599
Slc30a4	387.549	2.10278	0.406137	5.17751	2.24865e-07	1.32874e-05
BC049715	133.267	2.10015	0.48666	4.31543	1.59291e-05	0.000509764
Ccno	75.9629	2.09985	0.52577	3.99386	6.50055e-05	0.00167353
Ace	1410.12	2.09405	0.421419	4.96904	6.72867e-07	3.59397e-05
1700001C19Rik	241.313	2.09391	0.424729	4.93	8.22317e-07	4.21234e-05
Vash2	350.223	2.09295	0.396982	5.27215	1.34837e-07	8.36265e-06
Slc16a14	72.2609	2.09289	0.532112	3.93317	8.38317e-05	0.00207564
Ctxn1	131.758	2.08869	0.449285	4.64891	3.33694e-06	0.000136469
Ddi1	372.74	2.08624	0.432297	4.82594	1.39348e-06	6.57695e-05
Peli2	230.214	2.08582	0.562562	3.70772	0.000209134	0.0045099
Stk35	643.947	2.08308	0.441884	4.71408	2.42807e-06	0.000104646
Rilpl1	93.5763	2.08047	0.482318	4.31349	1.60698e-05	0.000512083
Izumo3	62.1644	2.07983	0.594666	3.49748	0.000469673	0.00887823
Pwwp2b	1162.67	2.07917	0.494907	4.20113	2.65583e-05	0.000792008
Lipe	878.688	2.07632	0.446757	4.64754	3.35915e-06	0.000137004
Cylc1	167.594	2.07317	0.430042	4.82087	1.42934e-06	6.70407e-05
Mtap	153.932	2.07058	0.442554	4.6787	2.88702e-06	0.000120365
Pkib	104.534	2.07007	0.489365	4.23012	2.33571e-05	0.000713984
Slc41a2	345.638	2.06746	0.422591	4.89234	9.9645e-07	5.0187e-05
Kif18b	117.608	2.0541	0.613844	3.34629	0.00081902	0.0139848
Tarsl2	339.815	2.05274	0.449406	4.56767	4.93165e-06	0.000185048
Cep112	186.031	2.05046	0.424682	4.82822	1.37761e-06	6.52256e-05
Gm4907	37.975	2.0478	0.6756	3.03108	0.0024368	0.0323376
4933413G19Rik	55.4832	2.04278	0.571545	3.57414	0.000351381	0.00689396
Tmem53	407.665	2.04227	0.441624	4.62446	3.75583e-06	0.000149088
Sppl2c	735.393	2.04128	0.453282	4.50333	6.6896e-06	0.000241356
Xk	34.3594	2.03954	0.65693	3.10465	0.00190501	0.0265659
Fam132a	343.146	2.03576	0.40626	5.01097	5.41567e-07	2.96656e-05
Eva1c	105.537	2.03279	0.509039	3.99338	6.51379e-05	0.00167407
Pappa	48.3652	2.03009	0.618223	3.28375	0.00102436	0.0165319
Foxm1	280.202	2.02722	0.516666	3.92366	8.72139e-05	0.00213539
Spert	1876.4	2.02686	0.429257	4.72179	2.33774e-06	0.000101998
Espn	4234.7	2.02206	0.347676	5.81594	6.02939e-09	5.45151e-07
4933411K16Rik	2245.44	2.01683	0.4196	4.80655	1.53553e-06	7.04795e-05
Dydc2	59.8669	2.01296	0.549787	3.66133	0.000250905	0.00522307
4930505A04Rik	100.16	2.00856	0.490762	4.09273	4.2633e-05	0.00118277
1700017D01Rik	95.71	2.00837	0.48333	4.15529	3.2488e-05	0.000930557
Otub2	528.899	2.00724	0.418038	4.80157	1.57423e-06	7.20355e-05
Rusc2	109.21	1.99704	0.586246	3.4065	0.000658027	0.0117435
Etv5	642.962	1.99234	0.363229	5.48507	4.13297e-08	2.95389e-06
1700008I05Rik	37.5165	1.99219	0.639741	3.11405	0.00184538	0.0259173
Spanxn4	159.133	1.991	0.439205	4.53319	5.80986e-06	0.000213726
4932431P20Rik	135.58	1.98787	0.451007	4.40762	1.04515e-05	0.000353301
Ctnna3	152.715	1.98505	0.442223	4.4888	7.16248e-06	0.000254141
Vwa3a	148.15	1.98057	0.438901	4.51256	6.40498e-06	0.000232766
Gsg1	3517.39	1.97743	0.442449	4.46928	7.84822e-06	0.000274578
Actrt2	2101.22	1.97663	0.490431	4.03038	5.56863e-05	0.00146631
Dscaml1	38.0256	1.97648	0.685527	2.88315	0.00393722	0.0467514
Tmem255a	934.174	1.97615	0.477908	4.135	3.54951e-05	0.00100708
Aldh1a3	131.084	1.97353	0.475427	4.15107	3.30923e-05	0.000946063
Arl9	101.473	1.97205	0.511587	3.85476	0.000115842	0.00275541
1700027A15Rik	303.707	1.97193	0.424508	4.64522	3.39712e-06	0.000138177
Rap1gap2	64.9954	1.97078	0.549785	3.58464	0.000337542	0.00670128
Msrb3	176.819	1.96551	0.455946	4.31084	1.62637e-05	0.000517166
Cdr2l	213.549	1.96498	0.418502	4.69527	2.66251e-06	0.000112886
Slc34a2	132.855	1.96205	0.599928	3.27048	0.00107364	0.0171065
Grin2b	75.4252	1.95986	0.554017	3.53755	0.000403858	0.00778113
Ube2j1	786.591	1.95955	0.385483	5.08338	3.70777e-07	2.10795e-05
Tmsb15a	88.5702	1.95876	0.546416	3.58474	0.000337417	0.00670128
Ovol2	97.3851	1.95655	0.632713	3.09232	0.00198596	0.0274721
Ccdc178	89.4308	1.95445	0.491805	3.97405	7.06621e-05	0.00179757
Gm16226	93.1345	1.9522	0.511066	3.81986	0.000133527	0.00309754
Chn2	544.035	1.94731	0.418756	4.65023	3.31566e-06	0.000135969
Cap2	139.905	1.94563	0.489288	3.97644	6.99532e-05	0.00178559
4930442L01Rik	37.8163	1.94292	0.640606	3.03294	0.00242181	0.0321672
Plekho1	400.664	1.94265	0.420223	4.62291	3.78402e-06	0.000149459
Iqsec2	113.057	1.94065	0.476595	4.0719	4.66314e-05	0.00127717
4930544D05Rik	199.111	1.93146	0.502671	3.84239	0.000121842	0.00286635
1700110K17Rik	37.4043	1.9279	0.668068	2.88578	0.00390443	0.0464723
Alox12	481.295	1.92772	0.397655	4.84771	1.24892e-06	6.10586e-05
Aurka	344.159	1.92433	0.535492	3.59357	0.000326174	0.00656239
Atp1a4	1785.12	1.92336	0.432709	4.44492	8.79228e-06	0.000302668
Spata6	964.91	1.91663	0.358306	5.34914	8.83728e-08	5.66832e-06
Slfnl1	756.493	1.91105	0.467091	4.0914	4.28786e-05	0.00118739
Gm15104	84.7468	1.9098	0.498982	3.82739	0.000129508	0.00300896
4933402P03Rik	791.047	1.90917	0.44552	4.28527	1.82517e-05	0.000577933
Plxnb2	1500.69	1.90563	0.366479	5.19983	1.99475e-07	1.18337e-05
Cd302	352.137	1.90252	0.406597	4.67912	2.88103e-06	0.000120365
Map3k6	113.658	1.89468	0.461026	4.10969	3.96182e-05	0.00111146
1700100L14Rik	52.6407	1.89241	0.599546	3.1564	0.0015973	0.0233209
Arc	415.936	1.8883	0.60079	3.14303	0.00167207	0.0241541
4931414P19Rik	106.849	1.88434	0.465201	4.05058	5.10905e-05	0.00137168
Gm5901	109.475	1.88402	0.567178	3.32174	0.000894572	0.0150186
Bik	229.484	1.8838	0.420741	4.47733	7.55816e-06	0.000265048
Pla2r1	37.0424	1.88287	0.656653	2.86737	0.00413901	0.0486472
Rbm4b	550.113	1.88095	0.430903	4.36513	1.27047e-05	0.000426418
Rap1a	150.72	1.88021	0.512695	3.66732	0.000245109	0.00512374
Ptpn9	285.491	1.87888	0.394356	4.76443	1.89384e-06	8.51039e-05
Cdc34-ps	55.0674	1.87633	0.611306	3.06938	0.00214504	0.0292947
Nt5c1b	800.283	1.87384	0.398054	4.7075	2.50777e-06	0.000106929
Pde1a	248.288	1.87159	0.409578	4.56957	4.88722e-06	0.00018384
Abhd16b	172.032	1.87029	0.540846	3.45808	0.000544037	0.00994575
Zfp39	96.5587	1.86865	0.500778	3.73149	0.000190351	0.00417077
Itgae	119.863	1.86114	0.560711	3.31924	0.000902623	0.0150863
4933402N03Rik	92.9077	1.8601	0.537634	3.45979	0.000540589	0.00989476
D830044I16Rik	539.062	1.8581	0.435626	4.26536	1.99581e-05	0.000622768
1700029B22Rik	74.0235	1.85702	0.574214	3.23403	0.00122058	0.0189058
Olig1	119.518	1.8563	0.451889	4.10787	3.99331e-05	0.0011182
Lrrc18	797.904	1.85426	0.406363	4.56306	5.04132e-06	0.000188691
Elmo1	421.543	1.85299	0.383726	4.82894	1.37265e-06	6.51965e-05
Dnajb8	554.156	1.85165	0.453608	4.08205	4.4641e-05	0.00122714
Unc5a	165.532	1.84481	0.427102	4.31936	1.56479e-05	0.000502912
Rp2h	55.7021	1.84462	0.566019	3.25893	0.00111835	0.0177186
Dnajb3	974.509	1.84294	0.441513	4.17414	2.99117e-05	0.000873433
Plcz1	157.377	1.83864	0.449541	4.09003	4.3132e-05	0.00119221
Isoc2b	100.34	1.83712	0.495583	3.70699	0.000209734	0.00451635
Ston1	61.0518	1.83205	0.555782	3.29636	0.000979471	0.0159619
Cmbl	128.298	1.83183	0.470756	3.89125	9.97298e-05	0.00241426
Slc25a37	82.5676	1.83068	0.579487	3.15914	0.00158238	0.0231255
Iqcf5	103.048	1.8279	0.492219	3.7136	0.000204335	0.00445118
Rnd2	1381.22	1.82662	0.368859	4.95208	7.34248e-07	3.85326e-05
Slc2a8	141.315	1.82508	0.480188	3.80075	0.000144259	0.00329055
1700019D03Rik	373.717	1.82427	0.419266	4.35109	1.35462e-05	0.00044392
Gm4875	134.552	1.82003	0.469887	3.87334	0.000107353	0.0025739
Prm3	264.475	1.81866	0.503514	3.61193	0.000303923	0.0061643
Fem1b	634.801	1.81713	0.416655	4.36124	1.2933e-05	0.000429351
Ubqln3	756.879	1.81582	0.440046	4.12644	3.68425e-05	0.00103942
Rfk	170.28	1.81246	0.424884	4.26579	1.99195e-05	0.000622768
Tcp10c	468.987	1.81094	0.402034	4.50445	6.65466e-06	0.000240674
Abca17	87.9278	1.81021	0.553878	3.26824	0.00108218	0.0171963
1700016C15Rik	54.7336	1.80898	0.578496	3.12705	0.00176572	0.025159
1700031M16Rik	230.606	1.80803	0.408259	4.42863	9.48322e-06	0.000324963
Tex13a	114.902	1.80648	0.49559	3.64511	0.000267275	0.00551833
Bfsp1	66.5012	1.80483	0.532029	3.39235	0.000692946	0.0122936
Odf2	7584.97	1.80479	0.390313	4.62397	3.76471e-06	0.000149088
Psmf1	884.458	1.79869	0.400129	4.49529	6.94767e-06	0.000247103
Ppp2r2b	109.37	1.79784	0.485838	3.70051	0.00021517	0.00460696
Prss21	77.009	1.7958	0.624998	2.87329	0.00406215	0.0480069
Ccnb1	125.87	1.78909	0.565896	3.16152	0.00156946	0.0230039
Plekhf1	109.58	1.7888	0.475117	3.76496	0.000166576	0.00373156
Itpr2	333.049	1.78301	0.43888	4.06262	4.85241e-05	0.00131938
Herpud2	314.128	1.78237	0.408726	4.3608	1.29586e-05	0.000429351
Ppfibp2	265.098	1.78165	0.40266	4.42469	9.65816e-06	0.000328706
Naalad2	54.5314	1.7787	0.594439	2.99223	0.0027695	0.0357723
Tshz2	74.9341	1.77753	0.504184	3.52556	0.000422582	0.00806898
Anxa13	47.8127	1.77742	0.616276	2.88414	0.0039249	0.046642
Kif2c	612.87	1.77717	0.422525	4.20607	2.59852e-05	0.000783157
Pmfbp1	954.154	1.76917	0.438082	4.03845	5.38056e-05	0.0014268
1700001K19Rik	551.538	1.76906	0.465145	3.80324	0.000142817	0.00327259
Kctd16	86.9367	1.76628	0.500465	3.52927	0.000416702	0.00798759
Daf2	79.8505	1.76381	0.500335	3.52526	0.000423064	0.00806898
Dnah10	195.169	1.76366	0.57369	3.07424	0.00211037	0.0289396
Tepp	171.77	1.76345	0.483454	3.64761	0.000264692	0.00547968
4930589P08Rik	101.713	1.76265	0.600737	2.93415	0.00334461	0.0408789
Ptar1	62.6377	1.76087	0.567465	3.10305	0.00191536	0.0266428
Sh3rf1	156.6	1.75957	0.428874	4.10278	4.08214e-05	0.00113908
Zc3hav1	86.8503	1.75657	0.497654	3.5297	0.000416038	0.00798506
1700011H14Rik	43.6726	1.74783	0.607945	2.87498	0.00404052	0.047789
Slc9a2	288.948	1.74764	0.402028	4.34705	1.37981e-05	0.00045119
Col20a1	122.17	1.74499	0.520155	3.35476	0.00079434	0.013688
Spata21	2549.34	1.74423	0.442164	3.94475	7.98827e-05	0.00199494
Sowahd	432.139	1.74419	0.378571	4.60731	4.0792e-06	0.000158613
Zcchc13	95.9588	1.74182	0.521115	3.34249	0.000830294	0.0141291
Pfkp	193.23	1.74045	0.558918	3.11396	0.00184593	0.0259173
Aif1	616.817	1.73243	0.430761	4.0218	5.77559e-05	0.00151021
Proca1	336.498	1.73241	0.461458	3.75422	0.000173886	0.00385502
Papolb	420.211	1.73208	0.373114	4.64222	3.44684e-06	0.000139821
1700109G14Rik	62.9237	1.72622	0.583873	2.95649	0.00311159	0.0391138
Spred2	92.7182	1.72555	0.482489	3.57636	0.000348414	0.00685366
Ttc9	158.282	1.7239	0.425635	4.05018	5.11787e-05	0.00137168
Zbbx	242.408	1.72211	0.404836	4.25385	2.10126e-05	0.000650265
Fam166a	383.632	1.72206	0.413507	4.16451	3.12018e-05	0.000901022
Rab13	262.069	1.72031	0.398775	4.31399	1.60334e-05	0.000512011
BC100451	1053.93	1.71987	0.44754	3.84295	0.000121565	0.00286432
Gsg2	859.719	1.71947	0.406865	4.22615	2.37722e-05	0.000725198
Prss55	263.167	1.7152	0.474671	3.61345	0.000302148	0.00613957
Ptpn13	493.438	1.71337	0.409178	4.18735	2.82235e-05	0.000829318
Hip1	755.042	1.71262	0.369131	4.6396	3.49082e-06	0.000140843
1700074P13Rik	267.937	1.7061	0.406474	4.19733	2.70082e-05	0.00080112
Fam71e1	613.5	1.70607	0.476059	3.58374	0.000338703	0.00671546
1700022A21Rik	484.523	1.70599	0.497029	3.43237	0.000598323	0.0108196
Susd1	130.785	1.70289	0.448178	3.79957	0.000144947	0.00330123
Gstt4	390.56	1.70241	0.435042	3.9132	9.10807e-05	0.00222643
Mlf1	446.515	1.70189	0.400176	4.25284	2.11072e-05	0.000651849
Prkar2a	668.584	1.701	0.370194	4.59489	4.32987e-06	0.000166633
Papd5	272.301	1.69727	0.404186	4.19922	2.67834e-05	0.000796024
Samd4	750.878	1.69552	0.40741	4.1617	3.15886e-05	0.000908264
Allc	1054.6	1.69313	0.433696	3.90397	9.46272e-05	0.00230562
BC048671	159.058	1.69265	0.480764	3.52075	0.000430326	0.00818602
Rbm28	488.463	1.68633	0.378144	4.45948	8.21578e-06	0.000286104
Ccsap	213.205	1.68413	0.415711	4.05119	5.09578e-05	0.00137168
Cd59a	170.756	1.67878	0.424088	3.95856	7.54036e-05	0.00190527
Knstrn	441.215	1.67874	0.42232	3.97504	7.03671e-05	0.00179311
Izumo2	139.988	1.67805	0.489601	3.42739	0.000609423	0.0109938
2010107G23Rik	124.904	1.67592	0.456881	3.66817	0.000244289	0.0051137
Fam131b	57.6118	1.67512	0.577829	2.899	0.0037436	0.0449142
Dcbld2	345.149	1.66837	0.463273	3.60126	0.000316676	0.00639704
Lmbrd2	58.4701	1.66759	0.544539	3.06239	0.00219576	0.0296902
Ccdc38	260.461	1.66376	0.3947	4.21527	2.49485e-05	0.000754943
1700009N14Rik	848.047	1.65834	0.442358	3.74887	0.000177636	0.00390929
Fkbp14	303.979	1.65571	0.411213	4.02642	5.66334e-05	0.00148344
Spata7	336.036	1.65495	0.38867	4.25797	2.06287e-05	0.000641028
Cabs1	879.954	1.65393	0.367484	4.5007	6.77316e-06	0.00024377
Ica1	149.722	1.65319	0.451292	3.66324	0.000249044	0.00519154
Fam129a	180.342	1.6513	0.480213	3.43867	0.000584575	0.0106093
Mllt11	438.877	1.65046	0.445053	3.70845	0.000208533	0.0045099
Iqcf4	251.794	1.64879	0.411525	4.00654	6.16149e-05	0.0015917
Pla2g5	72.5888	1.63995	0.507274	3.23287	0.00122553	0.0189629
Arhgap18	273.694	1.6366	0.533053	3.07023	0.00213894	0.0292381
1700018C11Rik	174.242	1.63404	0.499052	3.27429	0.00105928	0.0169087
C030037D09Rik	102.483	1.62929	0.511373	3.18611	0.00144199	0.0215996
Ggn	392.718	1.62274	0.511488	3.17259	0.00151085	0.0223412
Smim23	194.953	1.62259	0.530998	3.05575	0.00224502	0.0303017
Msl3	129.824	1.6223	0.465297	3.48658	0.000489232	0.00915571
Gdpd1	209.794	1.61928	0.408001	3.96882	7.22294e-05	0.00183433
Ube2d2b	206.919	1.6191	0.44779	3.61577	0.000299457	0.00609845
Yod1	96.1235	1.61875	0.499681	3.23956	0.00119715	0.0187166
Fut10	101.986	1.61758	0.475783	3.39983	0.000674282	0.0120051
Prkcd	497.214	1.61702	0.475506	3.40063	0.0006723	0.011984
Col4a4	115.498	1.61505	0.49689	3.25032	0.00115274	0.0181358
4430402I18Rik	455.134	1.61355	0.442664	3.64509	0.000267295	0.00551833
Fabp12	68.233	1.61071	0.52318	3.07868	0.00207917	0.0286296
1700019B03Rik	68.8536	1.61063	0.552719	2.91401	0.0035682	0.0433294
Mmgt2	111.094	1.60922	0.474086	3.39436	0.000687892	0.0122184
Plp1	344.504	1.60822	0.523587	3.07155	0.00212951	0.0291357
Reep6	1714.23	1.60297	0.426187	3.76119	0.000169108	0.00377217
1700015F17Rik	69.3757	1.60253	0.526998	3.04087	0.00235897	0.0314998
Tssk2	1001.62	1.59692	0.457197	3.49285	0.000477886	0.00898821
1700019B21Rik	575.694	1.59395	0.392093	4.06522	4.79863e-05	0.0013095
Oit3	216.393	1.59174	0.409361	3.88836	0.000100923	0.00243529
Ttc39d	230.147	1.59147	0.409129	3.88991	0.000100281	0.00242371
Nek6	126.546	1.59052	0.444501	3.57822	0.000345937	0.0068318
Zfp474	120.241	1.58876	0.500577	3.17386	0.00150424	0.0222654
Usp43	85.4998	1.58845	0.489945	3.2421	0.00118653	0.0186283
Mxra7	580.086	1.58364	0.377417	4.19599	2.71685e-05	0.000804285
Abhd5	524.546	1.58126	0.393539	4.01805	5.86817e-05	0.00152643
Cypt1	264.344	1.58061	0.478259	3.30492	0.000950028	0.015652
Mical3	1176.15	1.57885	0.395725	3.98978	6.61352e-05	0.00169679
Pmis2	95.2876	1.57626	0.524331	3.00623	0.00264508	0.034624
Slc22a21	207.244	1.57516	0.531068	2.96602	0.00301683	0.0381784
Gna13	443.067	1.57494	0.429808	3.66429	0.000248028	0.00517753
Nsun4	431.335	1.57095	0.437484	3.59088	0.00032957	0.00660415
Pcsk6	274.614	1.56777	0.40238	3.89624	9.76963e-05	0.00236886
Agpat5	260.292	1.5668	0.434321	3.60748	0.000309185	0.00625412
Shisa5	113.179	1.56584	0.46307	3.38143	0.00072109	0.0126583
Hook1	560.811	1.56177	0.412522	3.78592	0.00015314	0.00345636
D7Ertd443e	78.2568	1.56057	0.537718	2.90222	0.00370529	0.0445972
1700001C02Rik	99.3584	1.55194	0.487362	3.18438	0.00145067	0.0216863
Map3k9	68.4164	1.54563	0.518557	2.98063	0.00287657	0.0369013
Sept14	231.264	1.54412	0.467686	3.30161	0.000961325	0.0157889
Lin7a	121.647	1.54141	0.508699	3.03011	0.00244468	0.0324015
Pgap2	961.903	1.54132	0.355627	4.3341	1.46359e-05	0.000474449
Gm10638	244.095	1.53829	0.522137	2.94615	0.00321752	0.0399106
Grip1	495.88	1.53529	0.379198	4.04878	5.14846e-05	0.00137742
Usp44	264.408	1.5321	0.427012	3.58796	0.000333282	0.00666075
Prkcq	243.837	1.5314	0.413525	3.70328	0.00021283	0.00456991
Gm2a	6653.5	1.53021	0.349779	4.37479	1.2155e-05	0.000409966
Adcy10	352.426	1.52918	0.386831	3.95309	7.71489e-05	0.00194283
Vat1	967.572	1.52756	0.373203	4.09311	4.2562e-05	0.00118277
Slc12a7	132.589	1.52496	0.50754	3.0046	0.00265927	0.0347372
Stat4	151.882	1.52494	0.456718	3.33891	0.000841084	0.0142804
Aifm2	299.9	1.52317	0.387159	3.93422	8.34667e-05	0.00207066
Aqp11	570.223	1.52046	0.459701	3.30751	0.000941303	0.0155595
Plb1	147.491	1.51954	0.452922	3.35497	0.000793729	0.013688
Phf21b	130.529	1.51936	0.457734	3.3193	0.000902433	0.0150863
Slc25a13	265.388	1.51914	0.430934	3.52523	0.000423114	0.00806898
Rfx3	70.6805	1.51384	0.521588	2.90236	0.0037036	0.0445972
1700029H14Rik	714.765	1.51322	0.447638	3.38045	0.000723675	0.0126888
Gbas	456.322	1.51302	0.381849	3.96236	7.42125e-05	0.00187834
Pom121l2	290.191	1.50995	0.520394	2.90156	0.00371309	0.044647
Prr30	908.077	1.50978	0.457351	3.30114	0.000962926	0.0157951
Cdc34	918.872	1.50958	0.397471	3.79796	0.000145893	0.00331272
Gca	508.674	1.50446	0.49653	3.02995	0.00244593	0.0324015
1700026L06Rik	325.49	1.4994	0.451468	3.32116	0.000896437	0.0150331
Nup98	324.172	1.49644	0.389202	3.8449	0.0001206	0.00284605
Sytl4	476.639	1.48894	0.43199	3.44669	0.00056749	0.0103117
Cpeb3	229.037	1.48427	0.442892	3.35131	0.000804295	0.0137962
Jazf1	301.365	1.48055	0.389821	3.79802	0.000145856	0.00331272
Spata31d1a	193.146	1.48002	0.448562	3.29948	0.000968635	0.0158616
Fbxw10	295.073	1.47967	0.411522	3.5956	0.000323642	0.0065278
Efcab6	800.822	1.47694	0.460473	3.20744	0.00133923	0.0203722
Tsacc	115.488	1.47514	0.464685	3.17449	0.00150102	0.0222397
Spata20	2999.79	1.47458	0.485822	3.03523	0.00240353	0.0319526
8030411F24Rik	144.76	1.4739	0.457032	3.22493	0.00126002	0.0194165
Cytip	394.582	1.47231	0.40127	3.66913	0.000243376	0.00510171
Morn3	300.834	1.47224	0.461153	3.19253	0.00141034	0.0212741
Lkaaear1	157.973	1.46888	0.483103	3.0405	0.00236185	0.0315102
Rnf38	721.788	1.46851	0.397542	3.69397	0.000220781	0.00469363
Rora	204.947	1.46603	0.488794	2.99929	0.00270608	0.035165
Soga1	482.163	1.45586	0.409637	3.55404	0.000379366	0.00737553
Ica1l	101.73	1.45364	0.487139	2.98403	0.00284477	0.0365558
Tcp10b	226.419	1.45166	0.41065	3.53502	0.000407749	0.00784603
Fam46c	1327.78	1.44944	0.431855	3.35631	0.000789892	0.0136742
Gm1840	127.301	1.4463	0.491201	2.94443	0.00323555	0.0400815
Cystm1	106.445	1.44527	0.495496	2.91681	0.00353631	0.0430117
Dgkh	224.143	1.44521	0.443222	3.26069	0.00111143	0.0176336
Aldoart2	645.497	1.43992	0.434956	3.3105	0.000931296	0.0154111
Acadl	269.521	1.43702	0.412326	3.48517	0.000491829	0.00919285
Nsun7	115.747	1.4332	0.467134	3.06808	0.0021544	0.0293958
Sparc	4973.65	1.42895	0.3435	4.15997	3.18289e-05	0.000913421
9430020K01Rik	1390.37	1.42674	0.374164	3.81315	0.000137205	0.00317304
Gstcd	101.816	1.4245	0.467954	3.04411	0.0023337	0.0313016
Lrrc75a	210.893	1.42409	0.416742	3.41719	0.000632715	0.0113322
Hebp1	128.811	1.42307	0.439448	3.23832	0.00120237	0.0187456
Elovl5	294.823	1.42043	0.42551	3.33819	0.000843268	0.0143013
Avpi1	123.28	1.41892	0.443109	3.20219	0.00136387	0.0206354
D10Wsu102e	740.705	1.41754	0.387961	3.65382	0.000258369	0.00536358
Cdca2	471.927	1.41696	0.460667	3.07589	0.00209874	0.0288461
Bricd5	144.95	1.41602	0.436867	3.2413	0.00118986	0.0186416
C130074G19Rik	702.486	1.41583	0.380544	3.72054	0.000198796	0.00434313
Fam217a	221.432	1.40921	0.426354	3.30525	0.000948929	0.0156511
Myo6	339.381	1.40886	0.477223	2.95221	0.00315505	0.0394947
Fam161a	266.972	1.40885	0.449743	3.13256	0.00173287	0.0248412
Xrra1	722.206	1.40855	0.477976	2.94691	0.00320964	0.0398595
Prom1	114.348	1.4058	0.453	3.10331	0.00191371	0.0266428
Mbp	143.369	1.40437	0.429692	3.26831	0.00108191	0.0171963
Lelp1	258.963	1.40082	0.427843	3.27414	0.00105983	0.0169087
Fscb	263.027	1.39953	0.445009	3.14496	0.00166112	0.024019
Osgin1	438.412	1.39486	0.452974	3.07933	0.00207466	0.0285937
Nqo2	236.438	1.39398	0.446083	3.12492	0.00177851	0.025159
Akap1	2204.86	1.38953	0.459641	3.02307	0.00250222	0.0330306
Slain2	695.74	1.38804	0.397933	3.48813	0.000486419	0.00912583
Ccdc50	173.483	1.38792	0.449927	3.08476	0.00203719	0.0281548
Dnajb7	102.341	1.38576	0.462627	2.99542	0.00274069	0.0355532
Lrrc8b	1227.93	1.38562	0.373503	3.70979	0.000207428	0.00449897
Tmco5	328.813	1.38309	0.444693	3.11022	0.0018695	0.0261747
Ptpre	244.677	1.38286	0.436179	3.17039	0.00152235	0.0224229
Hipk1	780.859	1.37923	0.367659	3.75139	0.000175856	0.0038758
Alms1	154.111	1.37873	0.469819	2.93459	0.00333984	0.0408538
Svip	282.856	1.37777	0.419922	3.28101	0.00103436	0.0166418
Pabpc6	342.612	1.37611	0.416115	3.30703	0.000942898	0.0155687
Chst2	110.531	1.37538	0.467703	2.94071	0.00327457	0.0403974
Kif27	424.3	1.37284	0.397127	3.45694	0.000546344	0.00996732
Nbr1	1526.42	1.37253	0.373913	3.67072	0.00024187	0.00507724
Tmem135	214.88	1.36553	0.447508	3.0514	0.00227776	0.030661
Tmco2	171.34	1.36451	0.454537	3.00197	0.00268236	0.0349779
Spata24	825.935	1.35822	0.420382	3.23091	0.00123397	0.0190738
Tssk3	434.642	1.35717	0.459192	2.95555	0.00312109	0.0392004
Clic1	1452.37	1.35414	0.351956	3.84746	0.000119347	0.00282091
Leprel4	117	1.34179	0.449478	2.98521	0.00283383	0.0364464
Mex3d	1672.39	1.33955	0.417688	3.20705	0.00134104	0.0203722
Rab3il1	1161.84	1.33841	0.444834	3.00878	0.00262302	0.0343991
4922502D21Rik	665.243	1.3373	0.373427	3.58116	0.000342073	0.00676439
Ifngr1	203.539	1.33304	0.416333	3.20186	0.00136543	0.0206383
Ttc7b	487.985	1.3328	0.370948	3.59295	0.000326958	0.00656935
Hipk3	466.368	1.33079	0.408378	3.25872	0.00111915	0.0177186
Setd8	580.127	1.32745	0.379705	3.49601	0.000472273	0.00891616
Dusp6	179.574	1.32542	0.428442	3.09358	0.00197755	0.027381
Lrrc74a	261.125	1.32521	0.443567	2.98761	0.00281171	0.0361929
Mcph1	161.822	1.32086	0.447937	2.94877	0.00319043	0.0397512
Exoc6b	207.032	1.32053	0.456569	2.89229	0.00382446	0.0456653
Rap1b	565.821	1.32009	0.447729	2.94842	0.00319408	0.0397512
Gpi1	1807.45	1.31882	0.389694	3.38425	0.000713735	0.0125633
Ddit4l	144.15	1.31815	0.442417	2.97942	0.00288797	0.0370129
1700019N19Rik	594.222	1.31064	0.442642	2.96095	0.00306695	0.0386498
Sdccag3	637.93	1.3027	0.385714	3.37736	0.000731844	0.0128171
Casp6	517.731	1.30252	0.375588	3.46796	0.000524428	0.00970547
Pip5k1b	411.971	1.30228	0.396582	3.28375	0.00102436	0.0165319
Dcbld1	130.928	1.29912	0.439945	2.95292	0.00314784	0.0394373
Wdr64	160.008	1.29848	0.441674	2.9399	0.00328316	0.0403974
Sh3glb1	682.979	1.2979	0.387228	3.35178	0.000802927	0.0137962
Hsd17b10	160.167	1.29394	0.433983	2.98154	0.00286803	0.0368232
Sqrdl	548.008	1.29069	0.424726	3.03888	0.00237462	0.0316459
4930571K23Rik	1269.09	1.28703	0.368427	3.4933	0.000477093	0.00898455
Nrd1	1382.07	1.28588	0.384208	3.34684	0.000817375	0.0139726
St6galnac2	1744.04	1.28145	0.410172	3.12418	0.00178303	0.0251754
Pdzd8	418.86	1.28036	0.390843	3.2759	0.00105326	0.0168893
Prdx4	346.159	1.27275	0.381573	3.33552	0.000851394	0.0143903
Cercam	177.597	1.27187	0.43161	2.94681	0.00321075	0.0398595
Isg20l2	375.845	1.27156	0.421135	3.01936	0.00253311	0.0333796
Klhl5	1026.99	1.27015	0.366605	3.46461	0.000530997	0.00979494
Fam219b	332.647	1.26567	0.40486	3.12619	0.00177085	0.025159
Ap2b1	1278.41	1.26455	0.369317	3.42402	0.000617026	0.0111176
Ddah1	680.365	1.264	0.386008	3.27454	0.00105836	0.0169087
Tango6	364.345	1.2636	0.377266	3.34936	0.00080998	0.0138778
Hmox2	1492.94	1.2586	0.414194	3.03867	0.00237624	0.0316459
Hrasls5	1068.79	1.25479	0.427342	2.93627	0.00332189	0.0407006
Endod1	178.166	1.25046	0.423888	2.94998	0.00317798	0.0396976
Pgbd5	440.862	1.24431	0.369101	3.37118	0.000748475	0.0130778
Plekhh2	273.335	1.24309	0.394311	3.15257	0.0016184	0.0235373
Spa17	839.16	1.24142	0.381512	3.25396	0.00113809	0.0179252
Dgka	464.161	1.23182	0.394245	3.12451	0.00178102	0.0251708
A730017C20Rik	264.129	1.23028	0.410661	2.99586	0.00273673	0.0355325
Mgrn1	1187.25	1.22873	0.34959	3.51478	0.000440122	0.0083512
Mtfr1	843.282	1.22785	0.368329	3.33355	0.00085744	0.0144762
Lpp	239.644	1.22484	0.423663	2.89108	0.00383918	0.0458046
Usp12	377.199	1.21409	0.378562	3.20712	0.0013407	0.0203722
Ptgr1	1187.48	1.21352	0.376411	3.22391	0.00126454	0.0194661
Gm3880	937.47	1.20959	0.353779	3.41905	0.000628402	0.0112819
Arl2bp	1412.1	1.20513	0.36482	3.30335	0.000955357	0.0157225
Fbxl14	200.07	1.19759	0.413223	2.89818	0.00375333	0.0449591
Slco3a1	535.258	1.19511	0.364256	3.28097	0.0010345	0.0166418
Nck2	473.28	1.19318	0.389301	3.06494	0.00217716	0.0295452
Mroh2b	658.436	1.19235	0.36363	3.27902	0.00104168	0.0167394
Spata33	505.977	1.18876	0.386176	3.07828	0.00208198	0.028642
Tppp2	380.376	1.18728	0.402391	2.95057	0.0031719	0.0396725
Rnf24	171.343	1.18544	0.414553	2.85955	0.00424238	0.0496289
Lrp1	1181.43	1.18062	0.394377	2.99363	0.00275677	0.0356692
Asns	665.184	1.17502	0.371734	3.16091	0.00157275	0.0230243
Garnl3	778.429	1.16752	0.364312	3.20472	0.00135192	0.020496
Slc25a23	394.933	1.16546	0.372866	3.12567	0.00177398	0.025159
Pcmt1	474.251	1.16311	0.386993	3.0055	0.00265147	0.0346654
Folr1	379.804	1.16281	0.374042	3.10877	0.00187866	0.0262539
Pla2g7	413.028	1.16224	0.400087	2.90497	0.00367283	0.044313
Glul	1215.71	1.15709	0.378779	3.05479	0.00225221	0.0303714
Pygb	732.151	1.15474	0.36241	3.18628	0.00144116	0.0215996
Cypt12	401.962	1.15186	0.4015	2.86889	0.00411921	0.0484916
Aldh9a1	1013.53	1.1456	0.354046	3.23574	0.00121329	0.0188317
Zmym3	1343.18	1.14472	0.347991	3.2895	0.00100366	0.0162677
Bzw1	825.079	1.1433	0.398266	2.8707	0.00409568	0.0482891
Sec23a	408.325	1.14164	0.3913	2.91756	0.00352786	0.0429438
Rnf19a	681.257	1.13979	0.375519	3.03525	0.00240337	0.0319526
Lima1	535.107	1.13898	0.387384	2.94019	0.00328013	0.0403974
Cdkl3	373.843	1.13311	0.380683	2.97652	0.00291537	0.0372082
Tmem180	690.1	1.13252	0.360801	3.13892	0.00169572	0.0243784
St3gal2	437.634	1.11866	0.372968	2.99934	0.00270564	0.035165
Epas1	761.05	1.11731	0.364594	3.06454	0.00218005	0.0295576
Mast2	1346.47	1.0999	0.352531	3.12001	0.00180845	0.0254625
Sod2	400.473	1.09703	0.379236	2.89275	0.00381888	0.045635
Fhl4	2448.35	1.08548	0.344011	3.15536	0.00160302	0.0233816
Ipo5	2222.05	1.0818	0.354794	3.04909	0.00229538	0.0308645
Gatsl3	395.482	1.08155	0.372125	2.90641	0.00365597	0.0442163
Rcan1	689.222	1.07671	0.366431	2.93838	0.00329933	0.0405234
Mgat4b	1576.62	1.07509	0.355325	3.02566	0.0024809	0.0328069
Lasp1	2022.75	1.07357	0.348409	3.08134	0.00206069	0.0284273
Smarcc2	839.621	1.05643	0.363528	2.90606	0.00366015	0.0442313
Lgmn	1065.58	1.03123	0.354534	2.90868	0.00362957	0.0439779

[truncated: 1 more sheets: A>D]
